# Supplementary material
Source: Research Square preprint supplement (doi:10.21203/rs.3.rs-8374334/v1)
Supplement: Supplementary file 1 [file cdd04278bcb4bde60c4c22c1.xlsx]

## Sheet: Front page
Supplementary data for
	The Ownership Network of Global Lithium Resource Supply Chain: How Company Ownership and Capital Ownership Reshape Lithium Geopolitics in the Energy Transition
	This workbook includes the following data sheets:
	Sheets 2-6: Source data for Figures 2-6 in the manuscript.
	Sheets 2012-2023: Annual raw datasets capturing the global lithium supply chain ownership network, with records of mines, companies, controlling shareholders, and their associated countries.
	Content
	Figure 2	Changes in the number of global lithium supply chain actors in 2012-2023
	Figure 3	A comparison of global lithium production in 2012, 2016, 2020, and 2023 across the countries where lithium mines are located, where lithium mining companies are headquartered, and where the shareholders of lithium mining companies are based
	Figure 4	Evolution of the GLON community structure
	Figure 5	Comparison of core-periphery structures of GLON in 2012, 2016, 2020 and 2023
	Figure 6	Changes in trade flows and geopolitical supply risks of primary lithium products in 2012, 2016, 2020, and 2023

## Sheet: Figure 2
		Countries	Companies	Shareholders	Mines	Sum
	2012	15	14	105	15	149
	2013	15	14	83	15	127
	2014	16	12	123	13	164
	2015	15	16	116	15	162
	2016	16	20	139	17	192
	2017	18	22	196	20	256
	2018	21	30	224	24	299
	2019	21	31	232	27	311
	2020	21	24	197	23	265
	2021	24	25	224	26	299
	2022	24	29	276	30	359
	2023	26	35	301	38	400

## Sheet: Figure 3
2012						2016						2020						2023
	Mine’s country	Company’s country	Production (t,LCE)				Mine’s country	Company’s country	Production (t,LCE)				Mine’s country	Company’s country	Production (t,LCE)				Mine’s country	Company’s country	Production (t,LCE)
	Australia	Australia	56651				Australia	China	50586.6				Australia	USA	42630				Australia	USA	137668
	Chile	Chile	41000				Australia	USA	48152.3				Australia	Australia	94439				Australia	Australia	253779
	Chile	USA	29208				Chile	Chile	44000				Australia	China	75448				Australia	China	80860.2
	China	China	22636				Chile	USA	27154				Chile	Chile	72200				Australia	Ireland	27005
	Argentina	USA	14202				Argentina	USA	18197				China	China	56821				Australia	Chile	10200
	Zimbabwe	Zimbabwe	5505				China	China	25718				Chile	USA	40000				Chile	Chile	165500
	USA	USA	3961				Australia	Australia	8744.07				Argentina	Ireland	19801				Chile	USA	50000
	Portugal	Portugal	1280				Argentina	Canada	6862.5				USA	USA	10000				China	China	102513
	Brazil	Brazil	606				Argentina	Chile	6862.5				Zimbabwe	China	8309				Argentina	Ireland	27994
	Company’s country	Shareholder’s country	Production (t,LCE)				Zimbabwe	China	5193				Argentina	Australia	7492.56				Argentina	Australia	18333.9
	Australia	USA	27466.8				Argentina	Australia	4590.49				Brazil	Netherlands	6677				Argentina	Japan	5209
	Australia	Canada	12747.8				USA	USA	3849				Argentina	Japan	2816.75				Argentina	Argentina	2281.06
	Australia	China	10893.1				Argentina	Japan	1725.75				Brazil	Brazil	2210				Argentina	Canada	12690.4
	Australia	France	179.457				Portugal	Portugal	1595				Argentina	Argentina	957.695				Argentina	China	4149.6
	Australia	United Kingdom	113.271				Argentina	Argentina	1861.76				Portugal	Portugal	618				Argentina	Hong Kong, China	1150
	Australia	Other	5005.66				Brazil	Brazil	688				Company’s country	Shareholder’s country	Production (t,LCE)				Zimbabwe	China	39455
	Chile	Chile	14120				Company’s country	Shareholder’s country	Production (t,LCE)				USA	USA	51423.6				Brazil	Brazil	15952
	Chile	Canada	13117.9				USA	USA	63897.1				USA	United Kingdom	7236.9				Brazil	Netherlands	13206
	Chile	USA	4463.84				USA	United Kingdom	3328.34				USA	Canada	1258.66				Canada	Australia	9510.75
	Chile	Japan	575.346				USA	Netherlands	670.987				USA	South Korea	1375.88				Canada	USA	3170.25
	Chile	United Kingdom	354.461				USA	Norway	744.61				USA	Netherlands	1247.1				Canada	China	4045
	Chile	Other	8368.48				USA	Switzerland	374.224				USA	Switzerland	751.403				USA	USA	5000
	USA	USA	34890.5				USA	Australia	512.891				USA	Norway	723.571				Portugal	Portugal	1236
	USA	Germany	702.934				USA	Germany	495.624				USA	Sweden	674.023				Company’s country	Shareholder’s country	Production (t,LCE)
	USA	France	187.143				USA	Canada	169.199				USA	Japan	612.446				USA	USA	127482
	USA	Norway	146.051				USA	Japan	143.606				USA	Germany	479.753				USA	United Kingdom	11075
	USA	Switzerland	137.463				USA	Other	26696.1				USA	France	219.336				USA	Norway	4389.55
	USA	Canada	135.416				China	China	54024.1				USA	Australia	99.794				USA	Switzerland	3855.28
	USA	United Kingdom	427.685				China	Other	27473.5				USA	Other	26527.5				USA	France	3148.95
	USA	Other	10743.8				Chile	Canada	16276.1				China	China	93025				USA	South Korea	2920.58
	Australia	Australia	244.775				Chile	Chile	15507.2				China	USA	535.433				USA	Canada	1461.81
	China	China	20299.3				Chile	USA	7005.89				China	Other	46193.2				USA	Netherlands	1182.77
	China	Other	2336.66				Chile	Japan	628.266				Chile	Chile	19646.9				USA	Australia	1279.8
	Zimbabwe	Zimbabwe	5505				Chile	United Kingdom	359.103				Chile	China	17459.9				USA	Japan	880.166
	Brazil	Brazil	606				Chile	Other	11085.9				Chile	USA	8287.55				USA	Sweden	703.509
	Portugal	Portugal	1280				Australia	Australia	1222.56				Chile	United Kingdom	1417.47				USA	Chile	339.618
							Australia	USA	439.176				Chile	Japan	1075.65				USA	Singapore	223.783
							Australia	Other	11243.8				Chile	South Korea	466.843				USA	Germany	192.872
							USA	Luxembourg	319.642				Chile	Norway	341.116				USA	Other	36703.3
							Australia	United Kingdom	226.858				Chile	Luxembourg	181.285				Australia	USA	80479.5
							Australia	Switzerland	202.189				Chile	France	117.098				Australia	Australia	28730.8
							Japan	Japan	567.523				Chile	Switzerland	105.16				Australia	Bermuda	4630.35
							Japan	Other	1158.23				Chile	Other	23101				Australia	Norway	4738.2
							Argentina	Argentina	1861.76				China	South Korea	572.615				Australia	New Zealand	644.528
							Canada	USA	765.855				China	Norway	139.369				Australia	United Kingdom	2816.92
							Canada	Canada	233.798				China	Sweden	112.416				Australia	France	982.933
							Canada	Other	5862.85				Australia	Australia	18073.4				Australia	Switzerland	418.177
							Brazil	Brazil	688				Australia	USA	9715.51				Australia	Other	146269
							Portugal	Portugal	1595				Australia	Bermuda	2233.51				China	China	115018
													Australia	Norway	925.279				China	USA	2577.83
													Australia	United Kingdom	860.845				China	South Korea	482.921
													Australia	Other	61357.8				China	France	184.18
													Australia	China	6407.69				China	Other	111679
													Australia	South Korea	806.71				Chile	Chile	60663.1
													Ireland	USA	15917.5				Chile	China	38944.7
													Ireland	United Kingdom	842.337				Chile	USA	28707.5
													Ireland	South Korea	316.637				Chile	United Kingdom	3749.71
													Ireland	Sweden	219.644				Chile	Japan	2612.24
													Ireland	Canada	169.288				Chile	Norway	1401.07
													Ireland	Switzerland	135.285				Chile	South Korea	1166.04
													Ireland	France	111.61				Chile	Switzerland	1146.6
													Ireland	Germany	106.889				Chile	Canada	751.258
													Ireland	Other	1981.78				Chile	France	549.517
													Australia	Germany	116.055				Chile	Singapore	332.897
													Australia	Switzerland	110.979				Chile	Sweden	253.994
													Australia	Japan	856.535				Chile	Brazil	238.107
													Australia	Sweden	467.193				Chile	Spain	209.103
													Japan	Japan	1076.82				Chile	Bermuda	189.491
													Japan	Other	1739.93				Chile	Other	34784.8
													Argentina	Argentina	957.695				Australia	China	7322.26
													Netherlands	USA	519.516				Australia	South Korea	3353.02
													Netherlands	Norway	329.161				Australia	South Africa	113.955
													Netherlands	Netherlands	239.037				China	United Kingdom	361.291
													Netherlands	France	231.138				China	Singapore	302.686
													Netherlands	United Kingdom	139.23				China	Germany	135.735
													Netherlands	Other	5218.92				China	Norway	124.85
													Brazil	Brazil	2210				Ireland	USA	46187.9
													Portugal	Portugal	618				Ireland	United Kingdom	3514.28
																			Ireland	France	1706.56
																			Ireland	South Korea	1130.8
																			Ireland	Australia	775.13
																			Ireland	Norway	550.42
																			Ireland	Switzerland	515.216
																			Ireland	Canada	414.853
																			Ireland	Sweden	203.852
																			Australia	Japan	1123.87
																			Japan	Japan	2374.79
																			Japan	USA	239.533
																			Japan	Other	2594.68
																			Argentina	Argentina	2281.06
																			Brazil	Brazil	9255.59
																			Brazil	USA	1404.37
																			Brazil	Bahamas	682.04
																			Brazil	South Africa	249.716
																			Brazil	United Kingdom	186.8
																			Brazil	Other	4173.48
																			Netherlands	USA	1843.07
																			Netherlands	Netherlands	669.046
																			Netherlands	United Kingdom	509.016
																			Netherlands	Norway	473.822
																			Netherlands	Switzerland	194.536
																			Netherlands	France	173.731
																			Netherlands	Other	9342.78
																			Canada	USA	1913.74
																			Canada	United Kingdom	321.115
																			Canada	Canada	238.909
																			Canada	South Korea	150.447
																			Canada	Other	10066.2
																			Hong Kong, China	China	1306.04
																			Portugal	Portugal	1236

## Sheet: Figure 4
2012	Id	modularity_class			2016	Id	modularity_class			2020	Id	modularity_class			2023	Id	modularity_class
	Australia	0				USA	0				Portugal	0				USA	0
	Talison Lithium Ltd.	0				Albemarle Corporation	0				Grupo Mota	0				Albemarle Corp.	0
	Galaxy Resources Ltd.?	0				Salar de Atacama	0				Alvarroes	0				Salar de Atacama	0
	Greenbushes	0				Silver Peak	0				Portugal Firms	0				Silver Peak	0
	Mt Cattlin	0				Vanguard Group Inc.	0				Chile	1				Vanguard Group Inc.	0
	RCF Management LLC	0				Franklin Resources Inc.	0				Sociedad Qu锟斤拷mica y Minera de Chile S.A.	1				Capital Research and Management Co.	0
	Tianqi Lithium Corp.	0				BlackRock Inc.	0				Salar de Atacama	1				BlackRock Inc.	0
	Royal Bank of Canada	0				State Street Global Advisors Inc.	0				Inversiones SQYA S.A	1				State Street Global Advisors Inc.	0
	RBC Dominion Securities Inc.	0				Jennison Associates LLC	0				Tianqi Lithium Corp.	1				Franklin Resources Inc.	0
	Goldman Sachs Group Inc.	0				Capital Research & Mgmt Co.	0				Kowa Company Ltd.	1				PRIMECAP Management Co.	0
	CIBC Mellon Trust Co.	0				Teachers Insurance and Annuity Association-College Retirement Equities Fund	0				abrdn PLC	1				Geode Capital Management LLC	0
	Merrill Lynch Pierce Fenner & Smith Inc.	0				FMR LLC	0				Administradora de Fondos de Pensiones Cuprum SA	1				Invesco Capital Management LLC	0
	AQR Arbitrage LLC	0				Iridian Asset Management LLC	0				ClearBridge Investments LLC	1				BNY Asset Management	0
	PPM America Inc.	0				Columbia Management Investment Advisers LLC	0				Macquarie Investment Management Business Trust	1				Global X Management Co. LLC	0
	Longfellow Investment Management Co. LLC	0				Egerton Capital (UK) LLP	0				Citadel Advisors LLC	1				Dimensional Fund Advisors LP	0
	Global X Management Co. LLC	0				BNY Asset Management	0				Administradora de Fondos de Pensiones Modelo SA	1				ProShare Advisors LLC	0
	Vertex One Asset Management Inc.	0				Dimensional Fund Advisors LP	0				Marshall Wace LLP	1				Bank of America Corp.	0
	Creat Resources Holdings Ltd.	0				Janus Henderson Investors US LLC	0				RWC Partners Ltd.	1				RobecoSAM AG	0
	Water Island Capital LLC	0				Putnam LLC	0				Grantham Mayo Van Otterloo & Co LLC	1				EARNEST Partners LLC	0
	David Andrew Shaw	0				Northern Trust Global Investments	0				Candriam soci锟斤拷t锟斤拷 en commandite par actions.	1				Morgan Stanley	0
	Syquant Capital SAS	0				Geode Capital Management LLC	0				Administradora de Fondos de Pensiones PlanVital SA	1				U.S. Bancorp Asset Management Inc.	0
	PineBridge Investments LLC	0				Bank of America Corp.	0				Ita锟斤拷 Administradora General de Fondos SA	1				UBS Asset Management AG	0
	Aegon Asset Management UK Plc	0				Columbus Circle Investors	0				SEI Investments Co.	1				Charles Schwab Investment Management Inc.	0
	Chile	1				SPF Beheer BV	0				Luxembourg	1				First Trust Advisors LP	0
	Sociedad Qu锟斤拷mica y Minera de Chile S.A.	1				Norges Bank Investment Management	0				Tianqi Lithium Corp.	2				Eaton Vance Management	0
	Salar de Atacama	1				Westwood Management Corp.	0				Ganfeng Lithium Group	2				Coatue Management LLC	0
	Nutrien Ltd.	1				OppenheimerFunds Inc.	0				Australia	2				Citadel Advisors LLC	0
	Inversiones SQYA S.A	1				Adage Capital Management LP	0				Mineral Resources Ltd.	2				Allianz Global Investors U.S. LLC	0
	Nitratos de Chile SA	1				OFI Advisors LLC	0				Pilbara Minerals Ltd.	2				FMR LLC	0
	Global Mining Investments (Chile ) S.A.	1				Deutsche Asset & Wealth Management	0				Morella Corp.	2				Managed Account Advisors LLC	0
	Kowa Company Ltd.	1				First Eagle Investment Management LLC	0				Galaxy Resources Ltd.	2				Goldman Sachs Asset Management LP	0
	Baillie Gifford & Co.	1				Anchor Bolt Capital LP	0				Greenbushes	2				SEI Investments Co.	0
	Neuberger Berman BD LLC prior to change in line of business	1				Macquarie Investment Management Business Trust	0				Mount Marion	2				Voya Investment Management LLC	0
	Van Eck Associates Corp.	1				DWS Investment Management Americas Inc.	0				Pilgangoora	2				Teachers Insurance and Annuity Association-College Retirement Equities Fund	0
	Administradora de Fondos de Pensiones Cuprum SA	1				DJE Kapital AG	0				Altura	2				Empower Advisory Group LLC	0
	Scout Investments Inc.	1				Security Investors LLC	0				Mt Cattlin	2				Schweizerische Nationalbank	0
	ClariVest Asset Management LLC	1				Tide Point Capital Management LP	0				Chengdu Tianqi Industry Group Co. Ltd.	2				Deutsche Asset & Wealth Management	0
	Frank Russell Co.	1				Point7 Asset Management LP	0				Liangbin Li	2				Wells Fargo & Co.	0
	Federated Hermes, Inc.	1				Edge Asset Management Inc.	0				Christopher James Ellison	2				Susquehanna International Group LLP	0
	GE Asset Management Inc.	1				Legal & General Investment Management Ltd.	0				Allan Charles Buckler	2				ZKB Asset Management	0
	Principal Global Investors LLC	1				Charles Schwab Investment Management Inc.	0				Ningbo Shanshan Co. Ltd.	2				Invesco Ltd.	0
	Canada	1				Stelliam Investment Management LP	0				Xiaoshen Wang	2				Mitsubishi UFJ Trust and Banking Corp.	0
	Japan	1				Principal Global Investors LLC	0				Jing Zhang	2				London Co. of Virginia LLC	0
	USA	2				Royce & Associates LP	0				Fidelity International Ltd.	2				AllianceBernstein LP	0
	Rockwood Holdings Inc.	2				Allspring Global Investments LLC	0				Maxwell Terry Smith	2				Rhumbline Advisers Ltd Partnership	0
	FMC Corp.	2				Invesco Ltd.	0				Australian Super Pty Ltd	2				Luther King Capital Management Corp.	0
	Salar de Atacama	2				New York State Common Retirement Fund	0				RCF Management LLC	2				HB Wealth Management LLC	0
	Salar del Hombre Muerto	2				Baring Asset Management Ltd.	0				Contemporary Amperex Technology Co. Ltd.	2				California State Teachers' Retirement System	0
	Silver Peak	2				New Jersey Division of Investment	0				Magellan Asset Management Ltd.	2				Credit Suisse Asset Management (Switzerland) Ltd.	0
	T. Rowe Price Group Inc.	2				Legg Mason, Inc.	0				Wei Ping Jiang	2				Vest Financial LLC	0
	Morgan Stanley Investment Management Inc.	2				Goldman Sachs Group Inc.	0				Ganfeng Lithium Group Co. Ltd.	2				BMO Asset Management Corp.	0
	Atlantic Investment Management Inc.	2				Deutsche Bank AG	0				Mineral Resources Ltd.	2				Commonwealth Equity Services LLC	0
	Capital Research & Mgmt Co.	2				Hardman Johnston Global Advisors LLC	0				New York Life Investment Management LLC	2				Russell Investment Management LLC	0
	Iridian Asset Management LLC	2				Hahn Capital Management LLC	0				Shanghai Rosefinch Asset Management Co., Ltd.	2				Grandfield & Dodd LLC	0
	Vanguard Group Inc.	2				Scout Investments Inc.	0				China Securities Finance Corporation Ltd.	2				Mariner LLC	0
	Barrow Hanley Mewhinney & Strauss LLC	2				GE Asset Management Inc.	0				Posco Holdings Inc.	2				California Public Employees' Retirement System	0
	BlackRock Inc.	2				California Public Employees' Retirement System	0				Samsung Asset Management Co. Ltd.	2				Envestnet Asset Management Inc.	0
	Jana Partners Management LP	2				Davenport & Co. LLC	0				Farjoy Pty Ltd.	2				Davenport & Co. LLC	0
	Cadian Capital Management LP	2				California State Teachers' Retirement System	0				China Universal Asset Management Co. Ltd.	2				Twin Tree Management LP	0
	FMR LLC	2				Lord Abbett & Co. LLC	0				HSBC Jintrust Fund Management Co. Ltd.	2				New York State Teachers' Retirement System	0
	Axon Capital LP	2				Morgan Stanley	0				Harvest Fund Management Co. Ltd.	2				New York State Common Retirement Fund	0
	Allianz Asset Management GmbH	2				Lincoln Financial Investments Corp.	0				Paradice Investment Management Pty Ltd.	2				Walleye Capital LLC	0
	Fred Alger Management LLC	2				United Kingdom	0				Pacific Asset Management Co. Ltd.	2				Hardman Johnston Global Advisors LLC	0
	First Eagle Investment Management LLC	2				Norway	0				Goldman Sachs Asset Management LP	2				State Board of Administration of Florida	0
	State Street Global Advisors Inc.	2				Netherlands	0				GO ETF Solutions LLP	2				INTECH Investment Management LLC	0
	JP Morgan Asset Management	2				Germany	0				E Fund Management Co. Ltd.	2				D.E. Shaw & Co. LP	0
	Sculptor Capital Management Inc.	2				Chile	1				Zhong Ou Fund Management Co., Ltd	2				Samlyn Capital LLC	0
	Gates Capital Management Inc.	2				Sociedad Qu锟斤拷mica y Minera de Chile S.A.	1				Van Eck Associates Corp.	2				Group One Trading L.P.	0
	D.E. Shaw & Co. LP	2				Canada	1				GF Fund Management Co. Ltd.	2				ALPS Advisors Inc.	0
	Southpoint Capital Advisors LP	2				Salar de Atacama	1				ABC-CA Fund Management Co. Ltd.	2				Adage Capital Management LP	0
	Cramer Rosenthal McGlynn LLC	2				Nutrien Ltd.	1				Haibo Shen	2				AQR Capital Management LLC	0
	ClearBridge Investments LLC	2				Inversiones SQYA S.A	1				Paul Kevin Mantell	2				Bridgewater Associates LP	0
	RS Investment Management Co. LLC	2				SailingStone Capital Partners LLC	1				Guotai Asset Mgmt Co. Ltd.	2				Switzerland	0
	Invesco Ltd.	2				Kowa Company Ltd.	1				Shenzhen Gemboom Investment Management Co., Ltd.	2				Chile	1
	Allianz Global Investors U.S. LLC	2				Abrdn Holdings Limited	1				Yinhua Fund Management Co. Ltd.	2				Sociedad Qu锟斤拷mica y Minera de Chile S.A.??	1
	Janus Henderson Investors US LLC	2				Administradora de Fondos de Pensiones Cuprum SA	1				D&C Geraghty Pty. Ltd.	2				Salar de Atacama	1
	American Century Investment Management Inc	2				Axiom Investors LLC	1				Nero Resource Fund Pty Ltd	2				Inversiones SQYA S.A	1
	LSV Asset Management	2				Eaton Vance Management	1				China Merchants Fund Management Co. Ltd.	2				Tianqi Lithium Corp.	1
	Adage Capital Management LP	2				Global X Management Co. LLC	1				National Council for Social Security Fund	2				Administradora de Fondos de Pensiones Habitat SA	1
	William Blair Investment Management LLC	2				Baron Capital Group Inc.	1				James Stuart Brown	2				Administradora de Fondos de Pensiones Cuprum SA	1
	Seifollah Ghasemi	2				RBC Global Asset Management Inc.	1				Anthony Peter Tse	2				Administradora de Fondos de Pensiones Capital SA	1
	Massachusetts Financial Services Company	2				Renaissance Technologies LLC	1				Shenzhen Qianyuan Investment Co., Ltd.	2				AFP Provida SA	1
	Luther King Capital Management Corp.	2				STRS Ohio	1				Creat Resources Holdings Ltd.	2				Kowa Company Ltd.	1
	Sasco Capital Inc.	2				Portugal	2				Xue Investments Pty Ltd.	2				abrdn PLC	1
	Corvex Management LP	2				Grupo Mota	2				China Asset Management Co. Ltd.	2				Lazard Asset Management LLC	1
	Jennison Associates LLC	2				Alvarroes	2				Beng Teik Kuan	2				Mondrian Investment Partners Ltd.	1
	Standard Investments LLC	2				Portugal Firms	2				ICBC Credit Suisse Asset Management Co. Ltd.	2				Macquarie Investment Management Business Trust	1
	Frontier Capital Management Co LLC	2				China	3				Rosefinch Fund Management Co. Ltd.	2				Allspring Global Investments LLC	1
	Amundi Asset Management SAS	2				Tianqi Lithium Corporation	3				AEGON-Industrial Fund Mgmt Co.	2				Itau USA Asset Management Inc.	1
	Northern Trust Global Investments	2				Yichun Tantalum Co Ltd	3				Martin Ronald Rowley	2				LarrainVial Asset Management Administradora General de Fondos SA	1
	Wellington Management Group LLP	2				Australia	3				HuaAn Fund Management Company Ltd.	2				Eastspring Investments (Singapore) Ltd.	1
	SailingStone Capital Partners LLC	2				Galaxy Resources Ltd.	3				Thornburg Investment Management Inc.	2				Banchile Administradora General de Fondos SA	1
	Teachers Insurance and Annuity Association-College Retirement Equities Fund	2				Qinghai Salt Lake Industry Co.,Ltd	3				China Southern Asset Management Co. Ltd.	2				Zurich Asset Management Administradora General De Fondos SA	1
	Brown Advisory Inc.	2				Qinghai Zhongxin Guoan Technology development Co., LTD	3				Fullgoal Fund Management Co. Ltd.	2				BCI Administradora de Fondos Mutuos SA	1
	Columbia Wanger Asset Management LLC	2				Tibet Mineral Development Co., LTD	3				Wanjia Asset Management Co. Ltd.	2				Ita锟斤拷 Unibanco Holding SA	1
	Norges Bank Investment Management	2				Ganfeng Lithium Group Co., Ltd.	3				Endeavor Asset Management Pty. Ltd.	2				Empowered Funds LLC	1
	Two Sigma Investments LP	2				Mineral Resources Limited	3				Huatai-PineBridge Fund Management Co. Ltd.	2				Santander Asset Management SA SGIIC	1
	Serengeti Asset Management LP	2				Neometals Ltd	3				Wilson Asset Management (International) Pty Ltd.?	2				Todd Asset Management LLC	1
	Denver Investment Advisors LLC	2				Greenbushes	3				Huicen Capital Pty Ltd.	2				BTG Pactual Global Asset Management Ltd.	1
	UBS Asset Management AG	2				Yichun	3				Everbright Pramerica Fund Management Co.	2				Compass Group LLC	1
	BNY Asset Management	2				Mt Cattlin	3				Commodity Capital AG	2				Ita锟斤拷 Administradora General de Fondos SA	1
	Mackenzie Financial Corp.	2				Chaerhan Lake	3				Jianlang Xiong	2				Larrainvial Administradora De Fondos S.A.	1
	NLG Capital Inc.	2				West Taijinair	3				Orient Fund Management Co. Ltd.	2				Driehaus Capital Management LLC	1
	Riverbridge Partners LLC	2				Zhabuye	3				AGF Management Ltd.	2				Moneda Administradora de Fondos de Invers	1
	Findlay Park Partners LLP	2				Mount Marion	3				Bermuda	2				Capital Advisors Inc.	1
	STRS Ohio	2				Chengdu Tianqi Industry Group Co. Ltd.	3				Ireland	3				Administradora General de Fondos Security SA	1
	Brighthouse Investment Advisers LLC	2				Jiangxi Tungsten Holding Group Co., LTD	3				Arcadium Lithium plc	3				Liontrust Asset Management PLC	1
	Westfield Capital Management Co. L.P.	2				Wei Ping Jiang	3				Allkem Ltd.	3				Royal London Asset Management Ltd.	1
	GAMCO Investors Inc.	2				China Universal Asset Management Co. Ltd.	3				Japan	3				BICE Inversiones Administradora General de Fondos SA	1
	Renaissance Technologies LLC	2				Zhongxin Guoan	3				Toyota Tsusho Corp.	3				Boston Common Asset Management LLC	1
	Fairpointe Capital LLC	2				Central Huijin Asset Management Ltd.	3				Argentina	3				Border To Coast Pensions Partnership Ltd.	1
	ClearArc Capital Inc.	2				Qinghai State-owned Assets Investment and Management Co. Ltd.	3				Jujuy Energia y Mineria	3				Teachers' Retirement System of the State of Kentucky	1
	Argentina	2				Sinochem Holdings Corporation Ltd.	3				Salar del Hombre Muerto	3				NS Partners Ltd	1
	Germany	2				New China Life Insurance Co. Ltd.	3				Salar de Olaroz	3				RBC Global Asset Management Inc.	1
	United Kingdom	2				AGF Management Ltd.	3				Argentina Firms	3				STRS Ohio	1
	France	2				Bihua Zhang	3				Toyota Tsusho Corp.	3				Spain	1
	Norway	2				Yinhua Fund Management Co. Ltd.	3				Wellington Management Group LLP	3				Australia	2
	Switzerland	2				Shenzhen Qianyuan Investment Co., Ltd.	3				Columbia Management Investment Advisers LLC	3				Pilbara Minerals Ltd.	2
	China	3				Paradice Investment Management Pty Ltd.	3				Handelsbanken Asset Management	3				Mineral Resources Ltd.	2
	Yichun Tantalum Co Ltd	3				China Asset Management Co. Ltd.	3				Toyota Motor Corp.	3				IGO Ltd	2
	Sichuan Mineral Industry Co., Ltd.	3				Lichun Chen	3				Joho Capital L.L.C.	3				Wesfarmers Ltd.	2
	Western Mining Group Co. Ltd.	3				Tibet Mining Asset Operation Co. Ltd.	3				L Capital Pty. Ltd.	3				Core Lithium Ltd	2
	Tibet Mineral Dev. Co. LTD	3				Invesco Great Wall Fund Management Co. Ltd	3				Toyota Industries Corp.	3				Greenbushes	2
	Qinghai Zhongxin Guoan Technology development Co., LTD	3				China Cinda Asset Management Co. Ltd.	3				Millennium Management LLC	3				Pilgangoora	2
	Qinghai Salt Lake Industry Co.	3				Zhongrong International Trust Co. Ltd.	3				CIBC Pvt. Wealth Advisors Inc.	3				Wodgina	2
	Yichun	3				Fullgoal Fund Management Co. Ltd.	3				LMCG Investments LLC	3				Altura	2
	Jiajika	3				National Council for Social Security Fund	3				Ruffer LLP	3				Mount Marion	2
	East Taijinair	3				Creat Resources Holdings Ltd.	3				Granite Investment Partners LLC	3				Mt Holland - Lithium	2
	Zhabuye	3				Abu Dhabi Investment Authority	3				Axel Capital Management LLC	3				Finniss	2
	West Taijinair	3				Australia Firms	3				Victory Capital Management Inc.	3				Ganfeng Lithium Group Co. Ltd.	2
	Chaerhan Lake	3				Liangbin Li	3				Morgan Stanley	3				JPMorgan Chase & Co.	2
	Jiangxi Tungsten Holding Group Co., LTD	3				Changsheng Fund Management Co. Ltd.	3				Frontier Capital Management Co LLC	3				Christopher James Ellison	2
	China Firms	3				China Great Wall Asset Management Co. Ltd.	3				Foord Asset Management Guernsey Ltd	3				Australian Super Pty Ltd	2
	Zhongxin Guoan	3				Anthony Peter Tse	3				National Bank Trust Inc.	3				Citigroup Inc.	2
	Tibet Mining Asset Operation Co. Ltd.	3				China Southern Asset Management Co. Ltd.	3				Royce & Associates LP	3				Yandal Investments Pty. Ltd..	2
	Qinghai State-owned Assets Investment and Management Co. Ltd.	3				Charles Bernard Francis Whitfield	3				Nomura Asset Management Co. Ltd.	3				Fidelity International Ltd.	2
	Sinochem Holdings Corporation Ltd.	3				USA Firms	3				Principal Global Investors LLC	3				Norges Bank Investment Management	2
	Zimbabwe	4				FMC Corp.	4				RobecoSAM AG	3				Posco Holdings Inc.	2
	Bikita Minerals (PTY) Ltd	4				Lithium Americas (Argentina) Corp.	4				Peregrine Capital Management LLC	3				Mirae Asset Global Investments Co. Ltd.	2
	Bikita	4				Allkem Limited	4				Citigroup Inc.	3				T. Rowe Price Group Inc.	2
	Zimbabwe Firms	4				Argentina	4				Richard Phillip Seville	3				First Sentier Investors (Australia) IM Ltd	2
	Brazil	5				Jujuy Energia y Mineria Sociedad del Estado	4				American Beacon Advisors Inc.	3				Perpetual Ltd.	2
	Companhia Brasileira de L锟斤拷tio	5				Japan	4				Renaissance Technologies LLC	3				BNP Paribas Securities Corp.	2
	Cachoeira	5				Toyota Tsusho Corporation	4				Sweden	3				Fraserx PTY Ltd.	2
	Brazil Firms	5				Salar del Hombre Muerto	4				Netherlands	4				BetaShares Capital Ltd.	2
	Portugal	6				Cauchari-Olaroz	4				AMG Critical Materials N.V.	4				JP Morgan Asset Management	2
	Grupo Mota	6				Salar de Olaroz	4				Brazil	4				Milford Asset Management LTD	2
	Alvarroes	6				Argentina Firms	4				Companhia Brasileira de L锟斤拷tio	4				Colonial First State Investments Ltd.	2
	Portugal Firms	6				Glenview Capital Management LLC	4				Mibra	4				LG Chem Ltd.	2
						Barrow Hanley Mewhinney & Strauss LLC	4				Cachoeira	4				Jove Pty Ltd	2
						George Ring Ireland	4				Brazil Firms	4				Mccusker Holdings Pty. Ltd.	2
						Luther King Capital Management Corp.	4				Norges Bank Investment Management	4				D&C Geraghty Pty. Ltd.	2
						Pzena Investment Management Inc.	4				Heinz C. Schimmelbusch	4				Nt-Comnwlth Super Corp	2
						Toyota Motor Corp.	4				BNPP Asset Management Holding	4				CPU Share Plans Pty Ltd.	2
						LSV Asset Management	4				Amundi Asset Management SAS	4				Netwealth Investments Ltd.	2
						Fairpointe Capital LLC	4				Invesco Ltd.	4				McCusker Charitable Foundation	2
						Foord Asset Management Guernsey Ltd	4				DNB Asset Management AS	4				Perth Select Seafoods Pty Ltd	2
						MultiConcept Fund Management S.A.	4				Norway	4				Argo Investments Ltd.	2
						T. Rowe Price Group Inc.	4				France	4				Sichuan Yahua Industrial Group Co. Ltd.	2
						Sculptor Capital Management Inc.	4				China	5				Jupiter Fund Management PLC	2
						River Road Asset Management LLC	4				Qinghai Salt Lake Industry Co.,Ltd	5				Leendert Hoeksema	2
						Thunderbird Partners LLP	4				Yichun Tantalum Co Ltd	5				Allianz Asset Management GmbH	2
						Sasco Capital Inc.	4				Western Mining Group Co. Ltd.	5				Peter Barrett Capp	2
						American Century Investment Management Inc	4				Youngy Invt Hldg Grp Co.Ltd.	5				Kenneth Edward Brinsden	2
						Janus Henderson Group PLC	4				Sinomine Resource Grp Co Ltd	5				Hermes Investment Management Ltd.	2
						Russell Investment Management LLC	4				Qinghai Hengxin Rongliye Technology Co.Ltd.	5				National Pension Service	2
						UBS Asset Management AG	4				Zangge Mining Company Limited?	5				Australian Foundation Investment Co. Ltd.	2
						Toyota Industries Corp.	4				Qinghai Technology development Co., LTD	5				Gold Fields Ltd.	2
						James Derrick Calaway	4				Tibet Mineral Dev. Co. LTD	5				Korea Investment Corp.	2
						Frontier Capital Management Co LLC	4				Chaerhan Lake	5				Danielle Sharon Tudehope	2
						Goldman Sachs Asset Management LP	4				Yichun	5				Norway	2
						Nikko Asset Management Co. Ltd.	4				East Taijinair	5				South Korea	2
						Schweizerische Nationalbank	4				Jiajika	5				Bermuda	2
						Franco Mignacco	4				Bikita	5				New Zealand	2
						Massachusetts Financial Services Company	4				West Taijinai Lake	5				Germany	2
						Richard Phillip Seville	4				Qarhan Lake	5				China	3
						DWS Investment GmbH	4				West Taijinair	5				Tianqi Lithium Corp.	3
						John Anthony Kanellitsas	4				Zhabuye	5				Ganfeng Lithium Group	3
						ZKB Asset Management	4				Jintaier Lake	5				Qinghai Salt Lake Industry Co.	3
						Cove Street Capital LLC	4				Jiangxi Tungsten Holding Group Co., LTD	5				Sinomine Resource Grp Co Ltd	3
						Switzerland	4				China Firms	5				Yichun Tantalum Co Ltd	3
						Luxembourg	4				Zhongxin Guoan	5				Zangge Mining Co.	3
						Brazil	5				Tibet Zangge Venture Capital Group Co. Ltd.	5				Western Mining Group Co. Ltd.	3
						Companhia Brasileira de L锟斤拷tio	5				Qinghai State-owned Assets Investment and Management Co. Ltd.	5				Youngy Invt Hldg Grp Co.Ltd.	3
						Cachoeira	5				Sinochem Holdings Corporation Ltd.	5				Zhejiang Huayou Cobalt Co. Ltd	3
						Brazil Firms	5				China Nonferrous Metal Mining (Group) Co. Ltd.	5				Qinghai Hengxin Rongliye Technology Co., Ltd.	3
						Western Mining Group Co., Ltd.	6				ICBC Financial Asset Investment Co. Ltd.	5				Qinghai Zhongxin Guoan Technology development Co., LTD	3
						Sinomine International Exploration (Hong Kong) Co. Ltd.	6				China Development Bank	5				China Minmetals Corp.	3
						East Taijinair	6				Sichuan Yonghong Industrial Co., Ltd.	5				Tibet Mineral Dev. Co. LTD	3
						Bikita	6				Postal Savings Bank Of China Co. Ltd. Qinghai Branch	5				Zijin Mining Group Co. Ltd.	3
						China Firms	6				China Construction Bank Corp.	5				Chengxin Lithium Group	3
						Zimbabwe	6				Bank of China Co. Ltd. Qinghai Branch	5				Tibet Summit Resources Co	3
											Meichun Sun	5				Chaerhan Lake	3
											Agricultural Bank of China Ltd.	5				Bikita	3
											Yong Ming Xiao	5				Yichun	3
											China Cinda Asset Management Co. Ltd.	5				Qarhan Lake	3
											Tibet Mining Asset Operation Co. Ltd.	5				East Taijinair	3
											Haihua Zhong	5				Jiajika	3
											Shenzhen Oriental Fortune Venture Capital Management Co. Ltd.	5				Arcadia	3
											Beijing Lianzhong Peer Biotechnology Co. Ltd.	5				West Taijinai Lake	3
											Pingwei Wang	5				West Taijinair	3
											Haitong M&A (Shanghai) Private Fund Management Co. Ltd.	5				Qinghai Yiliping	3
											Ningbo Meishan Bondedn Port Area Xinsha Hongyun Investment Management Co. Ltd.	5				Zhabuye	3
											Zimbabwe	5				Tanco	3
											USA	6				Sabi Star	3
											Albemarle Corp.	6				Xiangyuan	3
											Salar de Atacama	6				Jintaier Lake	3
											Silver Peak	6				Lakkor Tso Salt Lake	3
											Vanguard Group Inc.	6				Chengdu Tianqi Industry Group Co. Ltd.	3
											BlackRock Inc.	6				Jiangxi Tungsten Holding Group Co., LTD	3
											Franklin Resources Inc.	6				China Firms	3
											State Street Global Advisors Inc.	6				Liangbin Li	3
											PRIMECAP Management Co.	6				Zhongxin Guoan	3
											Baillie Gifford & Co.	6				Qinghai State-owned Assets Investment and Management Co. Ltd.	3
											FMR LLC	6				China Nonferrous Metal Mining (Group) Co. Ltd.	3
											BNY Asset Management	6				Tibet Zangge Venture Capital Group Co. Ltd.	3
											Putnam LLC	6				Xiaoshen Wang	3
											Geode Capital Management LLC	6				ICBC Financial Asset Investment Co. Ltd.	3
											Dimensional Fund Advisors LP	6				Weiping Jiang	3
											Global X Management Co. LLC	6				Ningbo Meishan Bondedn Port Area Xinsha Hongyun Investment Management Co. Ltd.	3
											Mirae Asset Global Investments Co. Ltd.	6				China Development Bank	3
											Northern Trust Global Investments	6				Sinochem Holdings Corporation Ltd.	3
											SPF Beheer BV	6				Shaanxi Coal and Chemical Industry Group Co.Ltd.	3
											Aegon Asset Management UK Plc	6				Bank of China Co. Ltd. Qinghai Branch	3
											ProShare Advisors LLC	6				Yong Ming Xiao	3
											Invesco Capital Management LLC	6				Postal Savings Bank Of China Co. Ltd. Qinghai Branch	3
											Shapiro Capital Management LLC	6				Zhejiang Huayou Holding Group Co., Ltd.	3
											Bank of America Corp.	6				Tibet Mining Asset Operation Co. Ltd.	3
											First Trust Advisors LP	6				China Securities Finance Corporation Ltd.	3
											Ensign Peak Advisors Inc.	6				China Construction Bank Corp.	3
											Pictet Asset Management Ltd.	6				Meichun Sun	3
											U.S. Bancorp Asset Management Inc.	6				Agricultural Bank of China Ltd.	3
											Canada Pension Plan Investment Board	6				Minxi Xinghang State-owned Assets Investment Operation Co.Ltd.	3
											Charles Schwab Investment Management Inc.	6				Sichuan Yonghong Industrial Co., Ltd.	3
											Legal & General Investment Management Ltd.	6				GF Securities Asset Management Co.Ltd.	3
											Teachers Insurance and Annuity Association-College Retirement Equities Fund	6				Pacific Asset Management Co. Ltd.	3
											Scotia Asset Management LP	6				HSBC Jintrust Fund Management Co. Ltd.	3
											Eagle Asset Management Inc.	6				Xue Hua Chen	3
											UBS Asset Management AG	6				China Cinda Asset Management Co. Ltd.	3
											EARNEST Partners LLC	6				E Fund Management Co. Ltd.	3
											Personal Capital Advisors Corp.	6				Shenzhen Chengtun Industrial Development Co. Ltd.	3
											Managed Account Advisors LLC	6				Zuoping Zheng	3
											Mitsubishi UFJ Trust & Banking Corp.	6				Orient Fund Management Co. Ltd.	3
											Eaton Vance Management	6				China Southern Asset Management Co. Ltd.	3
											Schweizerische Nationalbank	6				Hangzhou Youyou Business Management Partnership Enterprise (L.P.)	3
											Nikko Asset Management Co. Ltd.	6				Zijin Mining Group Co. Ltd.	3
											Wells Fargo & Co.	6				Shanghai Guotai Junan Securities Asset Management Co. Ltd.	3
											T. Rowe Price Group Inc.	6				GIC Pte. Ltd.	3
											New York State Common Retirement Fund	6				UBS SDIC Fund Management Co. Ltd.	3
											Mariner LLC	6				Wuhu Xinzeqing Investment Management Partnership (Limited Partnership)	3
											Stichting Pensioenfonds ABP	6				Pingwei Wang	3
											Avalon Advisors LLC	6				Huatai-PineBridge Fund Management Co. Ltd.	3
											American Century Investment Management Inc	6				Fullgoal Fund Management Co. Ltd.	3
											Allianz Asset Management GmbH	6				China Merchants Securities Asset Management Co. Ltd.	3
											DJE Kapital AG	6				China Universal Asset Management Co. Ltd.	3
											Royal Bank of Canada	6				China Asset Management Co. Ltd.	3
											Barclays PLC	6				Haihua Zhong	3
											Marathon Asset Management Ltd.	6				First State Cinda Fund Management Co. Ltd.	3
											Payden & Rygel	6				Beijing Lianzhong Peer Biotechnology Co. Ltd.	3
											GE Asset Management Inc.	6				Shenzhen Jinhui Rongsheng Wealth Management Co. Ltd.	3
											United Kingdom	6				Haibo Shen	3
											South Korea	6				Greenwoods Asset Management Ltd.	3
											Canada	6				ABC-CA Fund Management Co. Ltd.	3
											Germany	6				Truvalue Asset Management Co.,Ltd.	3
											Switzerland	6				Wanjia Asset Management Co. Ltd.	3
																Harvest Fund Management Co. Ltd.	3
																Bosera Asset Management Co. Ltd.	3
																Zangge Mining Company Limited ESOP	3
																Rosefinch Fund Management Co. Ltd.	3
																ICBC Credit Suisse Asset Management Co. Ltd.	3
																Xinjiang Tacheng International Resources Ltd.	3
																Ping An UOB Fund Management Co. Ltd.	3
																Citic Securities Co. Ltd.	3
																Guotai Asset Mgmt Co. Ltd.	3
																Zhejiang Hongyue Private Fund Management Co. Ltd.	3
																Huashang Fund Management Co. Ltd.	3
																Franklin Templeton Sealand Fund Management Co. Ltd.	3
																Jinzhi Jiang	3
																BYD Company Ltd.	3
																Zimbabwe	3
																Singapore	3
																Brazil	4
																Sigma Lithium Corp.	4
																Netherlands	4
																AMG Critical Materials N.V.	4
																Companhia Brasileira de L锟斤拷tio	4
																Grota do Cirilo	4
																Mibra	4
																Cachoeira	4
																A0 Investimentos Ltda.	4
																Brazil Firms	4
																Stichting Pensioenfonds ABP	4
																Fitpart Fund Administration Services Ltd.	4
																Heinz C. Schimmelbusch	4
																Nucleo Capital Ltda.	4
																SPF Beheer BV	4
																Rosewill Bay Ltd.	4
																Frontier Capital Management Co LLC	4
																Electron Capital Partners LLC	4
																Calvyn Gardner	4
																Goldman Sachs Group Inc.	4
																Maven Securities Ltd.	4
																Appian Way Asset Management LP	4
																Soci锟斤拷t锟斤拷 G锟斤拷n锟斤拷rale SA	4
																Eric E. Jackson	4
																Damask Inc.	4
																Baker Steel Capital Managers LLP	4
																Cesar Chicayban	4
																BTG Pactual Servi?os Financeiros S.A. Distribuidora de T锟斤拷tulos e Valores Mobili锟斤拷	4
																PGGM	4
																Bahamas	4
																South Africa	4
																Ireland	5
																Arcadium Lithium plc	5
																Allkem Ltd	5
																Canada	5
																Lithium Americas (Argentina) C	5
																Sayona Mining Ltd.	5
																Japan	5
																Toyota Tsusho Corp	5
																Piedmont Lithium Inc	5
																Argentina	5
																Jujuy Energia y Mineria	5
																Hong Kong, China	5
																Revotech Asia Ltd	5
																Salar del Hombre Muerto	5
																Mt Cattlin	5
																Salar de Olaroz	5
																Pastos Grandes	5
																North American Lithium	5
																Sal de Vida	5
																Cauchari-Olaroz	5
																Sal de los Angeles	5
																Wellington Management Group LLP	5
																Baillie Gifford & Co.	5
																Millennium Management LLC	5
																Argentina Firms	5
																Van Eck Associates Corp.	5
																Grantham Mayo Van Otterloo & Co. LLC	5
																Columbia Management Investment Advisers LLC	5
																Northern Trust Global Investments	5
																Amundi Asset Management SAS	5
																Pictet Asset Management Ltd.	5
																Jane Street Group LLC	5
																Legal & General Investment Management Ltd.	5
																Shapiro Capital Management LLC	5
																General Motors Co.	5
																Toyota Motor Corp.	5
																Piedmont Lithium Inc.	5
																Toyota Tsusho Corp.	5
																BNPP Asset Management Holding	5
																Principal Global Investors LLC	5
																Canada Pension Plan Investment Board	5
																American Century Investment Management Inc	5
																Barclays Bank PLC	5
																Polygon Global Partners LLP	5
																CI Global Asset Management	5
																Hudson River Trading LLC	5
																Toyota Industries Corp.	5
																Handelsbanken Asset Management	5
																DNB Asset Management AS	5
																ETFS Management (AUS) Ltd.	5
																Barclays PLC	5
																Janus Henderson Group PLC	5
																Royal Bank of Canada	5
																Nikko Asset Management Co. Ltd.	5
																Leeward Investments LLC	5
																Merrill Lynch Pierce Fenner & Smith Inc.	5
																Polar Capital Holdings PLC	5
																Schroder Investment Management Ltd.	5
																CIBC Pvt. Wealth Advisors Inc.	5
																Foord Asset Management Guernsey Ltd	5
																ClearBridge Investments LLC	5
																Fifthdelta Ltd.	5
																Nomura Asset Management Co. Ltd.	5
																Nordea Investment Management AB	5
																Acuity Capital Investment Management Pty Ltd	5
																George Ring Ireland	5
																BNP Paribas Financial Markets SNC	5
																Brett Laurence Lynch	5
																Paul Anthony Crawford	5
																Caisse de d锟斤拷p?t et placement du Qu锟斤拷bec	5
																AXA Investment Managers SA	5
																HSBC Global Asset Management (UK) Ltd.	5
																Mitsubishi UFJ Asset Management Co. Ltd.	5
																Tredje AP-fonden	5
																John Anthony Kanellitsas	5
																MUFG Bank Ltd.	5
																GWL Investment Management Ltd.	5
																Franco Mignacco	5
																Daiwa Asset Management Co. Ltd.	5
																Allan Charles Buckler	5
																Ossiam	5
																United Kingdom	5
																France	5
																Sweden	5
																Portugal	6
																Grupo Mota	6
																Alvarroes	6
																Portugal Firms	6

## Sheet: Figure 5
2012	node1	node2	weight			2016	node1	node2	weight			2020	node1	node2	weight			2023	node1	node2	weight
	Australia	Talison Lithium Ltd.	53000				USA	Albemarle Corporation	79155.3				China	Zhongxin Guoan	92630				USA	Albemarle Corp.	192668
	Chile	SQM	41000				Chile	SQM	50862.5				West Taijinair	Zhongxin Guoan	72200				Chile	SQM	175700
	USA	Rockwood Holdings Inc.	33169				China	Tianqi Lithium Corporation	50478.3				China	Zhong Ou Fund Management Co., Ltd	44892.6				Australia	Pilbara Minerals Ltd.	122932
	USA	FMC Corp.	14202				USA	FMC Corp.	18197				Mount Marion	Zhong Ou Fund Management Co., Ltd	31078				Australia	Mineral Resources Ltd.	59507.5
	China	Yichun Tantalum Co Ltd	9787				China	Yichun Tantalum Co Ltd	9787				China	Yong Ming Xiao	31078				China	Tianqi Lithium Corp.	56341.2
	Zimbabwe	Bikita Minerals (PTY) Ltd	5505				China	Western Mining Group Co., Ltd.	8421				Qarhan Lake	Yong Ming Xiao	26834				Ireland	Arcadium Lithium plc	54999
	China	Sichuan Mineral Industry Co., Ltd.	4856				Australia	Galaxy Resources Ltd.	8125				China	Yinhua Fund Management Co. Ltd.	20539				Australia	IGO Ltd	52978.8
	Australia	Galaxy Resources Ltd.	3651				Canada	Lithium Americas (Argentina) Corp.	6862.5				Greenbushes	Yinhua Fund Management Co. Ltd.	19801				China	Ganfeng Lithium Group	33151.1
	China	Western Mining Group Co. Ltd.	2970				Australia	Allkem Limited	4590.49				Mount Marion	Yinhua Fund Management Co. Ltd.	15988				China	Qinghai Salt Lake Industry Co.	30831
	China	Tibet Mineral Dev. Co. LTD	2592				China	Sinomine International Exploration (Hong Kong) Co. Ltd.	3842.82				Australia	Xue Investments Pty Ltd.	13502				China	Sinomine Resource Grp Co Ltd	25551.6
	China	Qinghai Zhongxin Guoan Technology development Co., LTD	1980				China	Qinghai Salt Lake Industry Co.,Ltd	3727				Pilgangoora	Xue Investments Pty Ltd.	9787				Australia	Allkem Ltd	18333.9
	Portugal	Grupo Mota	1280				China	Qinghai Zhongxin Guoan Technology development Co., LTD	1980				China	Xiaoshen Wang	9454				China	Yichun Tantalum Co Ltd	13975
	Brazil	Companhia Brasileira de Lítio	606				Argentina	Jujuy Energia y Mineria Sociedad del Estado	1861.76				Mount Marion	Xiaoshen Wang	8059				Brazil	Sigma Lithium Corp.	13742
	China	Qinghai Salt Lake Industry Co.	451				Japan	Toyota Tsusho Corporation	1725.75				Australia	Wilson Asset Management (International) Pty Ltd.	7492.56				Netherlands	AMG Critical Materials N.V.	13206
	Talison Lithium Ltd.	Greenbushes	53000				Portugal	Grupo Mota	1595				Mount Marion	Wilson Asset Management (International) Pty Ltd.	6677				Canada	Lithium Americas (Argentina) C	12690.4
	SQM	Atacama(SQM)	41000				China	Tibet Mineral Development Co., LTD	1442.4				USA	Wells Fargo & Co.	6148.66				China	Zangge Mining Co.	12000
	Rockwood Holdings Inc.	Atacama(Rockwood)	29208				Brazil	Companhia Brasileira de Lítio	688				Greenbushes	Wells Fargo & Co.	6000				China	Western Mining Group Co. Ltd.	11942
	FMC Corp.	Salar del Hombre Muerto	14202				China	Ganfeng Lithium Group Co., Ltd.	468.928				Atacama(Albemarle)	Wells Fargo & Co.	4430				Australia	Wesfarmers Ltd.	10200
	Yichun Tantalum Co Ltd	Yichun	9787				Australia	Mineral Resources Limited	468.928				USA	Wellington Management Group LLP	2976				Australia	Sayona Mining Ltd.	9510.75
	Bikita Minerals (PTY) Ltd	Bikita	5505				Australia	Neometals Ltd	150.144				Salar del Hombre Muerto	Wellington Management Group LLP	2816.75				Australia	Core Lithium Ltd	8161
	Sichuan Mineral Industry Co., Ltd.	Jiajika	4856				Tianqi Lithium Corporation	Greenbushes	50117.7				China	Wei Ping Jiang	2210				China	Youngy Invt Hldg Grp Co.Ltd.	8088
	Rockwood Holdings Inc.	Silver Peak	3961				Albemarle Corporation	Greenbushes	48152.3				Greenbushes	Wei Ping Jiang	2090.4				China	Zhejiang Huayou Cobalt Co. Ltd	7424
	Galaxy Resources Ltd.	Mt Cattlin	3651				SQM	Salar de Atacama(SQM)	44000				China	Wanjia Asset Management Co. Ltd.	957.695				China	Qinghai Hengxin Rongliye Technology Co., Ltd.	6000
	Western Mining Group Co. Ltd.	East Taijinair	2970				Albemarle Corporation	Salar de Atacama(Albemarle)	27154				Mount Marion	Wanjia Asset Management Co. Ltd.	618				Japan	Toyota Tsusho Corp	5209
	Tibet Mineral Dev. Co. LTD	Zhabuye	2592				FMC Corp.	Salar del Hombre Muerto	18197				USA	Victory Capital Management Inc.	72200				China	Qinghai Zhongxin Guoan Technology development Co., LTD	5000
	Qinghai Zhongxin Guoan Technology development Co., LTD	West Taijinair	1980				Yichun Tantalum Co Ltd	Yichun	9787				Salar del Hombre Muerto	Victory Capital Management Inc.	44370				China	China Minmetals Corp.	4821.54
	Grupo Mota	Alvarroes	1280				Western Mining Group Co., Ltd.	East Taijinair	8421				Mount Marion	Victory Capital Management Inc.	42630				China	Tibet Mineral Dev. Co. LTD	4800
	Companhia Brasileira de Lítio	Cachoeira	606				Galaxy Resources Ltd.	Mt Cattlin	8125				USA	Vanguard Group Inc.	40000				USA	Piedmont Lithium Inc	3170.25
	Qinghai Salt Lake Industry Co.	Chaerhan Lake	451				Lithium Americas (Argentina) Corp.	Cauchari-Olaroz	6862.5				Greenbushes	Vanguard Group Inc.	31078				China	Zijin Mining Group Co. Ltd.	2839.98
	Talison Lithium Ltd.	RCF Management LLC	19705.4				SQM	Cauchari-Olaroz	6862.5				Atacama(Albemarle)	Vanguard Group Inc.	31078				Argentina	Jujuy Energia y Mineria	2281.06
	SQM	Nutrien Ltd.	13117.9				Allkem Limited	Salar de Olaroz	4590.49				Salar del Hombre Muerto	Vanguard Group Inc.	26834				China	Chengxin Lithium Group	2226
	Talison Lithium Ltd.	Tianqi Lithium Corp.	10893.1				Albemarle Corporation	Silver Peak	3849				Mount Marion	Vanguard Group Inc.	20539				Brazil	Companhia Brasileira de Lítio	2210
	Yichun Tantalum Co Ltd	Jiangxi Tungsten Holding Group Co., LTD	9787				Sinomine International Exploration (Hong Kong) Co. Ltd.	Bikita	3842.82				Silver Peak	Vanguard Group Inc.	19801				Portugal	Grupo Mota	1236
	SQM	Inversiones SQYA S.A	9712.9				Qinghai Salt Lake Industry Co.,Ltd	Chaerhan Lake	3727				Atacama(SQM)	Vanguard Group Inc.	15988				Hong Kong, China	Revotech Asia Ltd	1150
	Talison Lithium Ltd.	Royal Bank of Canada	7331.77				Qinghai Zhongxin Guoan Technology development Co., LTD	West Taijinair	1980				Pilgangoora	Vanguard Group Inc.	13502				China	Tibet Summit Resources Co	1125
	Bikita Minerals (PTY) Ltd	Zimbabwe Firms	5505				Toyota Tsusho Corporation	Salar de Olaroz	1725.75				Salar de Olaroz	Vanguard Group Inc.	10000				SQM	Atacama(SQM)	165500
	Sichuan Mineral Industry Co., Ltd.	China Firms	4856				Grupo Mota	Alvarroes	1595				Mibra	Vanguard Group Inc.	9787				Albemarle Corp.	Greenbushes	103880
	Rockwood Holdings Inc.	T. Rowe Price Group Inc.	4289.18				Tibet Mineral Development Co., LTD	Zhabuye	1442.4				USA	Van Eck Associates Corp.	9454				Pilbara Minerals Ltd.	Pilgangoora	90215
	Western Mining Group Co. Ltd.	China Firms	2970				Jujuy Energia y Mineria Sociedad del Estado	Cauchari-Olaroz	1275				Mt Cattlin	Van Eck Associates Corp.	8059				Tianqi Lithium Corp.	Greenbushes	55141.2
	Talison Lithium Ltd.	RBC Dominion Securities Inc.	2862.83				Companhia Brasileira de Lítio	Cachoeira	688				Pilgangoora	Van Eck Associates Corp.	7492.56				IGO Ltd	Greenbushes	52978.8
	SQM	Nitratos de Chile SA	2790.95				Jujuy Energia y Mineria Sociedad del Estado	Salar de Olaroz	586.755				Mount Marion	Van Eck Associates Corp.	6677				Albemarle Corp.	Atacama(Albemarle)	50000
	Talison Lithium Ltd.	Goldman Sachs Group Inc.	2585.47				Ganfeng Lithium Group Co., Ltd.	Mount Marion	468.928				Salar del Hombre Muerto	Van Eck Associates Corp.	6148.66				Albemarle Corp.	Wodgina	33788.5
	Rockwood Holdings Inc.	Morgan Stanley Investment Management Inc.	2099.35				Mineral Resources Limited	Mount Marion	468.928				Mibra	Van Eck Associates Corp.	5000				Mineral Resources Ltd.	Wodgina	33788.5
	Rockwood Holdings Inc.	Atlantic Investment Management Inc.	2061.67				Tianqi Lithium Corporation	Zhabuye	360.6				Switzerland	UBS Asset Management AG	4430				Pilbara Minerals Ltd.	Altura	32717
	Talison Lithium Ltd.	CIBC Mellon Trust Co.	2030.82				Neometals Ltd	Mount Marion	150.144				Greenbushes	UBS Asset Management AG	2976				Qinghai Salt Lake Industry Co.	Chaerhan Lake	30831
	Qinghai Zhongxin Guoan Technology development Co., LTD	Zhongxin Guoan	1980				Tianqi Lithium Corporation	Chengdu Tianqi Industry Group Co. Ltd.	18076.3				Atacama(Albemarle)	UBS Asset Management AG	2816.75				Arcadium Lithium plc	Salar del Hombre Muerto	27994
	Talison Lithium Ltd.	Merrill Lynch Pierce Fenner & Smith Inc.	1974.75				SQM	Nutrien Ltd.	16276.1				USA	U.S. Bancorp Asset Management Inc.	2210				Arcadium Lithium plc	Mt Cattlin	27005
	FMC Corp.	Capital Research & Mgmt Co.	1615.21				SQM	Inversiones SQYA S.A	15243.5				Greenbushes	U.S. Bancorp Asset Management Inc.	2090.4				Ganfeng Lithium Group	Mount Marion	25719
	Rockwood Holdings Inc.	Iridian Asset Management LLC	1550.57				Yichun Tantalum Co Ltd	Jiangxi Tungsten Holding Group Co., LTD	9787				Atacama(Albemarle)	U.S. Bancorp Asset Management Inc.	1000				Mineral Resources Ltd.	Mount Marion	25719
	Rockwood Holdings Inc.	Vanguard Group Inc.	1441.74				Western Mining Group Co., Ltd.	China Firms	8421				Japan	Toyota Tsusho Corp.	957.695				Sinomine Resource Grp Co Ltd	Bikita	21506.6
	SQM	Global Mining Investments (Chile ) S.A.	1370.39				Albemarle Corporation	Vanguard Group Inc.	8137.16				Salar de Olaroz	Toyota Tsusho Corp.	618				Yichun Tantalum Co Ltd	Yichun	13975
	Rockwood Holdings Inc.	Barrow Hanley Mewhinney & Strauss LLC	1342.11				Albemarle Corporation	Franklin Resources Inc.	5813.59				Japan	Toyota Motor Corp.	522.6				Allkem Ltd	Salar de Olaroz	13855.9
	Grupo Mota	Portugal Firms	1280				Albemarle Corporation	BlackRock Inc.	5744.58				Salar de Olaroz	Toyota Motor Corp.	18670.9				Sigma Lithium Corp.	Grota do Cirilo	13742
	Rockwood Holdings Inc.	BlackRock Inc.	1272.76				Albemarle Corporation	State Street Global Advisors Inc.	4452.23				Japan	Toyota Industries Corp.	17459.9				AMG Critical Materials N.V.	Mibra	13206
	FMC Corp.	BlackRock Inc.	1176.11				Sinomine International Exploration (Hong Kong) Co. Ltd.	China Firms	3842.82				Salar de Olaroz	Toyota Industries Corp.	13490.2				Zangge Mining Co.	Qarhan Lake	12000
	Rockwood Holdings Inc.	Jana Partners Management LP	1172.68				Albemarle Corporation	Jennison Associates LLC	3528.19				China	Tibet Zangge Venture Capital Group Co. Ltd.	10532				Western Mining Group Co. Ltd.	East Taijinair	11942
	Talison Lithium Ltd.	AQR Arbitrage LLC	1022.08				SQM	SailingStone Capital Partners LLC	3367.07				Qarhan Lake	Tibet Zangge Venture Capital Group Co. Ltd.	9787				SQM	Mt Holland - Lithium	10200
	Rockwood Holdings Inc.	Cadian Capital Management LP	996.367				Albemarle Corporation	Capital Research & Mgmt Co.	2916.05				China	Tibet Mining Asset Operation Co. Ltd.	9454				Wesfarmers Ltd.	Mt Holland - Lithium	10200
	SQM	BlackRock Inc.	973.549				Tianqi Lithium Corporation	Wei Ping Jiang	2584.84				Zhabuye	Tibet Mining Asset Operation Co. Ltd.	8059				Lithium Americas (Argentina) C	Pastos Grandes	10000
	FMC Corp.	FMR LLC	972.314				Tianqi Lithium Corporation	China Universal Asset Management Co. Ltd.	2029.94				China	Tianqi Lithium Corp.	6589.49				Sayona Mining Ltd.	North American Lithium	9510.75
	Rockwood Holdings Inc.	Axon Capital LP	924.287				Qinghai Zhongxin Guoan Technology development Co., LTD	Zhongxin Guoan	1980				Atacama(SQM)	Tianqi Lithium Corp.	6541.92				Core Lithium Ltd	Finniss	8161
	FMC Corp.	Vanguard Group Inc.	862.061				Jujuy Energia y Mineria Sociedad del Estado	Argentina Firms	1861.76				USA	Thornburg Investment Management Inc.	6000				Youngy Invt Hldg Grp Co.Ltd.	Jiajika	8088
	Rockwood Holdings Inc.	Allianz Asset Management GmbH	702.934				Albemarle Corporation	Teachers Insurance and Annuity Association-College Retirement Equities Fund	1854.9				Mount Marion	Thornburg Investment Management Inc.	4974.32				Zhejiang Huayou Cobalt Co. Ltd	Arcadia	7424
	Rockwood Holdings Inc.	Fred Alger Management LLC	701.116				FMC Corp.	Vanguard Group Inc.	1757.83				USA	Teachers Insurance and Annuity Association-College Retirement Equities Fund	4868.44				Toyota Tsusho Corp	Salar de Olaroz	5209
	Galaxy Resources Ltd.	PPM America Inc.	674.241				Grupo Mota	Portugal Firms	1595				Greenbushes	Teachers Insurance and Annuity Association-College Retirement Equities Fund	3954.1				Albemarle Corp.	Silver Peak	5000
	SQM	T. Rowe Price Group Inc.	666.481				Albemarle Corporation	FMR LLC	1461.13				Atacama(Albemarle)	Teachers Insurance and Annuity Association-College Retirement Equities Fund	3654.77				Qinghai Hengxin Rongliye Technology Co., Ltd.	West Taijinai Lake	5000
	Rockwood Holdings Inc.	First Eagle Investment Management LLC	631.225				Albemarle Corporation	Iridian Asset Management LLC	1393.74				Mount Marion	Teachers Insurance and Annuity Association-College Retirement Equities Fund	3639.28				Qinghai Zhongxin Guoan Technology development Co., LTD	West Taijinair	5000
	Companhia Brasileira de Lítio	Brazil Firms	606				Albemarle Corporation	Columbia Management Investment Advisers LLC	1321.06				USA	T. Rowe Price Group Inc.	3259.24				China Minmetals Corp.	Qinghai Yiliping	4821.54
	Rockwood Holdings Inc.	FMR LLC	597.371				FMC Corp.	Glenview Capital Management LLC	1300				Greenbushes	T. Rowe Price Group Inc.	3163.01				Tibet Mineral Dev. Co. LTD	Zhabuye	4800
	FMC Corp.	State Street Global Advisors Inc.	588.694				Tianqi Lithium Corporation	Central Huijin Asset Management Ltd.	1222.87				Atacama(Albemarle)	T. Rowe Price Group Inc.	3105.37				Ganfeng Lithium Group	Qinghai Yiliping	4632.46
	SQM	Kowa Company Ltd.	575.346				FMC Corp.	BlackRock Inc.	1169.97				Netherlands	Stichting Pensioenfonds ABP	2976				Allkem Ltd	Sal de Vida	4478
	FMC Corp.	JP Morgan Asset Management	542.711				Albemarle Corporation	Egerton Capital (UK) LLP	1145.38				Greenbushes	Stichting Pensioenfonds ABP	2462.3				Sinomine Resource Grp Co Ltd	Tanco	4045
	Talison Lithium Ltd.	Longfellow Investment Management Co. LLC	523.754				FMC Corp.	Capital Research & Mgmt Co.	1022.13				Atacama(Albemarle)	Stichting Pensioenfonds ABP	2340.62				Piedmont Lithium Inc	North American Lithium	3170.25
	SQM	Morgan Stanley Investment Management Inc.	488.534				Qinghai Salt Lake Industry Co.,Ltd	Qinghai State-owned Assets Investment and Management Co. Ltd.	1007.41				USA	State Street Global Advisors Inc.	2318.51				Ganfeng Lithium Group	Cauchari-Olaroz	2799.6
	Rockwood Holdings Inc.	Sculptor Capital Management Inc.	488.289				Albemarle Corporation	BNY Asset Management	965.592				Greenbushes	State Street Global Advisors Inc.	2303.73				Lithium Americas (Argentina) C	Cauchari-Olaroz	2690.4
	Tibet Mineral Dev. Co. LTD	Tibet Mining Asset Operation Co. Ltd.	458.525				Albemarle Corporation	Dimensional Fund Advisors LP	924.258				Atacama(Albemarle)	State Street Global Advisors Inc.	2233.51				Chengxin Lithium Group	Sabi Star	2226
	Rockwood Holdings Inc.	Gates Capital Management Inc.	458.304				Albemarle Corporation	Janus Henderson Investors US LLC	895.883				Salar del Hombre Muerto	State Street Global Advisors Inc.	2210				Companhia Brasileira de Lítio	Cachoeira	2210
	Rockwood Holdings Inc.	D.E. Shaw & Co. LP	449.396				FMC Corp.	State Street Global Advisors Inc.	856.962				Silver Peak	State Street Global Advisors Inc.	2155.09				Zijin Mining Group Co. Ltd.	Xiangyuan	1915.98
	Rockwood Holdings Inc.	Southpoint Capital Advisors LP	387.914				Albemarle Corporation	Putnam LLC	826.824				Atacama(SQM)	State Street Global Advisors Inc.	2119.98				Jujuy Energia y Mineria	Salar de Olaroz	1771.06
	Talison Lithium Ltd.	Global X Management Co. LLC	372.615				Albemarle Corporation	Northern Trust Global Investments	824.954				Mount Marion	State Street Global Advisors Inc.	2068.78				Grupo Mota	Alvarroes	1236
	FMC Corp.	Cramer Rosenthal McGlynn LLC	368.523				FMC Corp.	Barrow Hanley Mewhinney & Strauss LLC	798.118				Netherlands	SPF Beheer BV	1931.04				Tianqi Lithium Corp.	Zhabuye	1200
	SQM	Vanguard Group Inc.	364.704				Lithium Americas (Argentina) Corp.	George Ring Ireland	765.855				Greenbushes	SPF Beheer BV	1871.38				Revotech Asia Ltd	Sal de los Angeles	1150
	SQM	Baillie Gifford & Co.	354.461				Qinghai Salt Lake Industry Co.,Ltd	Sinochem Holdings Corporation Ltd.	764.622				Atacama(Albemarle)	SPF Beheer BV	1832.76				Tibet Summit Resources Co	Sal de los Angeles	1125
	Rockwood Holdings Inc.	ClearBridge Investments LLC	335.813				SQM	FMR LLC	752.854				Silver Peak	SPF Beheer BV	1828.09				Qinghai Hengxin Rongliye Technology Co., Ltd.	Jintaier Lake	1000
	Talison Lithium Ltd.	Vertex One Asset Management Inc.	333.298				Albemarle Corporation	Geode Capital Management LLC	701.46				China	Sinochem Holdings Corporation Ltd.	1808.3				Zijin Mining Group Co. Ltd.	Lakkor Tso Salt Lake	924
	SQM	Neuberger Berman BD LLC prior to change in line of business	332.457				FMC Corp.	FMR LLC	698.395				Chaerhan Lake	Sinochem Holdings Corporation Ltd.	1802.19				Jujuy Energia y Mineria	Cauchari-Olaroz	510
	FMC Corp.	RS Investment Management Co. LLC	329.593				Albemarle Corporation	Bank of America Corp.	695.969				China	Sichuan Yonghong Industrial Co., Ltd.	1704.4				SQM	Inversiones SQYA S.A	43819.6
	Rockwood Holdings Inc.	Invesco Ltd.	321.197				Companhia Brasileira de Lítio	Brazil Firms	688				Qarhan Lake	Sichuan Yonghong Industrial Co., Ltd.	1614.89				SQM	Tianqi Lithium Corp.	38944.7
	Rockwood Holdings Inc.	State Street Global Advisors Inc.	305.427				Albemarle Corporation	Columbus Circle Investors	676.008				China	Shenzhen Qianyuan Investment Co., Ltd.	1590				Albemarle Corp.	Vanguard Group Inc.	23120.2
	Rockwood Holdings Inc.	Allianz Global Investors U.S. LLC	298.902				Albemarle Corporation	SPF Beheer BV	670.987				Greenbushes	Shenzhen Qianyuan Investment Co., Ltd.	1519.37				Albemarle Corp.	Capital Research and Management Co.	21373.2
	SQM	Van Eck Associates Corp.	276.567				SQM	Kowa Company Ltd.	628.266				China	Shenzhen Oriental Fortune Venture Capital Management Co. Ltd.	1500.13				Albemarle Corp.	BlackRock Inc.	16724.2
	FMC Corp.	Janus Henderson Investors US LLC	273.959				Albemarle Corporation	Norges Bank Investment Management	601.854				Bikita	Shenzhen Oriental Fortune Venture Capital Management Co. Ltd.	1490.14				Tianqi Lithium Corp.	Chengdu Tianqi Industry Group Co. Ltd.	14305
	Rockwood Holdings Inc.	American Century Investment Management Inc	271.353				Albemarle Corporation	Westwood Management Corp.	575.628				China	Shenzhen Gemboom Investment Management Co., Ltd.	1420.37				Yichun Tantalum Co Ltd	Jiangxi Tungsten Holding Group Co., LTD	13975
	FMC Corp.	LSV Asset Management	269.07				Tianqi Lithium Corporation	New China Life Insurance Co. Ltd.	569.928				Mount Marion	Shenzhen Gemboom Investment Management Co., Ltd.	1396.53				Pilbara Minerals Ltd.	State Street Global Advisors Inc.	12194.9
	Rockwood Holdings Inc.	Adage Capital Management LP	267.816				Albemarle Corporation	OppenheimerFunds Inc.	566.144				USA	Shapiro Capital Management LLC	1375.88				Western Mining Group Co. Ltd.	China Firms	11942
	Rockwood Holdings Inc.	William Blair Investment Management LLC	264.936				Albemarle Corporation	Adage Capital Management LP	555.733				Greenbushes	Shapiro Capital Management LLC	1358.66				Albemarle Corp.	State Street Global Advisors Inc.	9191.14
	Rockwood Holdings Inc.	Seifollah Ghasemi	261.706				Albemarle Corporation	AGF Management Ltd.	512.891				Atacama(Albemarle)	Shapiro Capital Management LLC	1356.37				Albemarle Corp.	Franklin Resources Inc.	8496.53
	Rockwood Holdings Inc.	Massachusetts Financial Services Company	258.182				SQM	BlackRock Inc.	511.09				China	Shanghai Rosefinch Asset Management Co., Ltd.	1202.3				Youngy Invt Hldg Grp Co.Ltd.	China Firms	8088
	SQM	Administradora de Fondos de Pensiones Cuprum SA	245.717				SQM	Vanguard Group Inc.	508.798				Mount Marion	Shanghai Rosefinch Asset Management Co., Ltd.	1125.25				Pilbara Minerals Ltd.	BlackRock Inc.	7764.8
	Galaxy Resources Ltd.	Creat Resources Holdings Ltd.	244.775				FMC Corp.	Jennison Associates LLC	508.598				USA	SEI Investments Co.	1117.83				Arcadium Lithium plc	BlackRock Inc.	7600.86
	Talison Lithium Ltd.	Water Island Capital LLC	231.67				Albemarle Corporation	OFI Advisors LLC	484.298				Atacama(SQM)	SEI Investments Co.	1114.97				Arcadium Lithium plc	Vanguard Group Inc.	7167.93
	FMC Corp.	Luther King Capital Management Corp.	224.009				Albemarle Corporation	Deutsche Asset & Wealth Management	478.987				Canada	Scotia Asset Management LP	1092.93				Pilbara Minerals Ltd.	Ganfeng Lithium Group Co. Ltd.	7055.57
	SQM	Scout Investments Inc.	218.099				Albemarle Corporation	First Eagle Investment Management LLC	470.843				Greenbushes	Scotia Asset Management LP	1075.65				Pilbara Minerals Ltd.	JPMorgan Chase & Co.	6992.49
	FMC Corp.	Sasco Capital Inc.	213.255				FMC Corp.	Columbia Management Investment Advisers LLC	464.384				Atacama(Albemarle)	Scotia Asset Management LP	1067.24				SQM	State Street Global Advisors Inc.	6958.35
	SQM	ClariVest Asset Management LLC	205.825				Albemarle Corporation	Anchor Bolt Capital LP	460.889				Switzerland	Schweizerische Nationalbank	1009.6				Mineral Resources Ltd.	Christopher James Ellison	6885.02
	Rockwood Holdings Inc.	Corvex Management LP	204.669				Tianqi Lithium Corporation	Bihua Zhang	438.458				Greenbushes	Schweizerische Nationalbank	999.47				Ganfeng Lithium Group	Liangbin Li	6517.5
	FMC Corp.	American Century Investment Management Inc	199.189				Albemarle Corporation	Macquarie Investment Management Business Trust	427				Atacama(Albemarle)	Schweizerische Nationalbank	978.092				SQM	BlackRock Inc.	6503.04
	FMC Corp.	Jennison Associates LLC	195.759				Albemarle Corporation	DWS Investment Management Americas Inc.	394.792				South Korea	Samsung Asset Management Co. Ltd.	957.695				Pilbara Minerals Ltd.	Australian Super Pty Ltd	6266.04
	SQM	William Blair Investment Management LLC	194.657				FMC Corp.	Luther King Capital Management Corp.	389.622				Mount Marion	Samsung Asset Management Co. Ltd.	953.85				Pilbara Minerals Ltd.	Vanguard Group Inc.	6064.74
	Rockwood Holdings Inc.	Standard Investments LLC	192.017				Albemarle Corporation	DJE Kapital AG	387.607				United Kingdom	RWC Partners Ltd.	930.393				Sigma Lithium Corp.	A0 Investimentos Ltda.	6020.37
	FMC Corp.	Frontier Capital Management Co LLC	189.872				FMC Corp.	Pzena Investment Management Inc.	386.687				Atacama(SQM)	RWC Partners Ltd.	874.32				Qinghai Hengxin Rongliye Technology Co., Ltd.	China Firms	6000
	Talison Lithium Ltd.	David Andrew Shaw	189.127				Tianqi Lithium Corporation	Yinhua Fund Management Co. Ltd.	382.967				United Kingdom	Ruffer LLP	870.6				Albemarle Corp.	PRIMECAP Management Co.	5707.48
	Rockwood Holdings Inc.	Amundi Asset Management SAS	187.143				Albemarle Corporation	Security Investors LLC	381.056				Salar del Hombre Muerto	Ruffer LLP	861.675				Pilbara Minerals Ltd.	Citigroup Inc.	5046.78
	FMC Corp.	Northern Trust Global Investments	183.454				Toyota Tsusho Corporation	Toyota Motor Corp.	374.488				USA	Royce & Associates LP	856.535				Qinghai Zhongxin Guoan Technology development Co., LTD	Zhongxin Guoan	5000
	Talison Lithium Ltd.	Syquant Capital SAS	179.457				Albemarle Corporation	Tide Point Capital Management LP	361.72				Salar del Hombre Muerto	Royce & Associates LP	842.885				China Minmetals Corp.	China Firms	4821.54
	FMC Corp.	Iridian Asset Management LLC	177.144				SQM	Abrdn Holdings Limited	359.103				Canada	Royal Bank of Canada	836.819				IGO Ltd	Yandal Investments Pty. Ltd..	4704.59
	Rockwood Holdings Inc.	RS Investment Management Co. LLC	175.457				FMC Corp.	LSV Asset Management	354.953				Greenbushes	Royal Bank of Canada	825.467				IGO Ltd	Fidelity International Ltd.	4630.35
	FMC Corp.	Wellington Management Group LLP	173.575				Tianqi Lithium Corporation	Shenzhen Qianyuan Investment Co., Ltd.	353.324				Atacama(Albemarle)	Royal Bank of Canada	820.42				Arcadium Lithium plc	Wellington Management Group LLP	4493.8
	FMC Corp.	SailingStone Capital Partners LLC	172.101				Albemarle Corporation	Point7 Asset Management LP	342.748				China	Rosefinch Fund Management Co. Ltd.	812.47				Albemarle Corp.	Geode Capital Management LLC	4310.57
	FMC Corp.	Teachers Insurance and Annuity Association-College Retirement Equities Fund	159.138				SQM	Adage Capital Management LP	339.166				Mount Marion	Rosefinch Fund Management Co. Ltd.	806.71				Albemarle Corp.	Norges Bank Investment Management	4287.53
	Rockwood Holdings Inc.	Brown Advisory Inc.	156.238				FMC Corp.	Fairpointe Capital LLC	329.139				Switzerland	RobecoSAM AG	778.688				SQM	Administradora de Fondos de Pensiones Habitat SA	4190.29
	Galaxy Resources Ltd.	Vanguard Group Inc.	154.437				FMC Corp.	Foord Asset Management Guernsey Ltd	319.642				Salar del Hombre Muerto	RobecoSAM AG	755.034				SQM	Administradora de Fondos de Pensiones Cuprum SA	4020.29
	FMC Corp.	Columbia Wanger Asset Management LLC	151.826				FMC Corp.	MultiConcept Fund Management S.A.	319.642				Atacama(SQM)	RobecoSAM AG	723.571				Albemarle Corp.	Baillie Gifford & Co.	3867.52
	Rockwood Holdings Inc.	Norges Bank Investment Management	146.051				Albemarle Corporation	Edge Asset Management Inc.	316.382				Australia	Richard Phillip Seville	704.031				Mineral Resources Ltd.	BlackRock Inc.	3814.73
	Rockwood Holdings Inc.	Two Sigma Investments LP	144.27				Albemarle Corporation	Legal & General Investment Management Ltd.	312.813				Salar de Olaroz	Richard Phillip Seville	702.862				Mineral Resources Ltd.	State Street Global Advisors Inc.	3622.78
	Qinghai Salt Lake Industry Co.	Qinghai State-owned Assets Investment and Management Co. Ltd.	139.765				FMC Corp.	T. Rowe Price Group Inc.	307.97				USA	Renaissance Technologies LLC	692.699				Qinghai Salt Lake Industry Co.	Qinghai State-owned Assets Investment and Management Co. Ltd.	3622.64
	Rockwood Holdings Inc.	Serengeti Asset Management LP	139.547				Albemarle Corporation	Charles Schwab Investment Management Inc.	307.64				Salar del Hombre Muerto	Renaissance Technologies LLC	691.244				Sinomine Resource Grp Co Ltd	China Nonferrous Metal Mining (Group) Co. Ltd.	3610.44
	Rockwood Holdings Inc.	Denver Investment Advisors LLC	137.58				Galaxy Resources Ltd.	Paradice Investment Management Pty Ltd.	298.053				USA	RCF Management LLC	674.023				SQM	Administradora de Fondos de Pensiones Capital SA	3477.66
	Rockwood Holdings Inc.	UBS Asset Management AG	137.463				Albemarle Corporation	Stelliam Investment Management LP	297.953				Pilgangoora	RCF Management LLC	636.384				Arcadium Lithium plc	Millennium Management LLC	3401.12
	FMC Corp.	BNY Asset Management	137.309				Tianqi Lithium Corporation	China Asset Management Co. Ltd.	295.502				China	Qinghai State-owned Assets Investment and Management Co. Ltd.	628.305				IGO Ltd	BlackRock Inc.	3387.56
	Rockwood Holdings Inc.	Mackenzie Financial Corp.	135.416				Tianqi Lithium Corporation	Lichun Chen	288.078				Chaerhan Lake	Qinghai State-owned Assets Investment and Management Co. Ltd.	622.776				SQM	Vanguard Group Inc.	3387.1
	Rockwood Holdings Inc.	NLG Capital Inc.	135.134				Tibet Mineral Development Co., LTD	Tibet Mining Asset Operation Co. Ltd.	287.47				USA	Putnam LLC	618				IGO Ltd	State Street Global Advisors Inc.	3362.28
	SQM	Frank Russell Co.	134.583				Albemarle Corporation	Principal Global Investors LLC	286.102				Greenbushes	Putnam LLC	614.483				Pilbara Minerals Ltd.	Posco Holdings Inc.	3353.02
	Rockwood Holdings Inc.	BNY Asset Management	133.952				Albemarle Corporation	Royce & Associates LP	277.933				Atacama(Albemarle)	Putnam LLC	611.516				SQM	AFP Provida SA	3237.97
	SQM	Federated Hermes, Inc.	133.54				FMC Corp.	Sculptor Capital Management Inc.	273.178				Silver Peak	Putnam LLC	595.945				Zangge Mining Co.	Tibet Zangge Venture Capital Group Co. Ltd.	2762.4
	SQM	State Street Global Advisors Inc.	132.078				Tianqi Lithium Corporation	Invesco Great Wall Fund Management Co. Ltd	271.817				USA	ProShare Advisors LLC	582.4				SQM	Kowa Company Ltd.	2612.24
	Rockwood Holdings Inc.	Teachers Insurance and Annuity Association-College Retirement Equities Fund	128.899				FMC Corp.	River Road Asset Management LLC	270.116				Greenbushes	ProShare Advisors LLC	572.615				Albemarle Corp.	Invesco Capital Management LLC	2510.91
	Rockwood Holdings Inc.	Riverbridge Partners LLC	126.582				SQM	Administradora de Fondos de Pensiones Cuprum SA	263.74				Atacama(Albemarle)	ProShare Advisors LLC	549.887				Albemarle Corp.	Mirae Asset Global Investments Co. Ltd.	2488.02
	FMC Corp.	Findlay Park Partners LLP	126.084				FMC Corp.	Thunderbird Partners LLP	262.17				Silver Peak	ProShare Advisors LLC	542.364				Albemarle Corp.	BNY Asset Management	2479.97
	FMC Corp.	STRS Ohio	124.042				SQM	Axiom Investors LLC	255.65				USA	Principal Global Investors LLC	531.913				Albemarle Corp.	Global X Management Co. LLC	2445.59
	SQM	GE Asset Management Inc.	122.443				SQM	Eaton Vance Management	253.709				Salar del Hombre Muerto	Principal Global Investors LLC	526.927				Pilbara Minerals Ltd.	T. Rowe Price Group Inc.	2415.01
	Rockwood Holdings Inc.	Northern Trust Global Investments	118.148				FMC Corp.	Sasco Capital Inc.	249.068				USA	PRIMECAP Management Co.	524.633				Mineral Resources Ltd.	Vanguard Group Inc.	2400.31
	Rockwood Holdings Inc.	Brighthouse Investment Advisers LLC	115.572				FMC Corp.	American Century Investment Management Inc	232.587				Greenbushes	PRIMECAP Management Co.	519.305				IGO Ltd	T. Rowe Price Group Inc.	2388.09
	FMC Corp.	Westfield Capital Management Co. L.P.	115.505				Qinghai Salt Lake Industry Co.,Ltd	China Cinda Asset Management Co. Ltd.	232.169				Atacama(Albemarle)	PRIMECAP Management Co.	518.444				Ganfeng Lithium Group	Xiaoshen Wang	2335.03
	Talison Lithium Ltd.	PineBridge Investments LLC	114.651				Allkem Limited	BlackRock Inc.	229.066				Silver Peak	PRIMECAP Management Co.	516.308				Qinghai Salt Lake Industry Co.	ICBC Financial Asset Investment Co. Ltd.	2334.15
	Talison Lithium Ltd.	Aegon Asset Management UK Plc	113.271				Allkem Limited	Janus Henderson Group PLC	226.858				China	Postal Savings Bank Of China Co. Ltd. Qinghai Branch	508.818				Tianqi Lithium Corp.	Weiping Jiang	2309.64
	Rockwood Holdings Inc.	GAMCO Investors Inc.	111.972				FMC Corp.	Russell Investment Management LLC	224.366				Chaerhan Lake	Postal Savings Bank Of China Co. Ltd. Qinghai Branch	508.001				Jujuy Energia y Mineria	Argentina Firms	2281.06
	SQM	Principal Global Investors LLC	110.365				Tianqi Lithium Corporation	Zhongrong International Trust Co. Ltd.	213.327				South Korea	Posco Holdings Inc.	503.615				Arcadium Lithium plc	Capital Research and Management Co.	2272.96
	SQM	Columbia Wanger Asset Management LLC	109.961				Tianqi Lithium Corporation	Fullgoal Fund Management Co. Ltd.	211.556				Pilgangoora	Posco Holdings Inc.	487.436				Arcadium Lithium plc	Van Eck Associates Corp.	2268.46
	Qinghai Salt Lake Industry Co.	Sinochem Holdings Corporation Ltd.	108.049				Allkem Limited	UBS Asset Management AG	202.189				Portugal	Portugal Firms	476.575				Arcadium Lithium plc	State Street Global Advisors Inc.	2255.2
	Talison Lithium Ltd.	Jennison Associates LLC	107.773				FMC Corp.	Northern Trust Global Investments	195.605				Alvarroes	Portugal Firms	472.402				Companhia Brasileira de Lítio	Brazil Firms	2210
	Rockwood Holdings Inc.	Renaissance Technologies LLC	104.865				SQM	Global X Management Co. LLC	194.528				China	Pingwei Wang	467.193				Albemarle Corp.	Dimensional Fund Advisors LP	2142.4
	FMC Corp.	Fairpointe Capital LLC	102.67				Toyota Tsusho Corporation	Toyota Industries Corp.	193.035				Bikita	Pingwei Wang	466.843				Zangge Mining Co.	Ningbo Meishan Bondedn Port Area Xinsha Hongyun Investment Management Co. Ltd.	2077.38
	Rockwood Holdings Inc.	ClearArc Capital Inc.	100.478				Allkem Limited	James Derrick Calaway	192.985				United Kingdom	Pictet Asset Management Ltd.	462.427				Arcadium Lithium plc	Grantham Mayo Van Otterloo & Co. LLC	2072.79
	Australia	Greenbushes	53000				SQM	Baron Capital Group Inc.	176.643				Greenbushes	Pictet Asset Management Ltd.	440.386				Mineral Resources Ltd.	Norges Bank Investment Management	2053.76
	Chile	Atacama(SQM)	41000				SQM	Macquarie Investment Management Business Trust	174.949				Atacama(Albemarle)	Pictet Asset Management Ltd.	435.956				Arcadium Lithium plc	Columbia Management Investment Advisers LLC	2042.22
	Chile	Atacama(Rockwood)	29208				FMC Corp.	Frontier Capital Management Co LLC	172.266				USA	Personal Capital Advisors Corp.	434.631				Qinghai Salt Lake Industry Co.	China Development Bank	2026.63
	Argentina	Salar del Hombre Muerto	14202				Albemarle Corporation	RBC Global Asset Management Inc.	169.199				Greenbushes	Personal Capital Advisors Corp.	431.365				SQM	abrdn PLC	1979.83
	China	Yichun	9787				Albemarle Corporation	Allspring Global Investments LLC	168.729				Atacama(Albemarle)	Personal Capital Advisors Corp.	431.281				IGO Ltd	Vanguard Group Inc.	1924.4
	Zimbabwe	Bikita	5505				Tianqi Lithium Corporation	National Council for Social Security Fund	166.306				USA	Peregrine Capital Management LLC	421.652				Albemarle Corp.	Northern Trust Global Investments	1917.38
	China	Jiajika	4856				Galaxy Resources Ltd.	Creat Resources Holdings Ltd.	164				Salar del Hombre Muerto	Peregrine Capital Management LLC	416.617				Albemarle Corp.	ProShare Advisors LLC	1852.63
	USA	Silver Peak	3961				Albemarle Corporation	Invesco Ltd.	158.645				USA	Payden & Rygel	411.825				Arcadium Lithium plc	Global X Management Co. LLC	1821.64
	Australia	Mt Cattlin	3651				FMC Corp.	Geode Capital Management LLC	158.632				Greenbushes	Payden & Rygel	404.637				IGO Ltd	First Sentier Investors (Australia) IM Ltd	1809.01
	China	East Taijinair	2970				Tianqi Lithium Corporation	Abu Dhabi Investment Authority	158.426				Australia	Paul Kevin Mantell	392.936				Qinghai Salt Lake Industry Co.	Sinochem Holdings Corporation Ltd.	1788.03
	China	Zhabuye	2592				FMC Corp.	Goldman Sachs Asset Management LP	152.657				Altura	Paul Kevin Mantell	391.681				Albemarle Corp.	Bank of America Corp.	1677.36
	China	West Taijinair	1980				Albemarle Corporation	New York State Common Retirement Fund	152.164				Australia	Paradice Investment Management Pty Ltd.	388.421				Albemarle Corp.	Amundi Asset Management SAS	1666.58
	Portugal	Alvarroes	1280				Neometals Ltd	Australia Firms	150.144				Mt Cattlin	Paradice Investment Management Pty Ltd.	387.341				Albemarle Corp.	Pictet Asset Management Ltd.	1636.11
	Brazil	Cachoeira	606				FMC Corp.	BNY Asset Management	150.107				China	Pacific Asset Management Co. Ltd.	383.987				Albemarle Corp.	RobecoSAM AG	1631.8
	China	Chaerhan Lake	451				Albemarle Corporation	Baring Asset Management Ltd.	144.522				Mount Marion	Pacific Asset Management Co. Ltd.	375.544				Pilbara Minerals Ltd.	Global X Management Co. LLC	1578.62
	RCF Management LLC	USA	19705.4				Albemarle Corporation	Nikko Asset Management Co. Ltd.	143.606				China	Orient Fund Management Co. Ltd.	374.228				Albemarle Corp.	EARNEST Partners LLC	1543.79
	Nutrien Ltd.	Canada	13117.9				FMC Corp.	Norges Bank Investment Management	142.756				Greenbushes	Orient Fund Management Co. Ltd.	370.086				Arcadium Lithium plc	Jane Street Group LLC	1530.68
	Tianqi Lithium Corp.	China	10893.1				Albemarle Corporation	UBS Asset Management AG	139.493				United Kingdom	Northern Trust Global Investments	366.72				Qinghai Salt Lake Industry Co.	Shaanxi Coal and Chemical Industry Group Co.Ltd.	1529.48
	Jiangxi Tungsten Holding Group Co., LTD	China	9787				Albemarle Corporation	Schweizerische Nationalbank	133.022				Greenbushes	Northern Trust Global Investments	366.106				Albemarle Corp.	Morgan Stanley	1466.77
	Inversiones SQYA S.A	Chile	9712.9				Albemarle Corporation	New Jersey Division of Investment	129.723				Atacama(Albemarle)	Northern Trust Global Investments	362.875				Qinghai Salt Lake Industry Co.	Bank of China Co. Ltd. Qinghai Branch	1436.21
	China Firms	China	7826				Lithium Americas (Argentina) Corp.	Franco Mignacco	127.634				Salar del Hombre Muerto	Northern Trust Global Investments	343.972				Albemarle Corp.	Legal & General Investment Management Ltd.	1410.47
	Royal Bank of Canada	Canada	7331.77				FMC Corp.	Massachusetts Financial Services Company	126.377				Atacama(SQM)	Northern Trust Global Investments	342.851				SQM	Norges Bank Investment Management	1401.07
	Zimbabwe Firms	Zimbabwe	5505				SQM	Renaissance Technologies LLC	126.369				Silver Peak	Northern Trust Global Investments	341.116				IGO Ltd	Norges Bank Investment Management	1329.88
	T. Rowe Price Group Inc.	USA	4955.66				Albemarle Corporation	Legg Mason, Inc.	125.441				Norway	Norges Bank Investment Management	326.388				Pilbara Minerals Ltd.	Van Eck Associates Corp.	1287.02
	BlackRock Inc.	USA	3422.42				Albemarle Corporation	Goldman Sachs Group Inc.	125.058				Mount Marion	Norges Bank Investment Management	321.846				Arcadium Lithium plc	Dimensional Fund Advisors LP	1283.7
	RBC Dominion Securities Inc.	Canada	2862.83				Albemarle Corporation	Deutsche Bank AG	123.249				Greenbushes	Norges Bank Investment Management	318.318				Albemarle Corp.	Perpetual Ltd.	1279.8
	Vanguard Group Inc.	USA	2822.95				Albemarle Corporation	Hardman Johnston Global Advisors LLC	122.388				Atacama(Albemarle)	Norges Bank Investment Management	316.637				Arcadium Lithium plc	Legal & General Investment Management Ltd.	1271.82
	Nitratos de Chile SA	Chile	2790.95				Albemarle Corporation	Hahn Capital Management LLC	121.747				Atacama(SQM)	Norges Bank Investment Management	316.597				SQM	Lazard Asset Management LLC	1250.74
	Morgan Stanley Investment Management Inc.	USA	2587.89				SQM	Dimensional Fund Advisors LP	118.408				Mt Cattlin	Norges Bank Investment Management	315.215				Albemarle Corp.	U.S. Bancorp Asset Management Inc.	1249.16
	Goldman Sachs Group Inc.	USA	2585.47				Albemarle Corporation	Scout Investments Inc.	117.33				Pilgangoora	Norges Bank Investment Management	311.017				Grupo Mota	Portugal Firms	1236
	Atlantic Investment Management Inc.	USA	2061.67				Ganfeng Lithium Group Co., Ltd.	Liangbin Li	116.763				Mibra	Norges Bank Investment Management	307.28				SQM	Grantham Mayo Van Otterloo & Co. LLC	1226.27
	CIBC Mellon Trust Co.	Canada	2030.82				SQM	Teachers Insurance and Annuity Association-College Retirement Equities Fund	114.872				Salar de Olaroz	Norges Bank Investment Management	305.799				Arcadium Lithium plc	Shapiro Capital Management LLC	1214.19
	Zhongxin Guoan	China	1980				SQM	STRS Ohio	111.787				Japan	Nomura Asset Management Co. Ltd.	300.055				Arcadium Lithium plc	Geode Capital Management LLC	1199.03
	Merrill Lynch Pierce Fenner & Smith Inc.	USA	1974.75				Allkem Limited	Richard Phillip Seville	110.376				Salar de Olaroz	Nomura Asset Management Co. Ltd.	296.231				Zangge Mining Co.	Yong Ming Xiao	1189.06
	Iridian Asset Management LLC	USA	1727.72				Allkem Limited	Vanguard Group Inc.	110.11				China	Ningbo Shanshan Co. Ltd.	294.683				Qinghai Salt Lake Industry Co.	Postal Savings Bank Of China Co. Ltd. Qinghai Branch	1185.56
	Capital Research & Mgmt Co.	USA	1615.21				Tianqi Lithium Corporation	Changsheng Fund Management Co. Ltd.	109.555				Altura	Ningbo Shanshan Co. Ltd.	294.128				Lithium Americas (Argentina) C	General Motors Co.	1185.28
	FMR LLC	USA	1569.69				Qinghai Salt Lake Industry Co.,Ltd	China Great Wall Asset Management Co. Ltd.	109.292				China	Ningbo Meishan Bondedn Port Area Xinsha Hongyun Investment Management Co. Ltd.	289.575				Toyota Tsusho Corp	Toyota Motor Corp.	1177.75
	Global Mining Investments (Chile ) S.A.	Chile	1370.39				FMC Corp.	DWS Investment GmbH	108.017				Qarhan Lake	Ningbo Meishan Bondedn Port Area Xinsha Hongyun Investment Management Co. Ltd.	288.835				SQM	Mirae Asset Global Investments Co. Ltd.	1166.04
	Barrow Hanley Mewhinney & Strauss LLC	USA	1342.11				Albemarle Corporation	GE Asset Management Inc.	106.991				Japan	Nikko Asset Management Co. Ltd.	287.74				Sayona Mining Ltd.	Piedmont Lithium Inc.	1154.3
	Portugal Firms	Portugal	1280				Lithium Americas (Argentina) Corp.	John Anthony Kanellitsas	106.164				Greenbushes	Nikko Asset Management Co. Ltd.	282.432				Revotech Asia Ltd	China Firms	1150
	Jana Partners Management LP	USA	1172.68				FMC Corp.	Goldman Sachs Group Inc.	106.106				Atacama(Albemarle)	Nikko Asset Management Co. Ltd.	281.701				Arcadium Lithium plc	Mirae Asset Global Investments Co. Ltd.	1130.8
	State Street Global Advisors Inc.	USA	1026.2				Galaxy Resources Ltd.	Anthony Peter Tse	105.428				USA	New York State Common Retirement Fund	280.555				Zhejiang Huayou Cobalt Co. Ltd	Zhejiang Huayou Holding Group Co., Ltd.	1129.93
	AQR Arbitrage LLC	USA	1022.08				Albemarle Corporation	California Public Employees' Retirement System	103.362				Greenbushes	New York State Common Retirement Fund	280.043				Allkem Ltd	Toyota Tsusho Corp.	1123.87
	Cadian Capital Management LP	USA	996.367				Albemarle Corporation	Davenport & Co. LLC	102.857				Atacama(Albemarle)	New York State Common Retirement Fund	277.201				SQM	Global X Management Co. LLC	1110.59
	Axon Capital LP	USA	924.287				Albemarle Corporation	California State Teachers' Retirement System	102.597				USA	New York Life Investment Management LLC	270.182				Albemarle Corp.	UBS Asset Management AG	1109.56
	Allianz Asset Management GmbH	Germany	702.934				Tianqi Lithium Corporation	China Southern Asset Management Co. Ltd.	102.367				Mt Cattlin	New York Life Investment Management LLC	269.008				Albemarle Corp.	Charles Schwab Investment Management Inc.	1096.49
	Fred Alger Management LLC	USA	701.116				Albemarle Corporation	Lord Abbett & Co. LLC	101.812				Australia	Nero Resource Fund Pty Ltd	266.598				Albemarle Corp.	First Trust Advisors LP	1096.18
	PPM America Inc.	USA	674.241				Albemarle Corporation	ZKB Asset Management	101.709				Mt Cattlin	Nero Resource Fund Pty Ltd	261.923				Albemarle Corp.	BNPP Asset Management Holding	1059.3
	First Eagle Investment Management LLC	USA	631.225				FMC Corp.	Cove Street Capital LLC	101.587				China	National Council for Social Security Fund	260.409				IGO Ltd	BNP Paribas Securities Corp.	1054.66
	Brazil Firms	Brazil	606				Galaxy Resources Ltd.	Charles Bernard Francis Whitfield	101.572				Mount Marion	National Council for Social Security Fund	259.441				Arcadium Lithium plc	Amundi Asset Management SAS	1039.12
	Kowa Company Ltd.	Japan	575.346				Albemarle Corporation	Morgan Stanley	100.941				Bikita	National Council for Social Security Fund	258.164				Arcadium Lithium plc	BNY Asset Management	1034.1
	JP Morgan Asset Management	USA	542.711				Albemarle Corporation	Lincoln Financial Investments Corp.	100.649				Canada	National Bank Trust Inc.	257.21				Tibet Mineral Dev. Co. LTD	Tibet Mining Asset Operation Co. Ltd.	983.04
	Longfellow Investment Management Co. LLC	USA	523.754				FMC Corp.	Janus Henderson Investors US LLC	100.341				Salar del Hombre Muerto	National Bank Trust Inc.	257.019				Albemarle Corp.	Eaton Vance Management	956.833
	RS Investment Management Co. LLC	USA	505.05				Mineral Resources Limited	Australia Firms	100				USA	Morgan Stanley	253.867				Albemarle Corp.	Coatue Management LLC	946.001
	Sculptor Capital Management Inc.	USA	488.289				Mineral Resources Limited	USA Firms	100				Salar del Hombre Muerto	Morgan Stanley	253.407				IGO Ltd	Fraserx PTY Ltd.	940.537
	American Century Investment Management Inc	USA	470.542				Australia	Greenbushes	98270				Atacama(SQM)	Morgan Stanley	250.417				Tianqi Lithium Corp.	China Securities Finance Corporation Ltd.	936.691
	William Blair Investment Management LLC	USA	459.592				Chile	Salar de Atacama(SQM)	44000				Greenbushes	Morgan Stanley	246.4				Albemarle Corp.	Citadel Advisors LLC	928.018
	Tibet Mining Asset Operation Co. Ltd.	China	458.525				Chile	Salar de Atacama(Albemarle)	27154				Japan	Mitsubishi UFJ Trust & Banking Corp.	245.397				Pilbara Minerals Ltd.	Geode Capital Management LLC	890.093
	Gates Capital Management Inc.	USA	458.304				Argentina	Salar del Hombre Muerto	18197				Greenbushes	Mitsubishi UFJ Trust & Banking Corp.	244.34				Albemarle Corp.	Allianz Global Investors U.S. LLC	889.601
	D.E. Shaw & Co. LP	USA	449.396				Argentina	Cauchari-Olaroz	15000				Atacama(Albemarle)	Mitsubishi UFJ Trust & Banking Corp.	244.257				Allkem Ltd	State Street Global Advisors Inc.	873.317
	Southpoint Capital Advisors LP	USA	387.914				China	Yichun	9787				South Korea	Mirae Asset Global Investments Co. Ltd.	241.788				Albemarle Corp.	FMR LLC	826.559
	Global X Management Co. LLC	USA	372.615				China	East Taijinair	8421				Greenbushes	Mirae Asset Global Investments Co. Ltd.	240.847				Pilbara Minerals Ltd.	Norges Bank Investment Management	793.615
	Cramer Rosenthal McGlynn LLC	USA	368.523				Australia	Mt Cattlin	8125				Atacama(Albemarle)	Mirae Asset Global Investments Co. Ltd.	240.203				SQM	Mondrian Investment Partners Ltd.	792.757
	Baillie Gifford & Co.	United Kingdom	354.461				Argentina	Salar de Olaroz	6903				Atacama(SQM)	Mirae Asset Global Investments Co. Ltd.	239.037				Arcadium Lithium plc	Principal Global Investors LLC	778.995
	ClearBridge Investments LLC	USA	335.813				Zimbabwe	Bikita	5193				Salar del Hombre Muerto	Mirae Asset Global Investments Co. Ltd.	238.906				Qinghai Salt Lake Industry Co.	China Construction Bank Corp.	776.802
	Vertex One Asset Management Inc.	Canada	333.298				USA	Silver Peak	3849				Silver Peak	Mirae Asset Global Investments Co. Ltd.	233.767				Albemarle Corp.	Managed Account Advisors LLC	766.623
	Neuberger Berman BD LLC prior to change in line of business	USA	332.457				China	Chaerhan Lake	3727				Australia	Mineral Resources Ltd.	232.856				Albemarle Corp.	Stichting Pensioenfonds ABP	764.845
	Invesco Ltd.	USA	321.197				China	West Taijinair	1980				Pilgangoora	Mineral Resources Ltd.	232.837				Albemarle Corp.	Goldman Sachs Asset Management LP	764.647
	Jennison Associates LLC	USA	303.532				China	Zhabuye	1803				USA	Millennium Management LLC	232.2				Pilbara Minerals Ltd.	BetaShares Capital Ltd.	752.452
	Northern Trust Global Investments	United Kingdom	301.601				Portugal	Alvarroes	1595				Atacama(SQM)	Millennium Management LLC	231.316				Albemarle Corp.	Canada Pension Plan Investment Board	737.968
	Allianz Global Investors U.S. LLC	USA	298.902				Australia	Mount Marion	1088				Salar del Hombre Muerto	Millennium Management LLC	231.138				IGO Ltd	Global X Management Co. LLC	707.715
	Teachers Insurance and Annuity Association-College Retirement Equities Fund	USA	288.037				Brazil	Cachoeira	688				China	Meichun Sun	230.646				Sinomine Resource Grp Co Ltd	Meichun Sun	700.846
	Van Eck Associates Corp.	USA	276.567				Chengdu Tianqi Industry Group Co. Ltd.	China	18076.3				Bikita	Meichun Sun	229.488				Qinghai Salt Lake Industry Co.	Agricultural Bank of China Ltd.	696.185
	Janus Henderson Investors US LLC	USA	273.959				Nutrien Ltd.	Canada	16276.1				Australia	Maxwell Terry Smith	228.306				IGO Ltd	Morgan Stanley	692.982
	BNY Asset Management	USA	271.261				Inversiones SQYA S.A	Chile	15243.5				Altura	Maxwell Terry Smith	228.057				Albemarle Corp.	JPMorgan Chase & Co.	684.202
	LSV Asset Management	USA	269.07				China Firms	China	12263.8				Australia	Martin Ronald Rowley	227.881				Arcadium Lithium plc	Northern Trust Global Investments	682.597
	Adage Capital Management LP	USA	267.816				Vanguard Group Inc.	USA	10513.9				Mt Cattlin	Martin Ronald Rowley	227.775				Sigma Lithium Corp.	Fitpart Fund Administration Services Ltd.	682.04
	Columbia Wanger Asset Management LLC	USA	261.787				Jiangxi Tungsten Holding Group Co., LTD	China	9787				United Kingdom	Marshall Wace LLP	227.344				Arcadium Lithium plc	American Century Investment Management Inc	680.539
	Seifollah Ghasemi	USA	261.706				BlackRock Inc.	USA	7654.71				Atacama(SQM)	Marshall Wace LLP	225.518				Pilbara Minerals Ltd.	JP Morgan Asset Management	670.729
	Massachusetts Financial Services Company	USA	258.182				Franklin Resources Inc.	USA	5813.59				USA	Mariner LLC	222.999				Sigma Lithium Corp.	BlackRock Inc.	667.831
	Administradora de Fondos de Pensiones Cuprum SA	Chile	245.717				State Street Global Advisors Inc.	USA	5309.19				Greenbushes	Mariner LLC	221.72				Arcadium Lithium plc	BNPP Asset Management Holding	667.434
	Creat Resources Holdings Ltd.	Australia	244.775				Jennison Associates LLC	USA	4036.79				Atacama(Albemarle)	Mariner LLC	221.339				Albemarle Corp.	Barclays Bank PLC	663.79
	Water Island Capital LLC	USA	231.67				Capital Research & Mgmt Co.	USA	3938.19				United Kingdom	Marathon Asset Management Ltd.	221.216				Albemarle Corp.	SEI Investments Co.	663.047
	Luther King Capital Management Corp.	USA	224.009				SailingStone Capital Partners LLC	USA	3367.07				Greenbushes	Marathon Asset Management Ltd.	219.644				SQM	RobecoSAM AG	660.977
	Scout Investments Inc.	USA	218.099				FMR LLC	USA	2912.38				Atacama(Albemarle)	Marathon Asset Management Ltd.	219.336				Albemarle Corp.	Columbia Management Investment Advisers LLC	658.018
	Sasco Capital Inc.	USA	213.255				Wei Ping Jiang	China	2584.84				USA	Managed Account Advisors LLC	218.704				Zijin Mining Group Co. Ltd.	Minxi Xinghang State-owned Assets Investment Operation Co.Ltd.	657.171
	ClariVest Asset Management LLC	USA	205.825				China Universal Asset Management Co. Ltd.	China	2029.94				Greenbushes	Managed Account Advisors LLC	217.706				Mineral Resources Ltd.	Global X Management Co. LLC	643.266
	Corvex Management LP	USA	204.669				Zhongxin Guoan	China	1980				Atacama(Albemarle)	Managed Account Advisors LLC	217.601				SQM	Macquarie Investment Management Business Trust	641.657
	Standard Investments LLC	USA	192.017				Teachers Insurance and Annuity Association-College Retirement Equities Fund	USA	1969.77				Australia	Magellan Asset Management Ltd.	216.106				Albemarle Corp.	Polygon Global Partners LLP	639.619
	Frontier Capital Management Co LLC	USA	189.872				Argentina Firms	Argentina	1861.76				Mount Marion	Magellan Asset Management Ltd.	214.939				SQM	CI Global Asset Management	636.406
	David Andrew Shaw	Canada	189.127				Columbia Management Investment Advisers LLC	USA	1785.45				USA	Macquarie Investment Management Business Trust	214.04				Arcadium Lithium plc	Morgan Stanley	623.885
	Amundi Asset Management SAS	France	187.143				Portugal Firms	Portugal	1595				Atacama(SQM)	Macquarie Investment Management Business Trust	210.635				Albemarle Corp.	Voya Investment Management LLC	623.883
	Syquant Capital SAS	France	179.457				Iridian Asset Management LLC	USA	1393.74				USA	LMCG Investments LLC	206.008				Mineral Resources Ltd.	Teachers Insurance and Annuity Association-College Retirement Equities Fund	623.055
	Wellington Management Group LLP	USA	173.575				Glenview Capital Management LLC	USA	1300				Salar del Hombre Muerto	LMCG Investments LLC	202.979				Wesfarmers Ltd.	BlackRock Inc.	615.06
	SailingStone Capital Partners LLC	USA	172.101				Central Huijin Asset Management Ltd.	China	1222.87				China	Liangbin Li	202.352				Wesfarmers Ltd.	Vanguard Group Inc.	611.442
	Brown Advisory Inc.	USA	156.238				Egerton Capital (UK) LLP	United Kingdom	1145.38				Mount Marion	Liangbin Li	202.299				Albemarle Corp.	Teachers Insurance and Annuity Association-College Retirement Equities Fund	610.585
	Norges Bank Investment Management	Norway	146.051				BNY Asset Management	USA	1115.7				United Kingdom	Legal & General Investment Management Ltd.	201.193				Arcadium Lithium plc	Hudson River Trading LLC	605.372
	Two Sigma Investments LP	USA	144.27				Dimensional Fund Advisors LP	USA	1042.67				Greenbushes	Legal & General Investment Management Ltd.	199.477				Albemarle Corp.	Empower Advisory Group LLC	589.3
	Qinghai State-owned Assets Investment and Management Co. Ltd.	China	139.765				Northern Trust Global Investments	United Kingdom	1020.56				Atacama(Albemarle)	Legal & General Investment Management Ltd.	198.998				Albemarle Corp.	Schweizerische Nationalbank	586.7
	Serengeti Asset Management LP	USA	139.547				Qinghai State-owned Assets Investment and Management Co. Ltd.	China	1007.41				Australia	L Capital Pty. Ltd.	195.021				SQM	Allspring Global Investments LLC	584.358
	Denver Investment Advisors LLC	USA	137.58				Janus Henderson Investors US LLC	USA	996.223				Salar de Olaroz	L Capital Pty. Ltd.	189.377				Toyota Tsusho Corp	Toyota Industries Corp.	582.639
	UBS Asset Management AG	Switzerland	137.463				Adage Capital Management LP	USA	894.899				Japan	Kowa Company Ltd.	189.122				Albemarle Corp.	Deutsche Asset & Wealth Management	582.178
	Mackenzie Financial Corp.	Canada	135.416				Geode Capital Management LLC	USA	860.091				Atacama(SQM)	Kowa Company Ltd.	187.957				Albemarle Corp.	Wells Fargo & Co.	578.171
	NLG Capital Inc.	USA	135.134				Putnam LLC	USA	826.824				USA	Joho Capital L.L.C.	187.563				Albemarle Corp.	Handelsbanken Asset Management	570.758
	Frank Russell Co.	USA	134.583				Barrow Hanley Mewhinney & Strauss LLC	USA	798.118				Salar del Hombre Muerto	Joho Capital L.L.C.	183.008				Pilbara Minerals Ltd.	Legal & General Investment Management Ltd.	550.566
	Federated Hermes, Inc.	USA	133.54				George Ring Ireland	USA	765.855				China	Jing Zhang	181.285				Arcadium Lithium plc	DNB Asset Management AS	550.42
	Riverbridge Partners LLC	USA	126.582				Sinochem Holdings Corporation Ltd.	China	764.622				Greenbushes	Jing Zhang	180.525				Zangge Mining Co.	Sichuan Yonghong Industrial Co., Ltd.	550.379
	Findlay Park Partners LLP	United Kingdom	126.084				Norges Bank Investment Management	Norway	744.61				China	Jianlang Xiong	179.303				SQM	Amundi Asset Management SAS	549.517
	STRS Ohio	USA	124.042				Bank of America Corp.	USA	695.969				Mount Marion	Jianlang Xiong	174.97				Arcadium Lithium plc	ETFS Management (AUS) Ltd.	543.332
	GE Asset Management Inc.	USA	122.443				Brazil Firms	Brazil	688				China	Jiangxi Tungsten Holding Group Co., LTD	172.043				SQM	EARNEST Partners LLC	540.395
	Brighthouse Investment Advisers LLC	USA	115.572				Columbus Circle Investors	USA	676.008				Yichun	Jiangxi Tungsten Holding Group Co., LTD	171.085				SQM	T. Rowe Price Group Inc.	531.671
	Westfield Capital Management Co. L.P.	USA	115.505				SPF Beheer BV	Netherlands	670.987				Australia	James Stuart Brown	170.09				IGO Ltd	Milford Asset Management LTD	525.435
	PineBridge Investments LLC	USA	114.651				Kowa Company Ltd.	Japan	628.266				Altura	James Stuart Brown	169.375				AMG Critical Materials N.V.	Heinz C. Schimmelbusch	511.072
	Aegon Asset Management UK Plc	United Kingdom	113.271				Macquarie Investment Management Business Trust	USA	601.949				Chile	Itaú Administradora General de Fondos SA	169.288				Arcadium Lithium plc	Charles Schwab Investment Management Inc.	510.077
	GAMCO Investors Inc.	USA	111.972				Westwood Management Corp.	USA	575.628				Atacama(SQM)	Itaú Administradora General de Fondos SA	168.04				Mineral Resources Ltd.	Colonial First State Investments Ltd.	509.782
	Principal Global Investors LLC	USA	110.365				New China Life Insurance Co. Ltd.	China	569.928				USA	Invesco Ltd.	167.644				Wesfarmers Ltd.	State Street Global Advisors Inc.	509.668
	Sinochem Holdings Corporation Ltd.	China	108.049				OppenheimerFunds Inc.	USA	566.144				Mibra	Invesco Ltd.	166.254				SQM	Geode Capital Management LLC	501.47
	Renaissance Technologies LLC	USA	104.865				AGF Management Ltd.	Australia	512.891				USA	Invesco Capital Management LLC	160.62				Arcadium Lithium plc	Barclays PLC	499.066
	Fairpointe Capital LLC	USA	102.67				OFI Advisors LLC	USA	484.298				Greenbushes	Invesco Capital Management LLC	155.235				Ganfeng Lithium Group	BlackRock Inc.	498.885
	ClearArc Capital Inc.	USA	100.478				Deutsche Asset & Wealth Management	USA	478.987				Salar del Hombre Muerto	Invesco Capital Management LLC	154.259				Sinomine Resource Grp Co Ltd	GF Securities Asset Management Co.Ltd.	491.164
	RCF Management LLC	Greenbushes	19705.4				First Eagle Investment Management LLC	USA	470.843				Atacama(Albemarle)	Invesco Capital Management LLC	153.724				Pilbara Minerals Ltd.	Dimensional Fund Advisors LP	490.25
	Tianqi Lithium Corp.	Greenbushes	10893.1				Anchor Bolt Capital LP	USA	460.889				Atacama(SQM)	Invesco Capital Management LLC	151.694				Tianqi Lithium Corp.	Pacific Asset Management Co. Ltd.	487.777
	Royal Bank of Canada	Greenbushes	7331.77				Bihua Zhang	China	438.458				Chile	Inversiones SQYA S.A	151.576				Tianqi Lithium Corp.	HSBC Jintrust Fund Management Co. Ltd.	484.188
	RBC Dominion Securities Inc.	Greenbushes	2862.83				DWS Investment Management Americas Inc.	USA	394.792				Atacama(SQM)	Inversiones SQYA S.A	151.555				Pilbara Minerals Ltd.	Northern Trust Global Investments	483.1
	Goldman Sachs Group Inc.	Greenbushes	2585.47				Luther King Capital Management Corp.	USA	389.622				China	ICBC Financial Asset Investment Co. Ltd.	150.088				Tianqi Lithium Corp.	LG Chem Ltd.	482.921
	CIBC Mellon Trust Co.	Greenbushes	2030.82				DJE Kapital AG	Germany	387.607				Chaerhan Lake	ICBC Financial Asset Investment Co. Ltd.	149.842				IGO Ltd	Dimensional Fund Advisors LP	481.692
	Merrill Lynch Pierce Fenner & Smith Inc.	Greenbushes	1974.75				Pzena Investment Management Inc.	USA	386.687				China	ICBC Credit Suisse Asset Management Co. Ltd.	146.284				IGO Ltd	Janus Henderson Group PLC	477.824
	AQR Arbitrage LLC	Greenbushes	1022.08				Yinhua Fund Management Co. Ltd.	China	382.967				Mount Marion	ICBC Credit Suisse Asset Management Co. Ltd.	139.965				AMG Critical Materials N.V.	Vanguard Group Inc.	477.524
	Longfellow Investment Management Co. LLC	Greenbushes	523.754				Security Investors LLC	USA	381.056				Australia	Huicen Capital Pty Ltd.	139.369				Zhejiang Huayou Cobalt Co. Ltd	Xue Hua Chen	477.5
	Global X Management Co. LLC	Greenbushes	372.615				Toyota Motor Corp.	Japan	374.488				Pilgangoora	Huicen Capital Pty Ltd.	139.23				Sayona Mining Ltd.	State Street Global Advisors Inc.	477.44
	Vertex One Asset Management Inc.	Greenbushes	333.298				Tide Point Capital Management LP	USA	361.72				China	Huatai-PineBridge Fund Management Co. Ltd.	137.999				AMG Critical Materials N.V.	Norges Bank Investment Management	473.822
	Water Island Capital LLC	Greenbushes	231.67				Abrdn Holdings Limited	United Kingdom	359.103				Mount Marion	Huatai-PineBridge Fund Management Co. Ltd.	137.129				Mineral Resources Ltd.	Jove Pty Ltd	470.615
	David Andrew Shaw	Greenbushes	189.127				LSV Asset Management	USA	354.953				China	HuaAn Fund Management Company Ltd.	136.717				Mineral Resources Ltd.	Mccusker Holdings Pty. Ltd.	466.824
	Syquant Capital SAS	Greenbushes	179.457				Shenzhen Qianyuan Investment Co., Ltd.	China	353.324				Greenbushes	HuaAn Fund Management Company Ltd.	136.546				Qinghai Salt Lake Industry Co.	China Cinda Asset Management Co. Ltd.	466.01
	PineBridge Investments LLC	Greenbushes	114.651				Point7 Asset Management LP	USA	342.748				China	HSBC Jintrust Fund Management Co. Ltd.	136.157				Ganfeng Lithium Group	E Fund Management Co. Ltd.	461.218
	Aegon Asset Management UK Plc	Greenbushes	113.271				UBS Asset Management AG	Switzerland	341.683				Greenbushes	HSBC Jintrust Fund Management Co. Ltd.	135.285				Arcadium Lithium plc	Susquehanna International Group LLP	460.429
	Jennison Associates LLC	Greenbushes	107.773				Fairpointe Capital LLC	USA	329.139				Mount Marion	HSBC Jintrust Fund Management Co. Ltd.	130.23				Albemarle Corp.	Wellington Management Group LLP	451.274
	Nutrien Ltd.	Atacama(SQM)	13117.9				Foord Asset Management Guernsey Ltd	United Kingdom	319.642				Netherlands	Heinz C. Schimmelbusch	128.055				Albemarle Corp.	Royal Bank of Canada	450.043
	Inversiones SQYA S.A	Atacama(SQM)	9712.9				MultiConcept Fund Management S.A.	Luxembourg	319.642				Mibra	Heinz C. Schimmelbusch	127.229				Albemarle Corp.	Nikko Asset Management Co. Ltd.	448.569
	Nitratos de Chile SA	Atacama(SQM)	2790.95				Edge Asset Management Inc.	USA	316.382				China	Harvest Fund Management Co. Ltd.	126.999				SQM	Itau USA Asset Management Inc.	447.949
	Global Mining Investments (Chile ) S.A.	Atacama(SQM)	1370.39				Legal & General Investment Management Ltd.	United Kingdom	312.813				Greenbushes	Harvest Fund Management Co. Ltd.	126.862				Arcadium Lithium plc	Bank of America Corp.	439.252
	BlackRock Inc.	Atacama(SQM)	973.549				T. Rowe Price Group Inc.	USA	307.97				Sweden	Handelsbanken Asset Management	126.393				Albemarle Corp.	Van Eck Associates Corp.	435.433
	T. Rowe Price Group Inc.	Atacama(SQM)	666.481				Charles Schwab Investment Management Inc.	USA	307.64				Salar de Olaroz	Handelsbanken Asset Management	125.82				Albemarle Corp.	Barclays PLC	434.413
	Kowa Company Ltd.	Atacama(SQM)	575.346				Paradice Investment Management Pty Ltd.	Australia	298.053				Greenbushes	Handelsbanken Asset Management	123.727				Albemarle Corp.	Jane Street Group LLC	428.443
	Morgan Stanley Investment Management Inc.	Atacama(SQM)	488.534				Stelliam Investment Management LP	USA	297.953				Atacama(Albemarle)	Handelsbanken Asset Management	123.498				Arcadium Lithium plc	Leeward Investments LLC	427.024
	Vanguard Group Inc.	Atacama(SQM)	364.704				China Asset Management Co. Ltd.	China	295.502				Salar del Hombre Muerto	Handelsbanken Asset Management	122.934				Mineral Resources Ltd.	D&C Geraghty Pty. Ltd.	420.421
	Baillie Gifford & Co.	Atacama(SQM)	354.461				Lichun Chen	China	288.078				Mount Marion	Handelsbanken Asset Management	122.031				Chengxin Lithium Group	Shenzhen Chengtun Industrial Development Co. Ltd.	420.046
	Neuberger Berman BD LLC prior to change in line of business	Atacama(SQM)	332.457				Tibet Mining Asset Operation Co. Ltd.	China	287.47				China	Haitong M&A (Shanghai) Private Fund Management Co. Ltd.	119.969				Arcadium Lithium plc	Merrill Lynch Pierce Fenner & Smith Inc.	418.741
	Van Eck Associates Corp.	Atacama(SQM)	276.567				Principal Global Investors LLC	USA	286.102				Bikita	Haitong M&A (Shanghai) Private Fund Management Co. Ltd.	118.423				Core Lithium Ltd	JPMorgan Chase & Co.	418.659
	Administradora de Fondos de Pensiones Cuprum SA	Atacama(SQM)	245.717				Royce & Associates LP	USA	277.933				China	Haihua Zhong	118.095				Pilbara Minerals Ltd.	Amundi Asset Management SAS	417.493
	Scout Investments Inc.	Atacama(SQM)	218.099				Sculptor Capital Management Inc.	USA	273.178				Bikita	Haihua Zhong	117.172				Arcadium Lithium plc	Polar Capital Holdings PLC	416.802
	ClariVest Asset Management LLC	Atacama(SQM)	205.825				Invesco Great Wall Fund Management Co. Ltd	China	271.817				China	Haibo Shen	117.098				Core Lithium Ltd	State Street Global Advisors Inc.	408.561
	William Blair Investment Management LLC	Atacama(SQM)	194.657				River Road Asset Management LLC	USA	270.116				Mount Marion	Haibo Shen	116.262				Albemarle Corp.	ZKB Asset Management	408.34
	Frank Russell Co.	Atacama(SQM)	134.583				Administradora de Fondos de Pensiones Cuprum SA	Chile	263.74				China	Guotai Asset Mgmt Co. Ltd.	116.055				Albemarle Corp.	Citigroup Inc.	406.604
	Federated Hermes, Inc.	Atacama(SQM)	133.54				Thunderbird Partners LLP	United Kingdom	262.17				Mount Marion	Guotai Asset Mgmt Co. Ltd.	115.717				IGO Ltd	Van Eck Associates Corp.	405.873
	State Street Global Advisors Inc.	Atacama(SQM)	132.078				Axiom Investors LLC	USA	255.65				Greenbushes	Guotai Asset Mgmt Co. Ltd.	115.468				IGO Ltd	Nt-Comnwlth Super Corp	405.589
	GE Asset Management Inc.	Atacama(SQM)	122.443				Eaton Vance Management	USA	253.709				USA	Grantham Mayo Van Otterloo & Co LLC	113.361				Wesfarmers Ltd.	Australian Super Pty Ltd	396.909
	Principal Global Investors LLC	Atacama(SQM)	110.365				Australia Firms	Australia	250.144				Atacama(SQM)	Grantham Mayo Van Otterloo & Co LLC	112.702				Zangge Mining Co.	Zuoping Zheng	393.211
	Columbia Wanger Asset Management LLC	Atacama(SQM)	109.961				Sasco Capital Inc.	USA	249.068				USA	Granite Investment Partners LLC	112.416				IGO Ltd	Colonial First State Investments Ltd.	389.388
	T. Rowe Price Group Inc.	Atacama(Rockwood)	3776.59				American Century Investment Management Inc	USA	232.587				Salar del Hombre Muerto	Granite Investment Partners LLC	111.61				Pilbara Minerals Ltd.	BNY Asset Management	388.431
	Morgan Stanley Investment Management Inc.	Atacama(Rockwood)	1848.47				China Cinda Asset Management Co. Ltd.	China	232.169				USA	Goldman Sachs Asset Management LP	111.065				SQM	Van Eck Associates Corp.	385.731
	Atlantic Investment Management Inc.	Atacama(Rockwood)	1815.28				Goldman Sachs Group Inc.	USA	231.164				Mount Marion	Goldman Sachs Asset Management LP	110.979				Tianqi Lithium Corp.	Global X Management Co. LLC	384.325
	Iridian Asset Management LLC	Atacama(Rockwood)	1365.27				Janus Henderson Group PLC	United Kingdom	226.858				United Kingdom	GO ETF Solutions LLP	106.889				Albemarle Corp.	Susquehanna International Group LLP	379.34
	Vanguard Group Inc.	Atacama(Rockwood)	1269.45				Russell Investment Management LLC	USA	224.366				Mt Cattlin	GO ETF Solutions LLP	105.519				Sigma Lithium Corp.	Nucleo Capital Ltda.	374.172
	Barrow Hanley Mewhinney & Strauss LLC	Atacama(Rockwood)	1181.72				Zhongrong International Trust Co. Ltd.	China	213.327				Pilgangoora	GO ETF Solutions LLP	105.16				Mineral Resources Ltd.	CPU Share Plans Pty Ltd.	370.653
	BlackRock Inc.	Atacama(Rockwood)	1120.66				Fullgoal Fund Management Co. Ltd.	China	211.556				Mibra	GO ETF Solutions LLP	104.931				IGO Ltd	Geode Capital Management LLC	366.255
	Jana Partners Management LP	Atacama(Rockwood)	1032.54				Global X Management Co. LLC	USA	194.528				Salar del Hombre Muerto	GO ETF Solutions LLP	104.838				Albemarle Corp.	Schroder Investment Management Ltd.	365.172
	Cadian Capital Management LP	Atacama(Rockwood)	877.295				Toyota Industries Corp.	Japan	193.035				Mount Marion	GO ETF Solutions LLP	104.731				Tianqi Lithium Corp.	Orient Fund Management Co. Ltd.	362.583
	Axon Capital LP	Atacama(Rockwood)	813.829				James Derrick Calaway	Australia	192.985				USA	Global X Management Co. LLC	104.632				Ganfeng Lithium Group	Baillie Gifford & Co.	361.291
	Allianz Asset Management GmbH	Atacama(Rockwood)	702.934				Baron Capital Group Inc.	USA	176.643				Greenbushes	Global X Management Co. LLC	102.63				Arcadium Lithium plc	CIBC Pvt. Wealth Advisors Inc.	359.838
	Fred Alger Management LLC	Atacama(Rockwood)	701.116				Frontier Capital Management Co LLC	USA	172.266				Atacama(Albemarle)	Global X Management Co. LLC	102.217				Albemarle Corp.	Invesco Ltd.	359.364
	First Eagle Investment Management LLC	Atacama(Rockwood)	631.225				RBC Global Asset Management Inc.	Canada	169.199				Mount Marion	Global X Management Co. LLC	102.181				Arcadium Lithium plc	Lazard Asset Management LLC	359.258
	FMR LLC	Atacama(Rockwood)	597.371				Allspring Global Investments LLC	USA	168.729				Atacama(SQM)	Global X Management Co. LLC	101.361				AMG Critical Materials N.V.	BlackRock Inc.	355.711
	Sculptor Capital Management Inc.	Atacama(Rockwood)	488.289				National Council for Social Security Fund	China	166.306				Salar del Hombre Muerto	Global X Management Co. LLC	100.943				Mineral Resources Ltd.	Nt-Comnwlth Super Corp	355.232
	Gates Capital Management Inc.	Atacama(Rockwood)	458.304				Creat Resources Holdings Ltd.	Australia	164				Pilgangoora	Global X Management Co. LLC	100.523				Arcadium Lithium plc	Citigroup Inc.	354.196
	D.E. Shaw & Co. LP	Atacama(Rockwood)	449.396				Invesco Ltd.	USA	158.645				Mt Cattlin	Global X Management Co. LLC	100.396				Mineral Resources Ltd.	Netwealth Investments Ltd.	347.967
	Southpoint Capital Advisors LP	Atacama(Rockwood)	387.914				Abu Dhabi Investment Authority	China	158.426				Silver Peak	Global X Management Co. LLC	99.794				Sayona Mining Ltd.	Vanguard Group Inc.	347.161
	ClearBridge Investments LLC	Atacama(Rockwood)	335.813				Goldman Sachs Asset Management LP	USA	152.657				Salar de Olaroz	Global X Management Co. LLC	99.7477				IGO Ltd	Amundi Asset Management SAS	346.77
	Invesco Ltd.	Atacama(Rockwood)	321.197				New York State Common Retirement Fund	USA	152.164				China	GF Fund Management Co. Ltd.	23513				Mineral Resources Ltd.	Geode Capital Management LLC	340.32
	State Street Global Advisors Inc.	Atacama(Rockwood)	305.427				Baring Asset Management Ltd.	United Kingdom	144.522				Mount Marion	GF Fund Management Co. Ltd.	18670.9				Albemarle Corp.	AFP Provida SA	339.618
	Allianz Global Investors U.S. LLC	Atacama(Rockwood)	298.902				Nikko Asset Management Co. Ltd.	Japan	143.606				USA	Geode Capital Management LLC	17459.9				SQM	LarrainVial Asset Management Administradora General de Fondos SA	339.585
	American Century Investment Management Inc	Atacama(Rockwood)	271.353				Schweizerische Nationalbank	Switzerland	133.022				Greenbushes	Geode Capital Management LLC	16268.1				Arcadium Lithium plc	Foord Asset Management Guernsey Ltd	337.864
	Adage Capital Management LP	Atacama(Rockwood)	267.816				New Jersey Division of Investment	USA	129.723				Atacama(Albemarle)	Geode Capital Management LLC	13490.2				Core Lithium Ltd	Vanguard Group Inc.	333.675
	William Blair Investment Management LLC	Atacama(Rockwood)	264.936				Franco Mignacco	Canada	127.634				Salar del Hombre Muerto	Geode Capital Management LLC	13263.3				SQM	Eastspring Investments (Singapore) Ltd.	332.897
	Seifollah Ghasemi	Atacama(Rockwood)	261.706				Massachusetts Financial Services Company	USA	126.377				Silver Peak	Geode Capital Management LLC	9787				Albemarle Corp.	Mitsubishi UFJ Trust and Banking Corp.	331.495
	Massachusetts Financial Services Company	Atacama(Rockwood)	258.182				Renaissance Technologies LLC	USA	126.369				USA	GE Asset Management Inc.	6541.92				Albemarle Corp.	London Co. of Virginia LLC	329.624
	Corvex Management LP	Atacama(Rockwood)	204.669				Legg Mason, Inc.	USA	125.441				Greenbushes	GE Asset Management Inc.	5869.68				SQM	Banchile Administradora General de Fondos SA	327.761
	Standard Investments LLC	Atacama(Rockwood)	192.017				Deutsche Bank AG	United Kingdom	123.249				China	Ganfeng Lithium Group Co. Ltd.	5649.05				Tianqi Lithium Corp.	China Southern Asset Management Co. Ltd.	326.96
	Amundi Asset Management SAS	Atacama(Rockwood)	187.143				Hardman Johnston Global Advisors LLC	USA	122.388				Pilgangoora	Ganfeng Lithium Group Co. Ltd.	5154.85				Zhejiang Huayou Cobalt Co. Ltd	Hangzhou Youyou Business Management Partnership Enterprise (L.P.)	324.817
	RS Investment Management Co. LLC	Atacama(Rockwood)	175.457				Hahn Capital Management LLC	USA	121.747				China	Fullgoal Fund Management Co. Ltd.	3954.1				Arcadium Lithium plc	ClearBridge Investments LLC	323.051
	Brown Advisory Inc.	Atacama(Rockwood)	156.238				Scout Investments Inc.	USA	117.33				Mount Marion	Fullgoal Fund Management Co. Ltd.	3654.77				Mineral Resources Ltd.	Dimensional Fund Advisors LP	322.113
	Norges Bank Investment Management	Atacama(Rockwood)	146.051				Liangbin Li	China	116.763				USA	Frontier Capital Management Co LLC	3639.28				Tianqi Lithium Corp.	Zijin Mining Group Co. Ltd.	321.945
	Two Sigma Investments LP	Atacama(Rockwood)	144.27				STRS Ohio	USA	111.787				Salar del Hombre Muerto	Frontier Capital Management Co LLC	3341.12				Lithium Americas (Argentina) C	Fifthdelta Ltd.	321.115
	Serengeti Asset Management LP	Atacama(Rockwood)	139.547				Richard Phillip Seville	Australia	110.376				USA	Franklin Resources Inc.	3265.07				Tianqi Lithium Corp.	BlackRock Inc.	320.296
	Denver Investment Advisors LLC	Atacama(Rockwood)	137.58				Changsheng Fund Management Co. Ltd.	China	109.555				Greenbushes	Franklin Resources Inc.	3163.01				IGO Ltd	JP Morgan Asset Management	319.017
	UBS Asset Management AG	Atacama(Rockwood)	137.463				China Great Wall Asset Management Co. Ltd.	China	109.292				Atacama(Albemarle)	Franklin Resources Inc.	3105.37				Albemarle Corp.	SPF Beheer BV	316.721
	Mackenzie Financial Corp.	Atacama(Rockwood)	135.416				DWS Investment GmbH	Germany	108.017				Silver Peak	Franklin Resources Inc.	2976				Arcadium Lithium plc	CI Global Asset Management	312.181
	NLG Capital Inc.	Atacama(Rockwood)	135.134				GE Asset Management Inc.	USA	106.991				Salar del Hombre Muerto	Franklin Resources Inc.	2734.28				Sigma Lithium Corp.	Rosewill Bay Ltd.	312.144
	BNY Asset Management	Atacama(Rockwood)	133.952				John Anthony Kanellitsas	Canada	106.164				United Kingdom	Foord Asset Management Guernsey Ltd	2359.69				Mineral Resources Ltd.	McCusker Charitable Foundation	310.526
	Teachers Insurance and Annuity Association-College Retirement Equities Fund	Atacama(Rockwood)	128.899				Anthony Peter Tse	Australia	105.428				Salar del Hombre Muerto	Foord Asset Management Guernsey Ltd	2340.62				Tianqi Lithium Corp.	Morgan Stanley	310.452
	Riverbridge Partners LLC	Atacama(Rockwood)	126.582				California Public Employees' Retirement System	USA	103.362				USA	FMR LLC	2303.73				Sinomine Resource Grp Co Ltd	Shanghai Guotai Junan Securities Asset Management Co. Ltd.	306.219
	Northern Trust Global Investments	Atacama(Rockwood)	118.148				Davenport & Co. LLC	USA	102.857				Salar del Hombre Muerto	FMR LLC	2256.2				SQM	Northern Trust Global Investments	306.147
	Brighthouse Investment Advisers LLC	Atacama(Rockwood)	115.572				California State Teachers' Retirement System	USA	102.597				Atacama(SQM)	FMR LLC	2233.51				Arcadium Lithium plc	Baillie Gifford & Co.	306.133
	GAMCO Investors Inc.	Atacama(Rockwood)	111.972				China Southern Asset Management Co. Ltd.	China	102.367				Greenbushes	FMR LLC	2210				Sinomine Resource Grp Co Ltd	Orient Fund Management Co. Ltd.	305.567
	Renaissance Technologies LLC	Atacama(Rockwood)	104.865				Lord Abbett & Co. LLC	USA	101.812				Atacama(Albemarle)	FMR LLC	2159.36				SQM	UBS Asset Management AG	305.368
	ClearArc Capital Inc.	Atacama(Rockwood)	100.478				ZKB Asset Management	Switzerland	101.709				Silver Peak	FMR LLC	2155.09				Ganfeng Lithium Group	GIC Pte. Ltd.	302.686
	PPM America Inc.	Mt Cattlin	674.241				Cove Street Capital LLC	USA	101.587				USA	First Trust Advisors LP	1931.04				Piedmont Lithium Inc	State Street Global Advisors Inc.	302.062
	Creat Resources Holdings Ltd.	Mt Cattlin	244.775				Charles Bernard Francis Whitfield	Australia	101.572				Greenbushes	First Trust Advisors LP	1884.69				Sinomine Resource Grp Co Ltd	UBS SDIC Fund Management Co. Ltd.	298.841
	Vanguard Group Inc.	Mt Cattlin	154.437				Morgan Stanley	USA	100.941				Atacama(Albemarle)	First Trust Advisors LP	1871.38				SQM	Citadel Advisors LLC	292.707
	Qinghai State-owned Assets Investment and Management Co. Ltd.	Chaerhan Lake	139.765				Lincoln Financial Investments Corp.	USA	100.649				Salar del Hombre Muerto	First Trust Advisors LP	1808.3				SQM	Dimensional Fund Advisors LP	292.285
	Sinochem Holdings Corporation Ltd.	Chaerhan Lake	108.049				USA Firms	USA	100				Bermuda	Fidelity International Ltd.	1802.19				Qinghai Salt Lake Industry Co.	Wuhu Xinzeqing Investment Management Partnership (Limited Partnership)	291.515
	Capital Research & Mgmt Co.	Salar del Hombre Muerto	1615.21				Chengdu Tianqi Industry Group Co. Ltd.	Greenbushes	17947.1				Mount Marion	Fidelity International Ltd.	1704.4				Allkem Ltd	Norges Bank Investment Management	289.93
	BlackRock Inc.	Salar del Hombre Muerto	1176.11				Nutrien Ltd.	Salar de Atacama(SQM)	14080.1				Australia	Farjoy Pty Ltd.	1614.89				Sigma Lithium Corp.	Frontier Capital Management Co LLC	281.956
	FMR LLC	Salar del Hombre Muerto	972.314				Inversiones SQYA S.A	Salar de Atacama(SQM)	13186.8				Altura	Farjoy Pty Ltd.	1605.89				Arcadium Lithium plc	First Trust Advisors LP	281.357
	Vanguard Group Inc.	Salar del Hombre Muerto	862.061				Jiangxi Tungsten Holding Group Co., LTD	Yichun	9787				China	Everbright Pramerica Fund Management Co.	1519.37				IGO Ltd	Perth Select Seafoods Pty Ltd	280.44
	State Street Global Advisors Inc.	Salar del Hombre Muerto	588.694				China Firms	East Taijinair	8421				Greenbushes	Everbright Pramerica Fund Management Co.	1500.13				Tianqi Lithium Corp.	UBS SDIC Fund Management Co. Ltd.	277.674
	JP Morgan Asset Management	Salar del Hombre Muerto	542.711				Vanguard Group Inc.	Greenbushes	4950.06				USA	Ensign Peak Advisors Inc.	1473.28				Toyota Tsusho Corp	Nomura Asset Management Co. Ltd.	277.421
	Cramer Rosenthal McGlynn LLC	Salar del Hombre Muerto	368.523				China Firms	Bikita	3842.82				Salar del Hombre Muerto	Ensign Peak Advisors Inc.	1420.37				Sigma Lithium Corp.	Electron Capital Partners LLC	276.023
	RS Investment Management Co. LLC	Salar del Hombre Muerto	329.593				Franklin Resources Inc.	Greenbushes	3536.56				Greenbushes	Ensign Peak Advisors Inc.	1393.87				IGO Ltd	Argo Investments Ltd.	275.6
	Janus Henderson Investors US LLC	Salar del Hombre Muerto	273.959				BlackRock Inc.	Greenbushes	3494.59				Atacama(Albemarle)	Ensign Peak Advisors Inc.	1356.37				Allkem Ltd	Vanguard Group Inc.	273.621
	LSV Asset Management	Salar del Hombre Muerto	269.07				SailingStone Capital Partners LLC	Salar de Atacama(SQM)	2912.77				Australia	Endeavor Asset Management Pty. Ltd.	1202.3				SQM	Electron Capital Partners LLC	270.971
	Luther King Capital Management Corp.	Salar del Hombre Muerto	224.009				Vanguard Group Inc.	Salar de Atacama(Albemarle)	2791.43				Mt Cattlin	Endeavor Asset Management Pty. Ltd.	1125.25				Arcadium Lithium plc	Schweizerische Nationalbank	268.416
	Sasco Capital Inc.	Salar del Hombre Muerto	213.255				State Street Global Advisors Inc.	Greenbushes	2708.41				USA	Eaton Vance Management	1118.17				Tianqi Lithium Corp.	Vanguard Group Inc.	267.672
	American Century Investment Management Inc	Salar del Hombre Muerto	199.189				Wei Ping Jiang	Greenbushes	2584.84				Greenbushes	Eaton Vance Management	1117.83				Sinomine Resource Grp Co Ltd	Pingwei Wang	266.896
	Jennison Associates LLC	Salar del Hombre Muerto	195.759				Nutrien Ltd.	Cauchari-Olaroz	2196.01				Atacama(Albemarle)	Eaton Vance Management	1075.65				Core Lithium Ltd	Sichuan Yahua Industrial Group Co. Ltd.	266.686
	Frontier Capital Management Co LLC	Salar del Hombre Muerto	189.872				Jennison Associates LLC	Greenbushes	2146.3				USA	EARNEST Partners LLC	1062.94				Pilbara Minerals Ltd.	Teachers Insurance and Annuity Association-College Retirement Equities Fund	262.153
	Northern Trust Global Investments	Salar del Hombre Muerto	183.454				Inversiones SQYA S.A	Cauchari-Olaroz	2056.69				Atacama(SQM)	EARNEST Partners LLC	1032.09				Ganfeng Lithium Group	Vanguard Group Inc.	261.022
	Iridian Asset Management LLC	Salar del Hombre Muerto	177.144				China Universal Asset Management Co. Ltd.	Greenbushes	2029.94				Greenbushes	EARNEST Partners LLC	1018.16				Tianqi Lithium Corp.	Huatai-PineBridge Fund Management Co. Ltd.	257.756
	Wellington Management Group LLP	Salar del Hombre Muerto	173.575				Franklin Resources Inc.	Salar de Atacama(Albemarle)	1994.33				Atacama(Albemarle)	EARNEST Partners LLC	1009.6				SQM	Zurich Asset Management Administradora General De Fondos SA	255.659
	SailingStone Capital Partners LLC	Salar del Hombre Muerto	172.101				Zhongxin Guoan	West Taijinair	1980				USA	Eagle Asset Management Inc.	999.47				SQM	Nordea Investment Management AB	253.994
	Teachers Insurance and Annuity Association-College Retirement Equities Fund	Salar del Hombre Muerto	159.138				BlackRock Inc.	Salar de Atacama(Albemarle)	1970.66				Greenbushes	Eagle Asset Management Inc.	978.092				Mineral Resources Ltd.	Legal & General Investment Management Ltd.	252.823
	Columbia Wanger Asset Management LLC	Salar del Hombre Muerto	151.826				Capital Research & Mgmt Co.	Greenbushes	1773.91				Atacama(Albemarle)	Eagle Asset Management Inc.	957.695				Arcadium Lithium plc	Voya Investment Management LLC	250.692
	BNY Asset Management	Salar del Hombre Muerto	137.309				Vanguard Group Inc.	Salar del Hombre Muerto	1757.83				China	E Fund Management Co. Ltd.	953.85				Sigma Lithium Corp.	Calvyn Gardner	249.716
	Findlay Park Partners LLP	Salar del Hombre Muerto	126.084				Portugal Firms	Alvarroes	1595				Greenbushes	E Fund Management Co. Ltd.	930.393				SQM	BCI Administradora de Fondos Mutuos SA	247.639
	STRS Ohio	Salar del Hombre Muerto	124.042				State Street Global Advisors Inc.	Salar de Atacama(Albemarle)	1527.33				Mount Marion	E Fund Management Co. Ltd.	870.6				Sinomine Resource Grp Co Ltd	Fullgoal Fund Management Co. Ltd.	247.58
	Westfield Capital Management Co. L.P.	Salar del Hombre Muerto	115.505				Glenview Capital Management LLC	Salar del Hombre Muerto	1300				Norway	DNB Asset Management AS	861.675				Mineral Resources Ltd.	Jupiter Fund Management PLC	247.471
	Fairpointe Capital LLC	Salar del Hombre Muerto	102.67				Argentina Firms	Cauchari-Olaroz	1275				Mibra	DNB Asset Management AS	856.535				Arcadium Lithium plc	RobecoSAM AG	246.8
	Zimbabwe Firms	Bikita	5505				Central Huijin Asset Management Ltd.	Greenbushes	1222.87				Germany	DJE Kapital AG	836.819				Sinomine Resource Grp Co Ltd	China Merchants Securities Asset Management Co. Ltd.	243.869
	China Firms	East Taijinair	2970				Jennison Associates LLC	Salar de Atacama(Albemarle)	1210.34				Greenbushes	DJE Kapital AG	834.794				Piedmont Lithium Inc	BlackRock Inc.	242.524
	T. Rowe Price Group Inc.	Silver Peak	512.582				Teachers Insurance and Annuity Association-College Retirement Equities Fund	Greenbushes	1186.06				Atacama(Albemarle)	DJE Kapital AG	825.467				Mineral Resources Ltd.	Van Eck Associates Corp.	241.103
	Morgan Stanley Investment Management Inc.	Silver Peak	250.885				BlackRock Inc.	Salar del Hombre Muerto	1169.97				USA	Dimensional Fund Advisors LP	812.47				Tianqi Lithium Corp.	China Universal Asset Management Co. Ltd.	240.721
	Atlantic Investment Management Inc.	Silver Peak	246.381				Capital Research & Mgmt Co.	Salar del Hombre Muerto	1022.13				Greenbushes	Dimensional Fund Advisors LP	806.71				Arcadium Lithium plc	Eaton Vance Management	238.761
	Iridian Asset Management LLC	Silver Peak	185.303				Qinghai State-owned Assets Investment and Management Co. Ltd.	Chaerhan Lake	1007.41				Atacama(Albemarle)	Dimensional Fund Advisors LP	790.643				SQM	Itaú Unibanco Holding SA	238.107
	Vanguard Group Inc.	Silver Peak	172.297				Capital Research & Mgmt Co.	Salar de Atacama(Albemarle)	1000.34				Mount Marion	Dimensional Fund Advisors LP	752.142				Pilbara Minerals Ltd.	Janus Henderson Group PLC	236.602
	Barrow Hanley Mewhinney & Strauss LLC	Silver Peak	160.39				FMR LLC	Greenbushes	934.272				Salar del Hombre Muerto	Dimensional Fund Advisors LP	707.479				Tianqi Lithium Corp.	Fullgoal Fund Management Co. Ltd.	232.885
	BlackRock Inc.	Silver Peak	152.102				Iridian Asset Management LLC	Greenbushes	891.183				Silver Peak	Dimensional Fund Advisors LP	704.031				Arcadium Lithium plc	BetaShares Capital Ltd.	231.798
	Jana Partners Management LP	Silver Peak	140.142				State Street Global Advisors Inc.	Salar del Hombre Muerto	856.962				Atacama(SQM)	Dimensional Fund Advisors LP	702.984				Sayona Mining Ltd.	Acuity Capital Investment Management Pty Ltd	230.895
	Cadian Capital Management LP	Silver Peak	119.072				Columbia Management Investment Advisers LLC	Greenbushes	844.714				Mt Cattlin	Dimensional Fund Advisors LP	702.862				SQM	Bank of America Corp.	230.707
	Axon Capital LP	Silver Peak	110.458				Barrow Hanley Mewhinney & Strauss LLC	Salar del Hombre Muerto	798.118				Australia	D&C Geraghty Pty. Ltd.	692.699				SQM	SEI Investments Co.	229.753
	Jiangxi Tungsten Holding Group Co., LTD	Yichun	9787				George Ring Ireland	Cauchari-Olaroz	765.855				Mount Marion	D&C Geraghty Pty. Ltd.	691.244				Tianqi Lithium Corp.	China Asset Management Co. Ltd.	229.428
	China Firms	Jiajika	4856				Sinochem Holdings Corporation Ltd.	Chaerhan Lake	764.622				Australia	Creat Resources Holdings Ltd.	622.776				SQM	Millennium Management LLC	221.644
	Tibet Mining Asset Operation Co. Ltd.	Zhabuye	458.525				Egerton Capital (UK) LLP	Greenbushes	732.38				Mt Cattlin	Creat Resources Holdings Ltd.	618				Lithium Americas (Argentina) C	Vanguard Group Inc.	220.334
	Zhongxin Guoan	West Taijinair	1980				FMR LLC	Salar del Hombre Muerto	698.395				China	Contemporary Amperex Technology Co. Ltd.	614.483				Sinomine Resource Grp Co Ltd	China Southern Asset Management Co. Ltd.	219.741
	Brazil Firms	Cachoeira	606				Brazil Firms	Cachoeira	688				Pilgangoora	Contemporary Amperex Technology Co. Ltd.	611.516				SQM	Empowered Funds LLC	219.136
	Portugal Firms	Alvarroes	1280				Teachers Insurance and Annuity Association-College Retirement Equities Fund	Salar de Atacama(Albemarle)	668.841				Switzerland	Commodity Capital AG	606.859				AMG Critical Materials N.V.	Legal & General Investment Management Ltd.	218.783
							FMR LLC	Salar de Atacama(SQM)	651.277				Mt Cattlin	Commodity Capital AG	604.976				Core Lithium Ltd	Leendert Hoeksema	210.094
							Kowa Company Ltd.	Salar de Atacama(SQM)	628.266				USA	Columbia Management Investment Advisers LLC	572.615				SQM	Santander Asset Management SA SGIIC	209.103
							BNY Asset Management	Greenbushes	617.418				Salar del Hombre Muerto	Columbia Management Investment Advisers LLC	549.887				Sinomine Resource Grp Co Ltd	Haihua Zhong	208.895
							Dimensional Fund Advisors LP	Greenbushes	590.988				Greenbushes	Columbia Management Investment Advisers LLC	531.913				Sinomine Resource Grp Co Ltd	First State Cinda Fund Management Co. Ltd.	207.889
							Argentina Firms	Salar de Olaroz	586.755				Atacama(Albemarle)	Columbia Management Investment Advisers LLC	524.633				AMG Critical Materials N.V.	Goldman Sachs Group Inc.	205.337
							Janus Henderson Investors US LLC	Greenbushes	572.845				USA	ClearBridge Investments LLC	518.444				SQM	AllianceBernstein LP	204.403
							New China Life Insurance Co. Ltd.	Greenbushes	569.928				Atacama(SQM)	ClearBridge Investments LLC	517.227				Arcadium Lithium plc	Nordea Investment Management AB	203.852
							Putnam LLC	Greenbushes	528.687				USA	Citigroup Inc.	516.308				Lithium Americas (Argentina) C	George Ring Ireland	202.722
							Northern Trust Global Investments	Greenbushes	527.492				Salar del Hombre Muerto	Citigroup Inc.	508.818				Zangge Mining Co.	Beijing Lianzhong Peer Biotechnology Co. Ltd.	202.106
							FMR LLC	Salar de Atacama(Albemarle)	526.854				USA	Citadel Advisors LLC	487.436				SQM	Todd Asset Management LLC	201.837
							BlackRock Inc.	Salar de Atacama(SQM)	511.09				Atacama(SQM)	Citadel Advisors LLC	476.575				Ganfeng Lithium Group	Shenzhen Jinhui Rongsheng Wealth Management Co. Ltd.	200.508
							Vanguard Group Inc.	Salar de Atacama(SQM)	508.798				USA	CIBC Pvt. Wealth Advisors Inc.	463.791				Albemarle Corp.	Rhumbline Advisers Ltd Partnership	200.287
							Jennison Associates LLC	Salar del Hombre Muerto	508.598				Salar del Hombre Muerto	CIBC Pvt. Wealth Advisors Inc.	462.427				Ganfeng Lithium Group	HSBC Jintrust Fund Management Co. Ltd.	200.087
							Iridian Asset Management LLC	Salar de Atacama(Albemarle)	502.555				Australia	Christopher James Ellison	448.044				AMG Critical Materials N.V.	Dimensional Fund Advisors LP	199.568
							Columbia Management Investment Advisers LLC	Salar de Atacama(Albemarle)	476.351				Mount Marion	Christopher James Ellison	440.386				Ganfeng Lithium Group	Haibo Shen	198.509
							Columbia Management Investment Advisers LLC	Salar del Hombre Muerto	464.384				China	China Universal Asset Management Co. Ltd.	435.956				AMG Critical Materials N.V.	Van Eck Associates Corp.	198.164
							SailingStone Capital Partners LLC	Cauchari-Olaroz	454.294				Mount Marion	China Universal Asset Management Co. Ltd.	431.281				Pilbara Minerals Ltd.	Charles Schwab Investment Management Inc.	197.617
							Geode Capital Management LLC	Greenbushes	448.527				Greenbushes	China Universal Asset Management Co. Ltd.	428.497				Tianqi Lithium Corp.	Greenwoods Asset Management Ltd.	197.1
							Bank of America Corp.	Greenbushes	445.016				China	China Southern Asset Management Co. Ltd.	426.371				Zhejiang Huayou Cobalt Co. Ltd	China Asset Management Co. Ltd.	195.904
							Bihua Zhang	Greenbushes	438.458				Mount Marion	China Southern Asset Management Co. Ltd.	421.652				Albemarle Corp.	Luther King Capital Management Corp.	195.195
							Columbus Circle Investors	Greenbushes	432.252				China	China Securities Finance Corporation Ltd.	416.617				Albemarle Corp.	HB Wealth Management LLC	194.766
							SPF Beheer BV	Greenbushes	429.042				Greenbushes	China Securities Finance Corporation Ltd.	404.637				AMG Critical Materials N.V.	UBS Asset Management AG	194.536
							Egerton Capital (UK) LLP	Salar de Atacama(Albemarle)	413.003				China	China Nonferrous Metal Mining (Group) Co. Ltd.	397.434				Sinomine Resource Grp Co Ltd	Huatai-PineBridge Fund Management Co. Ltd.	194.035
							Vanguard Group Inc.	Silver Peak	395.677				Bikita	China Nonferrous Metal Mining (Group) Co. Ltd.	392.936				Albemarle Corp.	Allianz Asset Management GmbH	192.872
							Luther King Capital Management Corp.	Salar del Hombre Muerto	389.622				China	China Merchants Fund Management Co. Ltd.	391.681				SQM	Deutsche Asset & Wealth Management	192.603
							Pzena Investment Management Inc.	Salar del Hombre Muerto	386.687				Greenbushes	China Merchants Fund Management Co. Ltd.	387.341				SQM	First Trust Advisors LP	191.982
							Norges Bank Investment Management	Greenbushes	384.837				Mount Marion	China Merchants Fund Management Co. Ltd.	370.733				SQM	Franklin Resources Inc.	190.595
							Yinhua Fund Management Co. Ltd.	Greenbushes	382.967				China	China Firms	366.72				SQM	BTG Pactual Global Asset Management Ltd.	189.491
							Toyota Motor Corp.	Salar de Olaroz	374.488				East Taijinair	China Firms	366.305				Core Lithium Ltd	Legal & General Investment Management Ltd.	188.782
							Westwood Management Corp.	Greenbushes	368.068				Jiajika	China Firms	362.875				Tianqi Lithium Corp.	ABC-CA Fund Management Co. Ltd.	188.535
							OppenheimerFunds Inc.	Greenbushes	362.004				West Taijinai Lake	China Firms	351.054				Sinomine Resource Grp Co Ltd	Truvalue Asset Management Co.,Ltd.	187.112
							Abrdn Holdings Limited	Salar de Atacama(SQM)	359.103				Jintaier Lake	China Firms	343.972				Sigma Lithium Corp.	Maven Securities Ltd.	186.8
							Adage Capital Management LP	Greenbushes	355.346				China	China Development Bank	342.851				Zangge Mining Co.	UBS SDIC Fund Management Co. Ltd.	186.68
							LSV Asset Management	Salar del Hombre Muerto	354.953				Chaerhan Lake	China Development Bank	326.388				Tianqi Lithium Corp.	Wanjia Asset Management Co. Ltd.	186.648
							Shenzhen Qianyuan Investment Co., Ltd.	Greenbushes	353.324				China	China Construction Bank Corp.	318.318				Albemarle Corp.	Nomura Asset Management Co. Ltd.	186.228
							BNY Asset Management	Salar de Atacama(Albemarle)	348.174				Chaerhan Lake	China Construction Bank Corp.	316.597				Albemarle Corp.	California State Teachers' Retirement System	185.011
							Adage Capital Management LP	Salar de Atacama(SQM)	339.166				China	China Cinda Asset Management Co. Ltd.	315.215				Tianqi Lithium Corp.	BNPP Asset Management Holding	184.18
							Dimensional Fund Advisors LP	Salar de Atacama(Albemarle)	333.27				Chaerhan Lake	China Cinda Asset Management Co. Ltd.	311.017				Tianqi Lithium Corp.	Harvest Fund Management Co. Ltd.	183.145
							Fairpointe Capital LLC	Salar del Hombre Muerto	329.139				China	China Asset Management Co. Ltd.	294.128				Sinomine Resource Grp Co Ltd	Global X Management Co. LLC	182.501
							AGF Management Ltd.	Greenbushes	327.952				Mount Marion	China Asset Management Co. Ltd.	288.835				Ganfeng Lithium Group	Global X Management Co. LLC	182.152
							Janus Henderson Investors US LLC	Salar de Atacama(Albemarle)	323.038				China	Chengdu Tianqi Industry Group Co. Ltd.	286.223				Tianqi Lithium Corp.	Bosera Asset Management Co. Ltd.	181.086
							Foord Asset Management Guernsey Ltd	Salar del Hombre Muerto	319.642				Greenbushes	Chengdu Tianqi Industry Group Co. Ltd.	282.432				Piedmont Lithium Inc	LG Chem Ltd.	180.304
							MultiConcept Fund Management S.A.	Salar del Hombre Muerto	319.642				Zhabuye	Chengdu Tianqi Industry Group Co. Ltd.	281.701				SQM	Credit Suisse Asset Management (Switzerland) Ltd.	180.253
							OFI Advisors LLC	Greenbushes	309.67				USA	Charles Schwab Investment Management Inc.	280.555				Sigma Lithium Corp.	Appian Way Asset Management LP	178.564
							T. Rowe Price Group Inc.	Salar del Hombre Muerto	307.97				Greenbushes	Charles Schwab Investment Management Inc.	280.043				IGO Ltd	UBS Asset Management AG	176.725
							Deutsche Asset & Wealth Management	Greenbushes	306.274				Atacama(Albemarle)	Charles Schwab Investment Management Inc.	277.201				AMG Critical Materials N.V.	Société Générale SA	173.731
							First Eagle Investment Management LLC	Greenbushes	301.066				Salar del Hombre Muerto	Charles Schwab Investment Management Inc.	270.182				Piedmont Lithium Inc	Vanguard Group Inc.	173.037
							Putnam LLC	Salar de Atacama(Albemarle)	298.137				Luxembourg	Candriam société en commandite par actions.	269.008				Ganfeng Lithium Group	JP Morgan Asset Management	170.526
							Paradice Investment Management Pty Ltd.	Mt Cattlin	298.053				Atacama(SQM)	Candriam société en commandite par actions.	261.923				AMG Critical Materials N.V.	Janus Henderson Group PLC	169.772
							Northern Trust Global Investments	Salar de Atacama(Albemarle)	297.463				Canada	Canada Pension Plan Investment Board	260.409				SQM	Compass Group LLC	169.708
							China Asset Management Co. Ltd.	Greenbushes	295.502				Greenbushes	Canada Pension Plan Investment Board	259.441				SQM	Itaú Administradora General de Fondos SA	169.344
							Anchor Bolt Capital LP	Greenbushes	294.701				Atacama(Albemarle)	Canada Pension Plan Investment Board	258.164				Albemarle Corp.	Vest Financial LLC	169.246
							Lichun Chen	Greenbushes	288.078				Brazil	Brazil Firms	257.21				Tianqi Lithium Corp.	E Fund Management Co. Ltd.	168.301
							Tibet Mining Asset Operation Co. Ltd.	Zhabuye	287.47				Cachoeira	Brazil Firms	257.019				SQM	Larrainvial Administradora De Fondos S.A.	168.176
							Franklin Resources Inc.	Silver Peak	282.691				USA	BNY Asset Management	253.867				Wesfarmers Ltd.	Norges Bank Investment Management	167.939
							BlackRock Inc.	Silver Peak	279.336				Greenbushes	BNY Asset Management	246.4				Zangge Mining Co.	Zangge Mining Company Limited ESOP	166.873
							Sculptor Capital Management Inc.	Salar del Hombre Muerto	273.178				Atacama(Albemarle)	BNY Asset Management	245.397				Albemarle Corp.	BNP Paribas Financial Markets SNC	166.792
							Macquarie Investment Management Business Trust	Greenbushes	273.032				Salar del Hombre Muerto	BNY Asset Management	241.788				Tianqi Lithium Corp.	Truvalue Asset Management Co.,Ltd.	165.216
							Invesco Great Wall Fund Management Co. Ltd	Greenbushes	271.817				Silver Peak	BNY Asset Management	240.445				Core Lithium Ltd	BlackRock Inc.	165.17
							River Road Asset Management LLC	Salar del Hombre Muerto	270.116				Atacama(SQM)	BNY Asset Management	239.037				Pilbara Minerals Ltd.	ETFS Management (AUS) Ltd.	163.906
							Administradora de Fondos de Pensiones Cuprum SA	Salar de Atacama(SQM)	263.74				Salar de Olaroz	BNY Asset Management	238.906				SQM	Jane Street Group LLC	162.872
							Thunderbird Partners LLP	Salar del Hombre Muerto	262.17				France	BNPP Asset Management Holding	233.767				Sayona Mining Ltd.	Brett Laurence Lynch	161.475
							Axiom Investors LLC	Salar de Atacama(SQM)	255.65				Mibra	BNPP Asset Management Holding	232.2				Sinomine Resource Grp Co Ltd	China Universal Asset Management Co. Ltd.	161.458
							Eaton Vance Management	Salar de Atacama(SQM)	253.709				USA	BlackRock Inc.	231.138				Albemarle Corp.	Frontier Capital Management Co LLC	160.971
							Geode Capital Management LLC	Salar de Atacama(Albemarle)	252.933				Salar del Hombre Muerto	BlackRock Inc.	230.646				Albemarle Corp.	BMO Asset Management Corp.	160.698
							DWS Investment Management Americas Inc.	Greenbushes	252.437				Greenbushes	BlackRock Inc.	228.057				SQM	Driehaus Capital Management LLC	160.431
							Bank of America Corp.	Salar de Atacama(Albemarle)	250.953				Atacama(Albemarle)	BlackRock Inc.	227.881				Albemarle Corp.	AllianceBernstein LP	160.106
							Australia Firms	Mount Marion	250.144				Atacama(SQM)	BlackRock Inc.	227.775				SQM	Schroder Investment Management Ltd.	160.07
							Sasco Capital Inc.	Salar del Hombre Muerto	249.068				Mount Marion	BlackRock Inc.	221.339				SQM	Teachers Insurance and Annuity Association-College Retirement Equities Fund	159.871
							DJE Kapital AG	Greenbushes	247.843				Silver Peak	BlackRock Inc.	218.704				SQM	JPMorgan Chase & Co.	158.821
							Columbus Circle Investors	Salar de Atacama(Albemarle)	243.755				Pilgangoora	BlackRock Inc.	217.706				Sayona Mining Ltd.	Paul Anthony Crawford	158.247
							Security Investors LLC	Greenbushes	243.654				Australia	Beng Teik Kuan	217.601				AMG Critical Materials N.V.	Eric E. Jackson	157.974
							SPF Beheer BV	Salar de Atacama(Albemarle)	241.945				Altura	Beng Teik Kuan	216.106				Albemarle Corp.	Caisse de dépôt et placement du Québec	157.944
							American Century Investment Management Inc	Salar del Hombre Muerto	232.587				China	Beijing Lianzhong Peer Biotechnology Co. Ltd.	214.04				Qinghai Salt Lake Industry Co.	Rosefinch Fund Management Co. Ltd.	157.896
							China Cinda Asset Management Co. Ltd.	Chaerhan Lake	232.169				Qarhan Lake	Beijing Lianzhong Peer Biotechnology Co. Ltd.	210.635				IGO Ltd	Australian Super Pty Ltd	157.118
							Tide Point Capital Management LP	Greenbushes	231.291				United Kingdom	Barclays PLC	206.008				Albemarle Corp.	Commonwealth Equity Services LLC	156.371
							BlackRock Inc.	Salar de Olaroz	229.066				Greenbushes	Barclays PLC	202.352				Tianqi Lithium Corp.	ICBC Credit Suisse Asset Management Co. Ltd.	156.367
							Janus Henderson Group PLC	Salar de Olaroz	226.858				Atacama(Albemarle)	Barclays PLC	202.299				Tibet Summit Resources Co	Xinjiang Tacheng International Resources Ltd.	156.037
							Russell Investment Management LLC	Salar del Hombre Muerto	224.366				China	Bank of China Co. Ltd. Qinghai Branch	198.998				Pilbara Minerals Ltd.	Peter Barrett Capp	155.917
							Point7 Asset Management LP	Greenbushes	219.16				Chaerhan Lake	Bank of China Co. Ltd. Qinghai Branch	195.021				Lithium Americas (Argentina) C	Van Eck Associates Corp.	155.288
							Norges Bank Investment Management	Salar de Atacama(Albemarle)	217.017				USA	Bank of America Corp.	189.122				Albemarle Corp.	AXA Investment Managers SA	154.711
							State Street Global Advisors Inc.	Silver Peak	216.494				Greenbushes	Bank of America Corp.	183.008				Pilbara Minerals Ltd.	Kenneth Edward Brinsden	154.297
							Zhongrong International Trust Co. Ltd.	Greenbushes	213.327				Atacama(Albemarle)	Bank of America Corp.	181.285				Pilbara Minerals Ltd.	Hermes Investment Management Ltd.	153.545
							Fullgoal Fund Management Co. Ltd.	Greenbushes	211.556				United Kingdom	Baillie Gifford & Co.	179.303				AMG Critical Materials N.V.	Global X Management Co. LLC	153.209
							Westwood Management Corp.	Salar de Atacama(Albemarle)	207.56				Greenbushes	Baillie Gifford & Co.	172.043				Albemarle Corp.	Russell Investment Management LLC	152.015
							OppenheimerFunds Inc.	Salar de Atacama(Albemarle)	204.141				Atacama(Albemarle)	Baillie Gifford & Co.	169.375				Albemarle Corp.	Grandfield & Dodd LLC	151.839
							Edge Asset Management Inc.	Greenbushes	202.301				Silver Peak	Baillie Gifford & Co.	169.288				Albemarle Corp.	Mariner LLC	151.252
							UBS Asset Management AG	Salar de Olaroz	202.189				USA	Axel Capital Management LLC	168.04				Tianqi Lithium Corp.	Ping An UOB Fund Management Co. Ltd.	151.228
							Adage Capital Management LP	Salar de Atacama(Albemarle)	200.386				Salar del Hombre Muerto	Axel Capital Management LLC	167.644				Lithium Americas (Argentina) C	Mirae Asset Global Investments Co. Ltd.	150.447
							Legal & General Investment Management Ltd.	Greenbushes	200.018				USA	Avalon Advisors LLC	155.235				Lithium Americas (Argentina) C	Global X Management Co. LLC	150.113
							Charles Schwab Investment Management Inc.	Greenbushes	196.711				Greenbushes	Avalon Advisors LLC	153.724				SQM	Morgan Stanley	149.908
							Northern Trust Global Investments	Salar del Hombre Muerto	195.605				Atacama(Albemarle)	Avalon Advisors LLC	151.576				Albemarle Corp.	California Public Employees' Retirement System	148.22
							Global X Management Co. LLC	Salar de Atacama(SQM)	194.528				Australia	Australian Super Pty Ltd	151.555				AMG Critical Materials N.V.	JPMorgan Chase & Co.	147.52
							Toyota Industries Corp.	Salar de Olaroz	193.035				Pilgangoora	Australian Super Pty Ltd	150.088				IGO Ltd	BetaShares Capital Ltd.	146.917
							James Derrick Calaway	Salar de Olaroz	192.985				Salar de Olaroz	Australian Super Pty Ltd	149.842				Albemarle Corp.	Principal Global Investors LLC	146.757
							Stelliam Investment Management LP	Greenbushes	190.517				Argentina	Argentina Firms	146.284				Sinomine Resource Grp Co Ltd	Citic Securities Co. Ltd.	146.651
							AGF Management Ltd.	Salar de Atacama(Albemarle)	184.939				Salar de Olaroz	Argentina Firms	137.129				Tianqi Lithium Corp.	Guotai Asset Mgmt Co. Ltd.	145.497
							Principal Global Investors LLC	Greenbushes	182.939				Australia	Anthony Peter Tse	136.546				Albemarle Corp.	Merrill Lynch Pierce Fenner & Smith Inc.	143.211
							Royce & Associates LP	Greenbushes	177.716				Mt Cattlin	Anthony Peter Tse	136.157				SQM	Moneda Administradora de Fondos de Invers	142.158
							Baron Capital Group Inc.	Salar de Atacama(SQM)	176.643				France	Amundi Asset Management SAS	130.23				Albemarle Corp.	T. Rowe Price Group Inc.	141.687
							Macquarie Investment Management Business Trust	Salar de Atacama(SQM)	174.949				Atacama(SQM)	Amundi Asset Management SAS	127.229				IGO Ltd	Teachers Insurance and Annuity Association-College Retirement Equities Fund	141.42
							OFI Advisors LLC	Salar de Atacama(Albemarle)	174.629				Greenbushes	Amundi Asset Management SAS	126.999				Sinomine Resource Grp Co Ltd	China Asset Management Co. Ltd.	140.803
							Deutsche Asset & Wealth Management	Salar de Atacama(Albemarle)	172.714				Salar del Hombre Muerto	Amundi Asset Management SAS	125.82				Albemarle Corp.	HSBC Global Asset Management (UK) Ltd.	140.567
							Frontier Capital Management Co LLC	Salar del Hombre Muerto	172.266				Atacama(Albemarle)	Amundi Asset Management SAS	123.727				Albemarle Corp.	National Pension Service	140.173
							Jennison Associates LLC	Silver Peak	171.562				USA	American Century Investment Management Inc	123.498				Zangge Mining Co.	Zhejiang Hongyue Private Fund Management Co. Ltd.	139.744
							First Eagle Investment Management LLC	Salar de Atacama(Albemarle)	169.777				Greenbushes	American Century Investment Management Inc	122.934				SQM	Capital Advisors Inc.	139.288
							RBC Global Asset Management Inc.	Greenbushes	169.199				Atacama(Albemarle)	American Century Investment Management Inc	122.031				Albemarle Corp.	Envestnet Asset Management Inc.	138.844
							Allspring Global Investments LLC	Greenbushes	168.729				USA	American Beacon Advisors Inc.	117.172				SQM	Administradora General de Fondos Security SA	138.767
							National Council for Social Security Fund	Greenbushes	166.306				Salar del Hombre Muerto	American Beacon Advisors Inc.	116.262				Albemarle Corp.	Mitsubishi UFJ Asset Management Co. Ltd.	137.656
							Anchor Bolt Capital LP	Salar de Atacama(Albemarle)	166.188				Germany	Allianz Asset Management GmbH	115.468				SQM	Liontrust Asset Management PLC	137.199
							Creat Resources Holdings Ltd.	Mt Cattlin	164				Greenbushes	Allianz Asset Management GmbH	113.361				Ganfeng Lithium Group	Allianz Asset Management GmbH	135.735
							Invesco Ltd.	Greenbushes	158.645				Atacama(Albemarle)	Allianz Asset Management GmbH	112.702				Albemarle Corp.	Davenport & Co. LLC	135.035
							Geode Capital Management LLC	Salar del Hombre Muerto	158.632				Mt Cattlin	Allianz Asset Management GmbH	110.979				Qinghai Salt Lake Industry Co.	Harvest Fund Management Co. Ltd.	134.807
							Abu Dhabi Investment Authority	Greenbushes	158.426				Salar del Hombre Muerto	Allianz Asset Management GmbH	104.931				Albemarle Corp.	Tredje AP-fonden	132.751
							Macquarie Investment Management Business Trust	Salar de Atacama(Albemarle)	153.968				Australia	Allan Charles Buckler	104.731				Zangge Mining Co.	Citic Securities Co. Ltd.	131.446
							Goldman Sachs Asset Management LP	Salar del Hombre Muerto	152.657				Altura	Allan Charles Buckler	102.181				SQM	Royal London Asset Management Ltd.	130.97
							New York State Common Retirement Fund	Greenbushes	152.164				China	Agricultural Bank of China Ltd.	100.943				Lithium Americas (Argentina) C	John Anthony Kanellitsas	130.336
							BNY Asset Management	Salar del Hombre Muerto	150.107				Chaerhan Lake	Agricultural Bank of China Ltd.	100.396				IGO Ltd	Netwealth Investments Ltd.	128.958
							Baring Asset Management Ltd.	Greenbushes	144.522				Australia	AGF Management Ltd.	99.794				Sayona Mining Ltd.	BlackRock Inc.	128.587
							Nikko Asset Management Co. Ltd.	Greenbushes	143.606				Greenbushes	AGF Management Ltd.	99.7477				Tianqi Lithium Corp.	Huashang Fund Management Co. Ltd.	128.489
							Norges Bank Investment Management	Salar del Hombre Muerto	142.756				China	AEGON-Industrial Fund Mgmt Co.	18670.9				Pilbara Minerals Ltd.	Netwealth Investments Ltd.	128.317
							DWS Investment Management Americas Inc.	Salar de Atacama(Albemarle)	142.354				Greenbushes	AEGON-Industrial Fund Mgmt Co.	17459.9				SQM	BICE Inversiones Administradora General de Fondos SA	128.202
							Capital Research & Mgmt Co.	Silver Peak	141.796				Mount Marion	AEGON-Industrial Fund Mgmt Co.	13333.2				Zangge Mining Co.	GF Securities Asset Management Co.Ltd.	128.026
							DJE Kapital AG	Salar de Atacama(Albemarle)	139.764				United Kingdom	Aegon Asset Management UK Plc	9787				SQM	Boston Common Asset Management LLC	126.838
							UBS Asset Management AG	Greenbushes	139.493				Greenbushes	Aegon Asset Management UK Plc	9454				Zangge Mining Co.	China Merchants Securities Asset Management Co. Ltd.	126.52
							Security Investors LLC	Salar de Atacama(Albemarle)	137.401				Atacama(Albemarle)	Aegon Asset Management UK Plc	8059				Sigma Lithium Corp.	Damask Inc.	125.607
							Schweizerische Nationalbank	Greenbushes	133.022				Silver Peak	Aegon Asset Management UK Plc	6541.92				SQM	Border To Coast Pensions Partnership Ltd.	125.283
							Tide Point Capital Management LP	Salar de Atacama(Albemarle)	130.429				Chile	Administradora de Fondos de Pensiones PlanVital SA	5000				Albemarle Corp.	Twin Tree Management LP	124.877
							New Jersey Division of Investment	Greenbushes	129.723				Atacama(SQM)	Administradora de Fondos de Pensiones PlanVital SA	4847.03				Ganfeng Lithium Group	Norges Bank Investment Management	124.85
							Chengdu Tianqi Industry Group Co. Ltd.	Zhabuye	129.131				Chile	Administradora de Fondos de Pensiones Modelo SA	4548				Qinghai Salt Lake Industry Co.	E Fund Management Co. Ltd.	123.97
							Franco Mignacco	Cauchari-Olaroz	127.634				Atacama(SQM)	Administradora de Fondos de Pensiones Modelo SA	3654.77				SQM	Teachers' Retirement System of the State of Kentucky	123.834
							Massachusetts Financial Services Company	Salar del Hombre Muerto	126.377				Chile	Administradora de Fondos de Pensiones Cuprum SA	3259.24				Mineral Resources Ltd.	Australian Super Pty Ltd	123.761
							Renaissance Technologies LLC	Salar de Atacama(SQM)	126.369				Atacama(SQM)	Administradora de Fondos de Pensiones Cuprum SA	3163.01				Mineral Resources Ltd.	Australian Foundation Investment Co. Ltd.	122.909
							Legg Mason, Inc.	Greenbushes	125.441				United Kingdom	abrdn PLC	3105.37				Toyota Tsusho Corp	Vanguard Group Inc.	122.502
							Goldman Sachs Group Inc.	Greenbushes	125.058				Atacama(SQM)	abrdn PLC	3032.6				SQM	Russell Investment Management LLC	121.495
							Point7 Asset Management LP	Salar de Atacama(Albemarle)	123.588				China	ABC-CA Fund Management Co. Ltd.	2976				Sinomine Resource Grp Co Ltd	Franklin Templeton Sealand Fund Management Co. Ltd.	121.424
							Deutsche Bank AG	Greenbushes	123.249				Mount Marion	ABC-CA Fund Management Co. Ltd.	2845.51				Pilbara Minerals Ltd.	Credit Suisse Asset Management (Switzerland) Ltd.	121.383
							Hardman Johnston Global Advisors LLC	Greenbushes	122.388				Qarhan Lake	Zangge Mining Company Limited	2340.62				Sayona Mining Ltd.	Van Eck Associates Corp.	120.973
							Hahn Capital Management LLC	Greenbushes	121.747				Tibet Zangge Venture Capital Group Co. Ltd.	Zangge Mining Company Limited	2318.51				AMG Critical Materials N.V.	Baker Steel Capital Managers LLP	120.461
							Dimensional Fund Advisors LP	Salar de Atacama(SQM)	118.408				Sichuan Yonghong Industrial Co., Ltd.	Zangge Mining Company Limited	2303.73				Mineral Resources Ltd.	Northern Trust Global Investments	120.36
							Scout Investments Inc.	Greenbushes	117.33				Yong Ming Xiao	Zangge Mining Company Limited	2289.27				Qinghai Salt Lake Industry Co.	Truvalue Asset Management Co.,Ltd.	120.182
							Liangbin Li	Mount Marion	116.763				Beijing Lianzhong Peer Biotechnology Co. Ltd.	Zangge Mining Company Limited	2240.55				Pilbara Minerals Ltd.	UBS Asset Management AG	120.069
							Teachers Insurance and Annuity Association-College Retirement Equities Fund	Salar de Atacama(SQM)	114.872				Ningbo Meishan Bondedn Port Area Xinsha Hongyun Investment Management Co. Ltd.	Zangge Mining Company Limited	2233.51				Toyota Tsusho Corp	MUFG Bank Ltd.	119.867
							Edge Asset Management Inc.	Salar de Atacama(Albemarle)	114.081				Jiajika	Youngy Invt Hldg Grp Co.Ltd.	2210				Pilbara Minerals Ltd.	Milford Asset Management LTD	119.093
							Legal & General Investment Management Ltd.	Salar de Atacama(Albemarle)	112.794				China Firms	Youngy Invt Hldg Grp Co.Ltd.	2155.09				Albemarle Corp.	Credit Suisse Asset Management (Switzerland) Ltd.	118.87
							STRS Ohio	Salar de Atacama(SQM)	111.787				Yichun	Yichun Tantalum Co Ltd	2148.04				Allkem Ltd	Australian Super Pty Ltd	118.491
							Charles Schwab Investment Management Inc.	Salar de Atacama(Albemarle)	110.929				Jiangxi Tungsten Holding Group Co., LTD	Yichun Tantalum Co Ltd	2102.32				Albemarle Corp.	New York State Teachers' Retirement System	117.832
							Richard Phillip Seville	Salar de Olaroz	110.376				East Taijinair	Western Mining Group Co. Ltd.	2068.78				IGO Ltd	Charles Schwab Investment Management Inc.	117.556
							Vanguard Group Inc.	Salar de Olaroz	110.11				China Firms	Western Mining Group Co. Ltd.	1931.04				SQM	NS Partners Ltd	117.457
							Changsheng Fund Management Co. Ltd.	Greenbushes	109.555				Salar de Olaroz	Toyota Tsusho Corp.	1871.38				Qinghai Salt Lake Industry Co.	Huatai-PineBridge Fund Management Co. Ltd.	117.275
							China Great Wall Asset Management Co. Ltd.	Chaerhan Lake	109.292				Toyota Motor Corp.	Toyota Tsusho Corp.	1832.76				Albemarle Corp.	New York State Common Retirement Fund	117.108
							DWS Investment GmbH	Salar del Hombre Muerto	108.017				Toyota Industries Corp.	Toyota Tsusho Corp.	1828.09				Toyota Tsusho Corp	BlackRock Inc.	117.031
							Stelliam Investment Management LP	Salar de Atacama(Albemarle)	107.436				Nomura Asset Management Co. Ltd.	Toyota Tsusho Corp.	1819.75				Albemarle Corp.	Walleye Capital LLC	116.134
							GE Asset Management Inc.	Greenbushes	106.991				Zhabuye	Tibet Mineral Dev. Co. LTD	1808.3				Albemarle Corp.	GWL Investment Management Ltd.	115.852
							John Anthony Kanellitsas	Cauchari-Olaroz	106.164				Tibet Mining Asset Operation Co. Ltd.	Tibet Mineral Dev. Co. LTD	1802.19				Core Lithium Ltd	Van Eck Associates Corp.	115.386
							Goldman Sachs Group Inc.	Salar del Hombre Muerto	106.106				Greenbushes	Tianqi Lithium Corp.	1707.48				SQM	Columbia Management Investment Advisers LLC	115.048
							Anthony Peter Tse	Mt Cattlin	105.428				Zhabuye	Tianqi Lithium Corp.	1704.4				SQM	RBC Global Asset Management Inc.	114.852
							California Public Employees' Retirement System	Greenbushes	103.362				Chengdu Tianqi Industry Group Co. Ltd.	Tianqi Lithium Corp.	1674.86				Tianqi Lithium Corp.	Jinzhi Jiang	114.628
							Principal Global Investors LLC	Salar de Atacama(Albemarle)	103.163				Jing Zhang	Tianqi Lithium Corp.	1571.54				Mineral Resources Ltd.	Gold Fields Ltd.	113.955
							Davenport & Co. LLC	Greenbushes	102.857				Wei Ping Jiang	Tianqi Lithium Corp.	1519.37				Allkem Ltd	Invesco Ltd.	113.328
							California State Teachers' Retirement System	Greenbushes	102.597				China Securities Finance Corporation Ltd.	Tianqi Lithium Corp.	1500.13				Ganfeng Lithium Group	UBS SDIC Fund Management Co. Ltd.	113.239
							China Southern Asset Management Co. Ltd.	Greenbushes	102.367				HSBC Jintrust Fund Management Co. Ltd.	Tianqi Lithium Corp.	1420.37				Chengxin Lithium Group	BYD Company Ltd.	113.119
							Lord Abbett & Co. LLC	Greenbushes	101.812				Harvest Fund Management Co. Ltd.	Tianqi Lithium Corp.	1358.66				Albemarle Corp.	Hardman Johnston Global Advisors LLC	112.203
							ZKB Asset Management	Greenbushes	101.709				E Fund Management Co. Ltd.	Tianqi Lithium Corp.	1356.37				Albemarle Corp.	Korea Investment Corp.	112.085
							Cove Street Capital LLC	Salar del Hombre Muerto	101.587				China Universal Asset Management Co. Ltd.	Tianqi Lithium Corp.	1286.06				Sigma Lithium Corp.	Cesar Chicayban	111.123
							FMR LLC	Cauchari-Olaroz	101.577				Yinhua Fund Management Co. Ltd.	Tianqi Lithium Corp.	1202.3				Mineral Resources Ltd.	Amundi Asset Management SAS	110.874
							Charles Bernard Francis Whitfield	Mt Cattlin	101.572				China Merchants Fund Management Co. Ltd.	Tianqi Lithium Corp.	1137				Albemarle Corp.	State Board of Administration of Florida	109.688
							Morgan Stanley	Greenbushes	100.941				Shenzhen Qianyuan Investment Co., Ltd.	Tianqi Lithium Corp.	1133.2				Toyota Tsusho Corp	Nikko Asset Management Co. Ltd.	109.676
							Lincoln Financial Investments Corp.	Greenbushes	100.649				EARNEST Partners LLC	Tianqi Lithium Corp.	1125.25				Albemarle Corp.	INTECH Investment Management LLC	109.271
							Janus Henderson Investors US LLC	Salar del Hombre Muerto	100.341				AEGON-Industrial Fund Mgmt Co.	Tianqi Lithium Corp.	1117.83				Lithium Americas (Argentina) C	Franco Mignacco	108.573
							Royce & Associates LP	Salar de Atacama(Albemarle)	100.217				HuaAn Fund Management Company Ltd.	Tianqi Lithium Corp.	1092.93				Pilbara Minerals Ltd.	Danielle Sharon Tudehope	107.943
							USA Firms	Mount Marion	100				Guotai Asset Mgmt Co. Ltd.	Tianqi Lithium Corp.	1075.65				Albemarle Corp.	D.E. Shaw & Co. LP	107.824
													Everbright Pramerica Fund Management Co.	Tianqi Lithium Corp.	1063.28				Sayona Mining Ltd.	BNPP Asset Management Holding	107.795
													Orient Fund Management Co. Ltd.	Tianqi Lithium Corp.	1009.6				Toyota Tsusho Corp	Daiwa Asset Management Co. Ltd.	107.431
													Atacama(SQM)	SQM	1000				SQM	STRS Ohio	107.15
													Inversiones SQYA S.A	SQM	999.47				Mineral Resources Ltd.	JP Morgan Asset Management	107.115
													Tianqi Lithium Corp.	SQM	975.653				Albemarle Corp.	Samlyn Capital LLC	106.498
													BlackRock Inc.	SQM	957.695				AMG Critical Materials N.V.	Goldman Sachs Asset Management LP	106.035
													FMR LLC	SQM	915.462				Pilbara Minerals Ltd.	Baker Steel Capital Managers LLP	105.847
													Vanguard Group Inc.	SQM	874.32				Pilbara Minerals Ltd.	Deutsche Asset & Wealth Management	105.261
													Kowa Company Ltd.	SQM	870.6				Albemarle Corp.	Group One Trading L.P.	104.696
													abrdn PLC	SQM	861.675				Sayona Mining Ltd.	Allan Charles Buckler	103.985
													Global X Management Co. LLC	SQM	856.535				Albemarle Corp.	ALPS Advisors Inc.	103.23
													Mirae Asset Global Investments Co. Ltd.	SQM	842.885				Ganfeng Lithium Group	China Asset Management Co. Ltd.	103.18
													EARNEST Partners LLC	SQM	836.819				Core Lithium Ltd	Norges Bank Investment Management	103.082
													Administradora de Fondos de Pensiones Cuprum SA	SQM	825.467				Arcadium Lithium plc	GWL Investment Management Ltd.	102.672
													ClearBridge Investments LLC	SQM	820.42				SQM	Eaton Vance Management	102.501
													Macquarie Investment Management Business Trust	SQM	812.47				Sigma Lithium Corp.	BTG Pactual Serviços Financeiros S.A. Distribuidora de Títulos e Valores Mobiliá	102.168
													Norges Bank Investment Management	SQM	806.71				Arcadium Lithium plc	ALPS Advisors Inc.	102.167
													State Street Global Advisors Inc.	SQM	778.688				Albemarle Corp.	DNB Asset Management AS	102.02
													Citadel Advisors LLC	SQM	743.203				SQM	Goldman Sachs Group Inc.	101.772
													Millennium Management LLC	SQM	731.749				Albemarle Corp.	Ossiam	101.576
													Administradora de Fondos de Pensiones Modelo SA	SQM	711.377				Albemarle Corp.	PGGM	101.208
													Marshall Wace LLP	SQM	704.031				Albemarle Corp.	Adage Capital Management LP	100.885
													Invesco Capital Management LLC	SQM	702.862				Ganfeng Lithium Group	Truvalue Asset Management Co.,Ltd.	100.738
													Northern Trust Global Investments	SQM	697.352				Albemarle Corp.	AQR Capital Management LLC	100.357
													RWC Partners Ltd.	SQM	686.605				Albemarle Corp.	Bridgewater Associates LP	99.7255
													Grantham Mayo Van Otterloo & Co LLC	SQM	685.788				Australia	Greenbushes	212000
													BNY Asset Management	SQM	643.479				Chile	Atacama(SQM)	165500
													Candriam société en commandite par actions.	SQM	642.709				Australia	Pilgangoora	90215
													Administradora de Fondos de Pensiones PlanVital SA	SQM	633.204				Australia	Wodgina	67577
													Dimensional Fund Advisors LP	SQM	628.305				Australia	Mount Marion	51438
													Itaú Administradora General de Fondos SA	SQM	618				Chile	Atacama(Albemarle)	50000
													Amundi Asset Management SAS	SQM	611.516				Australia	Altura	32717
													SEI Investments Co.	SQM	603.058				China	Chaerhan Lake	30831
													RobecoSAM AG	SQM	595.945				Zimbabwe	Bikita	29063
													Morgan Stanley	SQM	594.14				Argentina	Salar del Hombre Muerto	27994
													Bikita	Sinomine Resource Grp Co Ltd	582.4				Australia	Mt Cattlin	27005
													China Nonferrous Metal Mining (Group) Co. Ltd.	Sinomine Resource Grp Co Ltd	572.615				Argentina	Salar de Olaroz	20836
													Meichun Sun	Sinomine Resource Grp Co Ltd	555.483				Australia	Mt Holland - Lithium	20400
													Haihua Zhong	Sinomine Resource Grp Co Ltd	537.01				China	Yichun	13975
													Shenzhen Oriental Fortune Venture Capital Management Co. Ltd.	Sinomine Resource Grp Co Ltd	531.913				Brazil	Grota do Cirilo	13742
													National Council for Social Security Fund	Sinomine Resource Grp Co Ltd	526.927				Brazil	Mibra	13206
													Pingwei Wang	Sinomine Resource Grp Co Ltd	525.579				Canada	North American Lithium	12681
													Haitong M&A (Shanghai) Private Fund Management Co. Ltd.	Sinomine Resource Grp Co Ltd	524.633				China	Qarhan Lake	12000
													West Taijinair	Qinghai Technology development Co., LTD	519.305				China	East Taijinair	11942
													Zhongxin Guoan	Qinghai Technology development Co., LTD	516.308				Argentina	Pastos Grandes	10000
													Chaerhan Lake	Qinghai Salt Lake Industry Co.,Ltd	508.818				China	Qinghai Yiliping	9454
													Qinghai State-owned Assets Investment and Management Co. Ltd.	Qinghai Salt Lake Industry Co.,Ltd	508.001				Australia	Finniss	8161
													Sinochem Holdings Corporation Ltd.	Qinghai Salt Lake Industry Co.,Ltd	491.162				China	Jiajika	8088
													ICBC Financial Asset Investment Co. Ltd.	Qinghai Salt Lake Industry Co.,Ltd	487.436				Zimbabwe	Arcadia	7424
													China Development Bank	Qinghai Salt Lake Industry Co.,Ltd	472.402				Argentina	Cauchari-Olaroz	6000
													Postal Savings Bank Of China Co. Ltd. Qinghai Branch	Qinghai Salt Lake Industry Co.,Ltd	467.193				China	Zhabuye	6000
													China Construction Bank Corp.	Qinghai Salt Lake Industry Co.,Ltd	466.843				USA	Silver Peak	5000
													Bank of China Co. Ltd. Qinghai Branch	Qinghai Salt Lake Industry Co.,Ltd	460.861				China	West Taijinai Lake	5000
													Agricultural Bank of China Ltd.	Qinghai Salt Lake Industry Co.,Ltd	450.136				China	West Taijinair	5000
													China Cinda Asset Management Co. Ltd.	Qinghai Salt Lake Industry Co.,Ltd	438.979				Argentina	Sal de Vida	4478
													West Taijinai Lake	Qinghai Hengxin Rongliye Technology Co.Ltd.	435.956				Canada	Tanco	4045
													Jintaier Lake	Qinghai Hengxin Rongliye Technology Co.Ltd.	431.281				Zimbabwe	Sabi Star	2968
													China Firms	Qinghai Hengxin Rongliye Technology Co.Ltd.	428.184				China	Xiangyuan	2903
													Pilgangoora	Pilbara Minerals Ltd.	426.87				Argentina	Sal de los Angeles	2500
													Australian Super Pty Ltd	Pilbara Minerals Ltd.	422.365				Brazil	Cachoeira	2210
													RCF Management LLC	Pilbara Minerals Ltd.	421.652				China	Lakkor Tso Salt Lake	1320
													Contemporary Amperex Technology Co. Ltd.	Pilbara Minerals Ltd.	416.617				Portugal	Alvarroes	1236
													Ganfeng Lithium Group Co. Ltd.	Pilbara Minerals Ltd.	411.897				China	Jintaier Lake	1000
													Mineral Resources Ltd.	Pilbara Minerals Ltd.	411.825				BlackRock Inc.	USA	48906.2
													Vanguard Group Inc.	Pilbara Minerals Ltd.	405.967				Vanguard Group Inc.	USA	47152.7
													Posco Holdings Inc.	Pilbara Minerals Ltd.	404.637				Inversiones SQYA S.A	Chile	43819.6
													GO ETF Solutions LLP	Pilbara Minerals Ltd.	401.767				State Street Global Advisors Inc.	USA	40155.6
													Global X Management Co. LLC	Pilbara Minerals Ltd.	397.518				Tianqi Lithium Corp.	China	38944.7
													Norges Bank Investment Management	Pilbara Minerals Ltd.	392.936				China Firms	China	32001.5
													BlackRock Inc.	Pilbara Minerals Ltd.	392.884				Capital Research and Management Co.	USA	23646.1
													Van Eck Associates Corp.	Pilbara Minerals Ltd.	391.681				Chengdu Tianqi Industry Group Co. Ltd.	China	14305
													Xue Investments Pty Ltd.	Pilbara Minerals Ltd.	389.533				Jiangxi Tungsten Holding Group Co., LTD	China	13975
													Huicen Capital Pty Ltd.	Pilbara Minerals Ltd.	388.421				Norges Bank Investment Management	Norway	11025.5
													Altura	Morella Corp.	387.341				Global X Management Co. LLC	USA	9359.72
													Allan Charles Buckler	Morella Corp.	383.987				Franklin Resources Inc.	USA	8687.13
													Ningbo Shanshan Co. Ltd.	Morella Corp.	375.544				JPMorgan Chase & Co.	USA	8401.69
													Maxwell Terry Smith	Morella Corp.	374.228				Geode Capital Management LLC	USA	7607.74
													Farjoy Pty Ltd.	Morella Corp.	373.301				Australian Super Pty Ltd	Australia	7062.32
													Paul Kevin Mantell	Morella Corp.	370.086				Ganfeng Lithium Group Co. Ltd.	China	7055.57
													James Stuart Brown	Morella Corp.	366.72				Christopher James Ellison	Australia	6885.02
													Beng Teik Kuan	Morella Corp.	365.501				Liangbin Li	China	6517.5
													Mount Marion	Mineral Resources Ltd.	362.875				A0 Investimentos Ltda.	Brazil	6020.37
													Christopher James Ellison	Mineral Resources Ltd.	357.373				Citigroup Inc.	USA	5807.58
													Fidelity International Ltd.	Mineral Resources Ltd.	356.623				PRIMECAP Management Co.	USA	5707.48
													Magellan Asset Management Ltd.	Mineral Resources Ltd.	350.27				Van Eck Associates Corp.	USA	5613.43
													Vanguard Group Inc.	Mineral Resources Ltd.	347.738				T. Rowe Price Group Inc.	USA	5476.46
													BlackRock Inc.	Mineral Resources Ltd.	342.851				Dimensional Fund Advisors LP	USA	5212.01
													Dimensional Fund Advisors LP	Mineral Resources Ltd.	341.116				Zhongxin Guoan	China	5000
													Goldman Sachs Asset Management LP	Mineral Resources Ltd.	335.326				Wellington Management Group LLP	USA	4945.08
													Global X Management Co. LLC	Mineral Resources Ltd.	334.621				Mirae Asset Global Investments Co. Ltd.	South Korea	4935.3
													Norges Bank Investment Management	Mineral Resources Ltd.	328.32				Yandal Investments Pty. Ltd..	Australia	4704.59
													D&C Geraghty Pty. Ltd.	Mineral Resources Ltd.	326.285				Fidelity International Ltd.	Bermuda	4630.35
													Victory Capital Management Inc.	Mineral Resources Ltd.	321.846				Baillie Gifford & Co.	United Kingdom	4534.94
													Thornburg Investment Management Inc.	Mineral Resources Ltd.	321.299				Administradora de Fondos de Pensiones Habitat SA	Chile	4190.29
													Wilson Asset Management (International) Pty Ltd.	Mineral Resources Ltd.	317.021				Amundi Asset Management SAS	France	4130.35
													State Street Global Advisors Inc.	Mineral Resources Ltd.	316.637				Administradora de Fondos de Pensiones Cuprum SA	Chile	4020.29
													Van Eck Associates Corp.	Mineral Resources Ltd.	315.215				BNY Asset Management	USA	3902.5
													GO ETF Solutions LLP	Mineral Resources Ltd.	308.064				Legal & General Investment Management Ltd.	United Kingdom	3893.25
													Teachers Insurance and Annuity Association-College Retirement Equities Fund	Mineral Resources Ltd.	307.28				Millennium Management LLC	USA	3622.77
													Salar de Olaroz	Jujuy Energia y Mineria	305.799				Qinghai State-owned Assets Investment and Management Co. Ltd.	China	3622.64
													Argentina Firms	Jujuy Energia y Mineria	301.477				China Nonferrous Metal Mining (Group) Co. Ltd.	China	3610.44
													Alvarroes	Grupo Mota	300.055				AFP Provida SA	Chile	3577.59
													Portugal Firms	Grupo Mota	297.463				Northern Trust Global Investments	United Kingdom	3509.59
													Mount Marion	Ganfeng Lithium Group	296.231				Administradora de Fondos de Pensiones Capital SA	Chile	3477.66
													Liangbin Li	Ganfeng Lithium Group	294.683				Posco Holdings Inc.	South Korea	3353.02
													Xiaoshen Wang	Ganfeng Lithium Group	289.575				Grantham Mayo Van Otterloo & Co. LLC	USA	3299.06
													Shanghai Rosefinch Asset Management Co., Ltd.	Ganfeng Lithium Group	288.835				Morgan Stanley	USA	3244
													Samsung Asset Management Co. Ltd.	Ganfeng Lithium Group	287.74				Columbia Management Investment Advisers LLC	USA	2815.28
													China Universal Asset Management Co. Ltd.	Ganfeng Lithium Group	283.695				Tibet Zangge Venture Capital Group Co. Ltd.	China	2762.4
													Pacific Asset Management Co. Ltd.	Ganfeng Lithium Group	282.432				Kowa Company Ltd.	Japan	2612.24
													Zhong Ou Fund Management Co., Ltd	Ganfeng Lithium Group	281.701				RobecoSAM AG	Switzerland	2539.58
													GF Fund Management Co. Ltd.	Ganfeng Lithium Group	279.814				Invesco Capital Management LLC	USA	2510.91
													ABC-CA Fund Management Co. Ltd.	Ganfeng Lithium Group	267.472				Bank of America Corp.	USA	2347.32
													Haibo Shen	Ganfeng Lithium Group	266.193				Xiaoshen Wang	China	2335.03
													Guotai Asset Mgmt Co. Ltd.	Ganfeng Lithium Group	265.821				ICBC Financial Asset Investment Co. Ltd.	China	2334.15
													Shenzhen Gemboom Investment Management Co., Ltd.	Ganfeng Lithium Group	262.551				Weiping Jiang	China	2309.64
													E Fund Management Co. Ltd.	Ganfeng Lithium Group	261.923				Argentina Firms	Argentina	2281.06
													National Council for Social Security Fund	Ganfeng Lithium Group	260.409				Brazil Firms	Brazil	2210
													HSBC Jintrust Fund Management Co. Ltd.	Ganfeng Lithium Group	259.822				Jane Street Group LLC	USA	2121.99
													Global X Management Co. LLC	Ganfeng Lithium Group	259.441				EARNEST Partners LLC	USA	2084.18
													China Asset Management Co. Ltd.	Ganfeng Lithium Group	258.164				Ningbo Meishan Bondedn Port Area Xinsha Hongyun Investment Management Co. Ltd.	China	2077.38
													ICBC Credit Suisse Asset Management Co. Ltd.	Ganfeng Lithium Group	257.21				China Development Bank	China	2026.63
													Vanguard Group Inc.	Ganfeng Lithium Group	257.019				BNPP Asset Management Holding	France	2018.71
													China Merchants Fund Management Co. Ltd.	Ganfeng Lithium Group	253.867				abrdn PLC	United Kingdom	1979.83
													Rosefinch Fund Management Co. Ltd.	Ganfeng Lithium Group	250.971				Charles Schwab Investment Management Inc.	USA	1921.74
													China Southern Asset Management Co. Ltd.	Ganfeng Lithium Group	250.417				UBS Asset Management AG	Switzerland	1906.26
													Fullgoal Fund Management Co. Ltd.	Ganfeng Lithium Group	246.4				ProShare Advisors LLC	USA	1852.63
													Norges Bank Investment Management	Ganfeng Lithium Group	245.872				First Sentier Investors (Australia) IM Ltd	Australia	1809.01
													Yinhua Fund Management Co. Ltd.	Ganfeng Lithium Group	244.34				Teachers Insurance and Annuity Association-College Retirement Equities Fund	USA	1797.08
													Wanjia Asset Management Co. Ltd.	Ganfeng Lithium Group	244.257				Sinochem Holdings Corporation Ltd.	China	1788.03
													Huatai-PineBridge Fund Management Co. Ltd.	Ganfeng Lithium Group	243.793				Pictet Asset Management Ltd.	United Kingdom	1636.11
													AEGON-Industrial Fund Mgmt Co.	Ganfeng Lithium Group	240.203				Lazard Asset Management LLC	USA	1610
													Handelsbanken Asset Management	Ganfeng Lithium Group	239.037				First Trust Advisors LP	USA	1569.52
													Jianlang Xiong	Ganfeng Lithium Group	238.573				Shaanxi Coal and Chemical Industry Group Co.Ltd.	China	1529.48
													Mt Cattlin	Galaxy Resources Ltd.	233.767				Bank of China Co. Ltd. Qinghai Branch	China	1436.21
													New York Life Investment Management LLC	Galaxy Resources Ltd.	232.856				Eaton Vance Management	USA	1298.1
													Paradice Investment Management Pty Ltd.	Galaxy Resources Ltd.	232.837				Perpetual Ltd.	Australia	1279.8
													GO ETF Solutions LLP	Galaxy Resources Ltd.	231.316				JP Morgan Asset Management	USA	1267.39
													Van Eck Associates Corp.	Galaxy Resources Ltd.	231.138				U.S. Bancorp Asset Management Inc.	USA	1249.16
													Norges Bank Investment Management	Galaxy Resources Ltd.	230.703				Portugal Firms	Portugal	1236
													Nero Resource Fund Pty Ltd	Galaxy Resources Ltd.	230.646				Citadel Advisors LLC	USA	1220.73
													Anthony Peter Tse	Galaxy Resources Ltd.	229.488				Shapiro Capital Management LLC	USA	1214.19
													Creat Resources Holdings Ltd.	Galaxy Resources Ltd.	228.865				Yong Ming Xiao	China	1189.06
													Global X Management Co. LLC	Galaxy Resources Ltd.	228.306				Postal Savings Bank Of China Co. Ltd. Qinghai Branch	China	1185.56
													Martin Ronald Rowley	Galaxy Resources Ltd.	228.057				General Motors Co.	USA	1185.28
													Dimensional Fund Advisors LP	Galaxy Resources Ltd.	227.881				Toyota Motor Corp.	Japan	1177.75
													Endeavor Asset Management Pty. Ltd.	Galaxy Resources Ltd.	227.775				Piedmont Lithium Inc.	USA	1154.3
													Allianz Asset Management GmbH	Galaxy Resources Ltd.	227.344				BetaShares Capital Ltd.	Australia	1131.17
													Commodity Capital AG	Galaxy Resources Ltd.	227.201				Zhejiang Huayou Holding Group Co., Ltd.	China	1129.93
													Cachoeira	Companhia Brasileira de Lítio	225.518				Toyota Tsusho Corp.	Japan	1123.87
													Brazil Firms	Companhia Brasileira de Lítio	224.232				BNP Paribas Securities Corp.	USA	1054.66
													Salar del Hombre Muerto	Arcadium Lithium plc	223.854				Tibet Mining Asset Operation Co. Ltd.	China	983.04
													BlackRock Inc.	Arcadium Lithium plc	222.999				CI Global Asset Management	Canada	948.587
													Vanguard Group Inc.	Arcadium Lithium plc	221.72				Coatue Management LLC	USA	946.001
													FMR LLC	Arcadium Lithium plc	221.339				Fraserx PTY Ltd.	Australia	940.537
													Wellington Management Group LLP	Arcadium Lithium plc	221.216				China Securities Finance Corporation Ltd.	China	936.691
													BNY Asset Management	Arcadium Lithium plc	219.644				Barclays PLC	United Kingdom	933.479
													Columbia Management Investment Advisers LLC	Arcadium Lithium plc	218.704				Principal Global Investors LLC	USA	925.752
													Ensign Peak Advisors Inc.	Arcadium Lithium plc	216.106				Colonial First State Investments Ltd.	Australia	899.17
													State Street Global Advisors Inc.	Arcadium Lithium plc	214.939				SEI Investments Co.	USA	892.8
													Joho Capital L.L.C.	Arcadium Lithium plc	214.04				Allianz Global Investors U.S. LLC	USA	889.601
													Invesco Capital Management LLC	Arcadium Lithium plc	213.185				Janus Henderson Group PLC	United Kingdom	884.198
													Dimensional Fund Advisors LP	Arcadium Lithium plc	210.635				Deutsche Asset & Wealth Management	USA	880.043
													Global X Management Co. LLC	Arcadium Lithium plc	210.398				UBS SDIC Fund Management Co. Ltd.	China	876.434
													Mirae Asset Global Investments Co. Ltd.	Arcadium Lithium plc	208.818				Voya Investment Management LLC	USA	874.574
													Northern Trust Global Investments	Arcadium Lithium plc	206.008				Goldman Sachs Asset Management LP	USA	870.681
													Geode Capital Management LLC	Arcadium Lithium plc	202.979				Schweizerische Nationalbank	Switzerland	855.116
													CIBC Pvt. Wealth Advisors Inc.	Arcadium Lithium plc	202.352				Susquehanna International Group LLP	USA	839.769
													LMCG Investments LLC	Arcadium Lithium plc	202.299				FMR LLC	USA	826.559
													Ruffer LLP	Arcadium Lithium plc	201.193				Mondrian Investment Partners Ltd.	United Kingdom	792.757
													Granite Investment Partners LLC	Arcadium Lithium plc	199.477				China Construction Bank Corp.	China	776.802
													Millennium Management LLC	Arcadium Lithium plc	198.998				Managed Account Advisors LLC	USA	766.623
													Axel Capital Management LLC	Arcadium Lithium plc	195.021				Stichting Pensioenfonds ABP	Netherlands	764.845
													Victory Capital Management Inc.	Arcadium Lithium plc	189.122				Nt-Comnwlth Super Corp	Australia	760.821
													Morgan Stanley	Arcadium Lithium plc	187.957				E Fund Management Co. Ltd.	China	753.489
													Handelsbanken Asset Management	Arcadium Lithium plc	187.563				Canada Pension Plan Investment Board	Canada	737.968
													Frontier Capital Management Co LLC	Arcadium Lithium plc	183.008				ETFS Management (AUS) Ltd.	Australia	707.238
													Franklin Resources Inc.	Arcadium Lithium plc	181.285				Meichun Sun	China	700.846
													Foord Asset Management Guernsey Ltd	Arcadium Lithium plc	180.525				Agricultural Bank of China Ltd.	China	696.185
													National Bank Trust Inc.	Arcadium Lithium plc	179.303				HSBC Jintrust Fund Management Co. Ltd.	China	684.274
													Royce & Associates LP	Arcadium Lithium plc	177.46				Fitpart Fund Administration Services Ltd.	Bahamas	682.04
													Charles Schwab Investment Management Inc.	Arcadium Lithium plc	174.338				American Century Investment Management Inc	USA	680.539
													First Trust Advisors LP	Arcadium Lithium plc	172.043				China Asset Management Co. Ltd.	China	669.315
													Principal Global Investors LLC	Arcadium Lithium plc	171.651				Orient Fund Management Co. Ltd.	China	668.15
													RobecoSAM AG	Arcadium Lithium plc	170.09				Barclays Bank PLC	United Kingdom	663.79
													Peregrine Capital Management LLC	Arcadium Lithium plc	169.375				LG Chem Ltd.	South Korea	663.225
													Citigroup Inc.	Arcadium Lithium plc	169.288				Minxi Xinghang State-owned Assets Investment Operation Co.Ltd.	China	657.171
													GO ETF Solutions LLP	Arcadium Lithium plc	168.388				DNB Asset Management AS	Norway	652.44
													American Beacon Advisors Inc.	Arcadium Lithium plc	168.04				Milford Asset Management LTD	New Zealand	644.528
													Amundi Asset Management SAS	Arcadium Lithium plc	167.644				Macquarie Investment Management Business Trust	USA	641.657
													Allianz Asset Management GmbH	Arcadium Lithium plc	166.512				Polygon Global Partners LLP	United Kingdom	639.619
													Van Eck Associates Corp.	Arcadium Lithium plc	166.254				GF Securities Asset Management Co.Ltd.	China	619.19
													Renaissance Technologies LLC	Arcadium Lithium plc	164.225				Hudson River Trading LLC	USA	605.372
													Mibra	AMG Critical Materials N.V.	163.337				Netwealth Investments Ltd.	Australia	605.241
													Heinz C. Schimmelbusch	AMG Critical Materials N.V.	160.87				Empower Advisory Group LLC	USA	589.3
													BNPP Asset Management Holding	AMG Critical Materials N.V.	160.62				Allspring Global Investments LLC	USA	584.358
													Invesco Ltd.	AMG Critical Materials N.V.	160.458				Toyota Industries Corp.	Japan	582.639
													DNB Asset Management AS	AMG Critical Materials N.V.	158				Wells Fargo & Co.	USA	578.171
													Vanguard Group Inc.	AMG Critical Materials N.V.	157.041				Truvalue Asset Management Co.,Ltd.	China	573.248
													GO ETF Solutions LLP	AMG Critical Materials N.V.	155.235				Handelsbanken Asset Management	Sweden	570.758
													Norges Bank Investment Management	AMG Critical Materials N.V.	154.259				Huatai-PineBridge Fund Management Co. Ltd.	China	569.065
													Van Eck Associates Corp.	AMG Critical Materials N.V.	154.093				Merrill Lynch Pierce Fenner & Smith Inc.	USA	561.952
													Salar de Olaroz	Allkem Ltd.	153.724				Nikko Asset Management Co. Ltd.	Japan	558.246
													Toyota Tsusho Corp.	Allkem Ltd.	153.26				Sichuan Yonghong Industrial Co., Ltd.	China	550.379
													Australian Super Pty Ltd	Allkem Ltd.	151.745				Electron Capital Partners LLC	USA	546.993
													Handelsbanken Asset Management	Allkem Ltd.	151.694				China Southern Asset Management Co. Ltd.	China	546.701
													L Capital Pty. Ltd.	Allkem Ltd.	151.576				Schroder Investment Management Ltd.	United Kingdom	525.242
													Vanguard Group Inc.	Allkem Ltd.	151.555				Heinz C. Schimmelbusch	Netherlands	511.072
													BNY Asset Management	Allkem Ltd.	150.764				Pacific Asset Management Co. Ltd.	China	487.777
													Norges Bank Investment Management	Allkem Ltd.	150.559				Fullgoal Fund Management Co. Ltd.	China	480.465
													Richard Phillip Seville	Allkem Ltd.	150.088				Xue Hua Chen	China	477.5
													Global X Management Co. LLC	Allkem Ltd.	149.842				Invesco Ltd.	USA	472.692
													Greenbushes	Albemarle Corp.	148.535				Jove Pty Ltd	Australia	470.615
													Atacama(Albemarle)	Albemarle Corp.	146.284				Mccusker Holdings Pty. Ltd.	Australia	466.824
													Silver Peak	Albemarle Corp.	144.742				China Cinda Asset Management Co. Ltd.	China	466.01
													Vanguard Group Inc.	Albemarle Corp.	144.478				Nomura Asset Management Co. Ltd.	Japan	463.65
													BlackRock Inc.	Albemarle Corp.	143.012				Nordea Investment Management AB	Sweden	457.847
													Franklin Resources Inc.	Albemarle Corp.	142.383				Royal Bank of Canada	Canada	450.043
													State Street Global Advisors Inc.	Albemarle Corp.	139.965				Itau USA Asset Management Inc.	USA	447.949
													PRIMECAP Management Co.	Albemarle Corp.	139.391				Frontier Capital Management Co LLC	USA	442.927
													Baillie Gifford & Co.	Albemarle Corp.	139.23				Leeward Investments LLC	USA	427.024
													FMR LLC	Albemarle Corp.	138.785				Credit Suisse Asset Management (Switzerland) Ltd.	Switzerland	420.505
													BNY Asset Management	Albemarle Corp.	137.999				D&C Geraghty Pty. Ltd.	Australia	420.421
													Putnam LLC	Albemarle Corp.	137.129				Shenzhen Chengtun Industrial Development Co. Ltd.	China	420.046
													Geode Capital Management LLC	Albemarle Corp.	136.717				Polar Capital Holdings PLC	United Kingdom	416.802
													Dimensional Fund Advisors LP	Albemarle Corp.	136.546				ZKB Asset Management	Switzerland	408.34
													Global X Management Co. LLC	Albemarle Corp.	136.157				China Universal Asset Management Co. Ltd.	China	402.179
													Mirae Asset Global Investments Co. Ltd.	Albemarle Corp.	135.813				Zuoping Zheng	China	393.211
													Northern Trust Global Investments	Albemarle Corp.	135.565				Nucleo Capital Ltda.	Brazil	374.172
													SPF Beheer BV	Albemarle Corp.	135.285				CPU Share Plans Pty Ltd.	Australia	370.653
													Aegon Asset Management UK Plc	Albemarle Corp.	134.189				China Merchants Securities Asset Management Co. Ltd.	China	370.389
													ProShare Advisors LLC	Albemarle Corp.	130.791				AllianceBernstein LP	USA	364.509
													Invesco Capital Management LLC	Albemarle Corp.	130.736				CIBC Pvt. Wealth Advisors Inc.	USA	359.838
													Norges Bank Investment Management	Albemarle Corp.	130.23				LarrainVial Asset Management Administradora General de Fondos SA	Chile	339.585
													Shapiro Capital Management LLC	Albemarle Corp.	130.223				Foord Asset Management Guernsey Ltd	United Kingdom	337.864
													Bank of America Corp.	Albemarle Corp.	128.055				Eastspring Investments (Singapore) Ltd.	Singapore	332.897
													Handelsbanken Asset Management	Albemarle Corp.	127.229				London Co. of Virginia LLC	USA	329.624
													First Trust Advisors LP	Albemarle Corp.	126.999				Allianz Asset Management GmbH	Germany	328.607
													Pictet Asset Management Ltd.	Albemarle Corp.	126.862				Banchile Administradora General de Fondos SA	Chile	327.761
													U.S. Bancorp Asset Management Inc.	Albemarle Corp.	126.604				Hangzhou Youyou Business Management Partnership Enterprise (L.P.)	China	324.817
													Canada Pension Plan Investment Board	Albemarle Corp.	126.393				ClearBridge Investments LLC	USA	323.051
													Charles Schwab Investment Management Inc.	Albemarle Corp.	125.82				Zijin Mining Group Co. Ltd.	China	321.945
													Legal & General Investment Management Ltd.	Albemarle Corp.	124.742				Fifthdelta Ltd.	United Kingdom	321.115
													Teachers Insurance and Annuity Association-College Retirement Equities Fund	Albemarle Corp.	124.256				Harvest Fund Management Co. Ltd.	China	317.953
													Scotia Asset Management LP	Albemarle Corp.	123.727				SPF Beheer BV	Netherlands	316.721
													Eagle Asset Management Inc.	Albemarle Corp.	123.498				Rosewill Bay Ltd.	Brazil	312.144
													UBS Asset Management AG	Albemarle Corp.	123.255				McCusker Charitable Foundation	Australia	310.526
													Ensign Peak Advisors Inc.	Albemarle Corp.	122.934				Goldman Sachs Group Inc.	USA	307.109
													EARNEST Partners LLC	Albemarle Corp.	122.671				Shanghai Guotai Junan Securities Asset Management Co. Ltd.	China	306.219
													Personal Capital Advisors Corp.	Albemarle Corp.	122.031				GIC Pte. Ltd.	Singapore	302.686
													Managed Account Advisors LLC	Albemarle Corp.	119.969				Wuhu Xinzeqing Investment Management Partnership (Limited Partnership)	China	291.515
													Mitsubishi UFJ Trust & Banking Corp.	Albemarle Corp.	119.795				Perth Select Seafoods Pty Ltd	Australia	280.44
													Eaton Vance Management	Albemarle Corp.	118.793				Citic Securities Co. Ltd.	China	278.097
													Schweizerische Nationalbank	Albemarle Corp.	118.423				Argo Investments Ltd.	Australia	275.6
													Nikko Asset Management Co. Ltd.	Albemarle Corp.	118.095				Russell Investment Management LLC	USA	273.51
													Wells Fargo & Co.	Albemarle Corp.	117.172				Pingwei Wang	China	266.896
													T. Rowe Price Group Inc.	Albemarle Corp.	117.098				Sichuan Yahua Industrial Group Co. Ltd.	China	266.686
													New York State Common Retirement Fund	Albemarle Corp.	117.046				Zurich Asset Management Administradora General De Fondos SA	Chile	255.659
													Mariner LLC	Albemarle Corp.	116.59				Calvyn Gardner	South Africa	249.716
													Stichting Pensioenfonds ABP	Albemarle Corp.	116.262				BCI Administradora de Fondos Mutuos SA	Chile	247.639
													Columbia Management Investment Advisers LLC	Albemarle Corp.	116.055				Jupiter Fund Management PLC	United Kingdom	247.471
													Avalon Advisors LLC	Albemarle Corp.	115.717				Itaú Unibanco Holding SA	Brazil	238.107
													American Century Investment Management Inc	Albemarle Corp.	115.651				Acuity Capital Investment Management Pty Ltd	Australia	230.895
													Allianz Asset Management GmbH	Albemarle Corp.	115.468				Baker Steel Capital Managers LLP	United Kingdom	226.308
													DJE Kapital AG	Albemarle Corp.	115.215				Mitsubishi UFJ Trust and Banking Corp.	Singapore	223.783
													Royal Bank of Canada	Albemarle Corp.	113.361				Empowered Funds LLC	USA	219.136
													Amundi Asset Management SAS	Albemarle Corp.	113.158				GWL Investment Management Ltd.	Canada	218.524
													Barclays PLC	Albemarle Corp.	112.702				Leendert Hoeksema	Australia	210.094
													Marathon Asset Management Ltd.	Albemarle Corp.	112.416				Santander Asset Management SA SGIIC	Spain	209.103
													Payden & Rygel	Albemarle Corp.	112.405				Haihua Zhong	China	208.895
													Morgan Stanley	Albemarle Corp.	112.317				First State Cinda Fund Management Co. Ltd.	China	207.889
													AGF Management Ltd.	Albemarle Corp.	112.264				ALPS Advisors Inc.	USA	205.397
													GE Asset Management Inc.	Albemarle Corp.	111.61				George Ring Ireland	USA	202.722
													Bikita	Zimbabwe	111.065				Beijing Lianzhong Peer Biotechnology Co. Ltd.	China	202.106
													Albemarle Corp.	USA	110.979				Todd Asset Management LLC	USA	201.837
													Silver Peak	USA	106.889				Shenzhen Jinhui Rongsheng Wealth Management Co. Ltd.	China	200.508
													Grupo Mota	Portugal	106.177				Rhumbline Advisers Ltd Partnership	USA	200.287
													Alvarroes	Portugal	105.591				Haibo Shen	China	198.509
													AMG Critical Materials N.V.	Netherlands	105.519				Greenwoods Asset Management Ltd.	China	197.1
													Toyota Tsusho Corp.	Japan	105.388				Luther King Capital Management Corp.	USA	195.195
													Arcadium Lithium plc	Ireland	105.338				HB Wealth Management LLC	USA	194.766
													Tianqi Lithium Corp.	China	105.16				BTG Pactual Global Asset Management Ltd.	Bermuda	189.491
													Ganfeng Lithium Group	China	104.931				ABC-CA Fund Management Co. Ltd.	China	188.535
													Qinghai Salt Lake Industry Co.,Ltd	China	104.838				Maven Securities Ltd.	United Kingdom	186.8
													Yichun Tantalum Co Ltd	China	104.731				Wanjia Asset Management Co. Ltd.	China	186.648
													Western Mining Group Co. Ltd.	China	104.632				California State Teachers' Retirement System	USA	185.011
													Youngy Invt Hldg Grp Co.Ltd.	China	102.974				Bosera Asset Management Co. Ltd.	China	181.086
													Sinomine Resource Grp Co Ltd	China	102.63				Appian Way Asset Management LP	USA	178.564
													Qinghai Hengxin Rongliye Technology Co.Ltd.	China	102.217				Société Générale SA	France	173.731
													Zangge Mining Company Limited	China	102.181				Compass Group LLC	USA	169.708
													Qinghai Technology development Co., LTD	China	101.361				Itaú Administradora General de Fondos SA	Chile	169.344
													Tibet Mineral Dev. Co. LTD	China	100.943				Vest Financial LLC	USA	169.246
													Chaerhan Lake	China	100.523				Larrainvial Administradora De Fondos S.A.	Chile	168.176
													Yichun	China	100.442				Zangge Mining Company Limited ESOP	China	166.873
													East Taijinair	China	100.396				BNP Paribas Financial Markets SNC	France	166.792
													Jiajika	China	99.794				Brett Laurence Lynch	Australia	161.475
													West Taijinai Lake	China	99.7477				BMO Asset Management Corp.	USA	160.698
													Qarhan Lake	China	87000				Driehaus Capital Management LLC	USA	160.431
													West Taijinair	China	72200				Paul Anthony Crawford	Australia	158.247
													Zhabuye	China	62156				Eric E. Jackson	Netherlands	157.974
													Jintaier Lake	China	40000				Caisse de dépôt et placement du Québec	Canada	157.944
													SQM	Chile	26834				Rosefinch Fund Management Co. Ltd.	China	157.896
													Atacama(SQM)	Chile	20539				Commonwealth Equity Services LLC	USA	156.371
													Atacama(Albemarle)	Chile	19801				ICBC Credit Suisse Asset Management Co. Ltd.	China	156.367
													Companhia Brasileira de Lítio	Brazil	15988				Xinjiang Tacheng International Resources Ltd.	China	156.037
													Mibra	Brazil	13502				Peter Barrett Capp	Australia	155.917
													Cachoeira	Brazil	11267				AXA Investment Managers SA	France	154.711
													Mineral Resources Ltd.	Australia	10000				Kenneth Edward Brinsden	Australia	154.297
													Pilbara Minerals Ltd.	Australia	9787				Hermes Investment Management Ltd.	United Kingdom	153.545
													Morella Corp.	Australia	9454				Grandfield & Dodd LLC	USA	151.839
													Galaxy Resources Ltd.	Australia	8309				Mariner LLC	USA	151.252
													Allkem Ltd.	Australia	8059				Ping An UOB Fund Management Co. Ltd.	China	151.228
													Greenbushes	Australia	6677				California Public Employees' Retirement System	USA	148.22
													Mount Marion	Australia	5000				Guotai Asset Mgmt Co. Ltd.	China	145.497
													Pilgangoora	Australia	4430				Moneda Administradora de Fondos de Invers	Chile	142.158
													Altura	Australia	2976				HSBC Global Asset Management (UK) Ltd.	United Kingdom	140.567
													Mt Cattlin	Australia	2613				National Pension Service	South Korea	140.173
													Jujuy Energia y Mineria	Argentina	2210				Zhejiang Hongyue Private Fund Management Co. Ltd.	China	139.744
													Salar del Hombre Muerto	Argentina	1000				Capital Advisors Inc.	USA	139.288
													Salar de Olaroz	Argentina	618				Envestnet Asset Management Inc.	USA	138.844
																			Administradora General de Fondos Security SA	Chile	138.767
																			Mitsubishi UFJ Asset Management Co. Ltd.	Japan	137.656
																			Liontrust Asset Management PLC	United Kingdom	137.199
																			Davenport & Co. LLC	USA	135.035
																			Tredje AP-fonden	Sweden	132.751
																			Royal London Asset Management Ltd.	United Kingdom	130.97
																			John Anthony Kanellitsas	Canada	130.336
																			Huashang Fund Management Co. Ltd.	China	128.489
																			BICE Inversiones Administradora General de Fondos SA	Chile	128.202
																			Boston Common Asset Management LLC	USA	126.838
																			Damask Inc.	Brazil	125.607
																			Border To Coast Pensions Partnership Ltd.	United Kingdom	125.283
																			Twin Tree Management LP	USA	124.877
																			Teachers' Retirement System of the State of Kentucky	USA	123.834
																			Australian Foundation Investment Co. Ltd.	Australia	122.909
																			Franklin Templeton Sealand Fund Management Co. Ltd.	China	121.424
																			MUFG Bank Ltd.	Japan	119.867
																			New York State Teachers' Retirement System	USA	117.832
																			NS Partners Ltd	United Kingdom	117.457
																			New York State Common Retirement Fund	USA	117.108
																			Walleye Capital LLC	USA	116.134
																			RBC Global Asset Management Inc.	Canada	114.852
																			Jinzhi Jiang	China	114.628
																			Gold Fields Ltd.	South Africa	113.955
																			BYD Company Ltd.	China	113.119
																			Hardman Johnston Global Advisors LLC	USA	112.203
																			Korea Investment Corp.	South Korea	112.085
																			Cesar Chicayban	Brazil	111.123
																			State Board of Administration of Florida	USA	109.688
																			INTECH Investment Management LLC	USA	109.271
																			Franco Mignacco	Canada	108.573
																			Danielle Sharon Tudehope	Australia	107.943
																			D.E. Shaw & Co. LP	USA	107.824
																			Mitsubishi UFJ Trust and Banking Corp.	Japan	107.712
																			Daiwa Asset Management Co. Ltd.	Japan	107.431
																			STRS Ohio	USA	107.15
																			Samlyn Capital LLC	USA	106.498
																			Group One Trading L.P.	USA	104.696
																			Allan Charles Buckler	Australia	103.985
																			BTG Pactual Serviços Financeiros S.A. Distribuidora de Títulos e Valores Mobiliá	Brazil	102.168
																			Ossiam	France	101.576
																			PGGM	Netherlands	101.208
																			Adage Capital Management LP	USA	100.885
																			AQR Capital Management LLC	USA	100.357
																			Bridgewater Associates LP	USA	99.7255
																			Inversiones SQYA S.A	Atacama(SQM)	41275.7
																			Tianqi Lithium Corp.	Atacama(SQM)	36683.8
																			Vanguard Group Inc.	Greenbushes	14657.7
																			Chengdu Tianqi Industry Group Co. Ltd.	Greenbushes	14000.4
																			Jiangxi Tungsten Holding Group Co., LTD	Yichun	13975
																			BlackRock Inc.	Greenbushes	12724.9
																			China Firms	East Taijinair	11942
																			Capital Research and Management Co.	Greenbushes	11523.6
																			State Street Global Advisors Inc.	Pilgangoora	8949.33
																			State Street Global Advisors Inc.	Greenbushes	8317.81
																			China Firms	Jiajika	8088
																			State Street Global Advisors Inc.	Atacama(SQM)	6554.4
																			BlackRock Inc.	Atacama(SQM)	6125.51
																			A0 Investimentos Ltda.	Grota do Cirilo	6020.37
																			Vanguard Group Inc.	Atacama(Albemarle)	6000
																			BlackRock Inc.	Pilgangoora	5698.28
																			Capital Research and Management Co.	Atacama(Albemarle)	5546.62
																			Vanguard Group Inc.	Wodgina	5417.52
																			Ganfeng Lithium Group Co. Ltd.	Pilgangoora	5177.81
																			JPMorgan Chase & Co.	Pilgangoora	5131.52
																			BlackRock Inc.	Wodgina	5098.95
																			Liangbin Li	Mount Marion	5056.36
																			China Firms	West Taijinai Lake	5000
																			Zhongxin Guoan	West Taijinair	5000
																			China Firms	Qinghai Yiliping	4821.54
																			Yandal Investments Pty. Ltd..	Greenbushes	4704.59
																			Fidelity International Ltd.	Greenbushes	4630.35
																			Australian Super Pty Ltd	Pilgangoora	4598.4
																			Franklin Resources Inc.	Greenbushes	4581.03
																			Vanguard Group Inc.	Pilgangoora	4450.67
																			BlackRock Inc.	Atacama(Albemarle)	4340.14
																			Administradora de Fondos de Pensiones Habitat SA	Atacama(SQM)	3947.03
																			Christopher James Ellison	Wodgina	3909.33
																			BlackRock Inc.	Salar del Hombre Muerto	3868.77
																			Administradora de Fondos de Pensiones Cuprum SA	Atacama(SQM)	3786.9
																			Capital Research and Management Co.	Wodgina	3748.24
																			BlackRock Inc.	Mt Cattlin	3732.09
																			Citigroup Inc.	Pilgangoora	3703.64
																			State Street Global Advisors Inc.	Wodgina	3668.88
																			Vanguard Group Inc.	Salar del Hombre Muerto	3648.41
																			Norges Bank Investment Management	Greenbushes	3641.56
																			Qinghai State-owned Assets Investment and Management Co. Ltd.	Chaerhan Lake	3622.64
																			Vanguard Group Inc.	Mt Cattlin	3519.52
																			Administradora de Fondos de Pensiones Capital SA	Atacama(SQM)	3275.77
																			State Street Global Advisors Inc.	Altura	3245.53
																			Vanguard Group Inc.	Atacama(SQM)	3190.47
																			PRIMECAP Management Co.	Greenbushes	3077.27
																			AFP Provida SA	Atacama(SQM)	3049.99
																			China Nonferrous Metal Mining (Group) Co. Ltd.	Bikita	3038.89
																			Christopher James Ellison	Mount Marion	2975.69
																			Tibet Zangge Venture Capital Group Co. Ltd.	Qarhan Lake	2762.4
																			Geode Capital Management LLC	Greenbushes	2690.36
																			Inversiones SQYA S.A	Mt Holland - Lithium	2543.88
																			T. Rowe Price Group Inc.	Greenbushes	2529.78
																			Posco Holdings Inc.	Pilgangoora	2460.65
																			Kowa Company Ltd.	Atacama(SQM)	2460.59
																			Global X Management Co. LLC	Greenbushes	2445.75
																			State Street Global Advisors Inc.	Atacama(Albemarle)	2385.22
																			ICBC Financial Asset Investment Co. Ltd.	Chaerhan Lake	2334.15
																			Weiping Jiang	Greenbushes	2309.64
																			Wellington Management Group LLP	Salar del Hombre Muerto	2287.31
																			Tianqi Lithium Corp.	Mt Holland - Lithium	2260.87
																			Brazil Firms	Cachoeira	2210
																			Wellington Management Group LLP	Mt Cattlin	2206.5
																			Franklin Resources Inc.	Atacama(Albemarle)	2204.96
																			BlackRock Inc.	Mount Marion	2147.6
																			Baillie Gifford & Co.	Greenbushes	2085.23
																			Ningbo Meishan Bondedn Port Area Xinsha Hongyun Investment Management Co. Ltd.	Qarhan Lake	2077.38
																			BlackRock Inc.	Altura	2066.52
																			China Development Bank	Chaerhan Lake	2026.63
																			Norges Bank Investment Management	Wodgina	1918.04
																			Ganfeng Lithium Group Co. Ltd.	Altura	1877.76
																			abrdn PLC	Atacama(SQM)	1864.89
																			JPMorgan Chase & Co.	Altura	1860.97
																			Morgan Stanley	Greenbushes	1815.34
																			Xiaoshen Wang	Mount Marion	1811.55
																			First Sentier Investors (Australia) IM Ltd	Greenbushes	1809.01
																			Sinochem Holdings Corporation Ltd.	Chaerhan Lake	1788.03
																			T. Rowe Price Group Inc.	Pilgangoora	1772.28
																			Argentina Firms	Salar de Olaroz	1771.06
																			Millennium Management LLC	Salar del Hombre Muerto	1731.14
																			Millennium Management LLC	Mt Cattlin	1669.98
																			Australian Super Pty Ltd	Altura	1667.64
																			Dimensional Fund Advisors LP	Greenbushes	1667.57
																			Vanguard Group Inc.	Altura	1614.06
																			State Street Global Advisors Inc.	Mount Marion	1565.76
																			Shaanxi Coal and Chemical Industry Group Co.Ltd.	Chaerhan Lake	1529.48
																			Franklin Resources Inc.	Wodgina	1490.05
																			PRIMECAP Management Co.	Atacama(Albemarle)	1481.17
																			Bank of China Co. Ltd. Qinghai Branch	Chaerhan Lake	1436.21
																			Norges Bank Investment Management	Atacama(SQM)	1401.07
																			Invesco Capital Management LLC	Greenbushes	1389.86
																			Mirae Asset Global Investments Co. Ltd.	Greenbushes	1377.19
																			BNY Asset Management	Greenbushes	1372.74
																			Citigroup Inc.	Altura	1343.15
																			Vanguard Group Inc.	Mount Marion	1298.43
																			Amundi Asset Management SAS	Greenbushes	1269.27
																			Lazard Asset Management LLC	Atacama(SQM)	1250.74
																			Portugal Firms	Alvarroes	1236
																			Grantham Mayo Van Otterloo & Co. LLC	Atacama(SQM)	1226.27
																			Yong Ming Xiao	Qarhan Lake	1189.06
																			Postal Savings Bank Of China Co. Ltd. Qinghai Branch	Chaerhan Lake	1185.56
																			Toyota Motor Corp.	Salar de Olaroz	1177.75
																			Mirae Asset Global Investments Co. Ltd.	Atacama(SQM)	1166.04
																			Global X Management Co. LLC	Pilgangoora	1158.49
																			Capital Research and Management Co.	Salar del Hombre Muerto	1156.92
																			Van Eck Associates Corp.	Salar del Hombre Muerto	1154.62
																			Piedmont Lithium Inc.	North American Lithium	1154.3
																			China Firms	Sal de los Angeles	1150
																			State Street Global Advisors Inc.	Salar del Hombre Muerto	1147.88
																			Zhejiang Huayou Holding Group Co., Ltd.	Arcadia	1129.93
																			Geode Capital Management LLC	Atacama(Albemarle)	1118.65
																			Capital Research and Management Co.	Mt Cattlin	1116.05
																			Van Eck Associates Corp.	Mt Cattlin	1113.83
																			Norges Bank Investment Management	Atacama(Albemarle)	1112.67
																			Global X Management Co. LLC	Atacama(SQM)	1110.59
																			State Street Global Advisors Inc.	Mt Cattlin	1107.32
																			Northern Trust Global Investments	Greenbushes	1061.33
																			Grantham Mayo Van Otterloo & Co. LLC	Salar del Hombre Muerto	1055.03
																			BNP Paribas Securities Corp.	Greenbushes	1054.66
																			Columbia Management Investment Advisers LLC	Salar del Hombre Muerto	1039.47
																			ProShare Advisors LLC	Greenbushes	1025.49
																			Grantham Mayo Van Otterloo & Co. LLC	Mt Cattlin	1017.76
																			Norges Bank Investment Management	Mount Marion	1012.48
																			Baillie Gifford & Co.	Atacama(Albemarle)	1003.67
																			Columbia Management Investment Advisers LLC	Mt Cattlin	1002.75
																			PRIMECAP Management Co.	Wodgina	1000.93
																			China Firms	Jintaier Lake	1000
																			BlackRock Inc.	Mt Holland - Lithium	992.584
																			Tibet Mining Asset Operation Co. Ltd.	Zhabuye	983.04
																			Geode Capital Management LLC	Wodgina	949.185
																			Van Eck Associates Corp.	Pilgangoora	944.492
																			Fraserx PTY Ltd.	Greenbushes	940.537
																			China Securities Finance Corporation Ltd.	Greenbushes	936.691
																			General Motors Co.	Pastos Grandes	934
																			Bank of America Corp.	Greenbushes	928.469
																			Global X Management Co. LLC	Salar del Hombre Muerto	927.199
																			State Street Global Advisors Inc.	Mt Holland - Lithium	913.625
																			Liangbin Li	Qinghai Yiliping	910.742
																			Pictet Asset Management Ltd.	Greenbushes	905.633
																			RobecoSAM AG	Greenbushes	903.251
																			Global X Management Co. LLC	Mt Cattlin	894.442
																			Posco Holdings Inc.	Altura	892.368
																			EARNEST Partners LLC	Greenbushes	854.532
																			Toyota Tsusho Corp.	Salar de Olaroz	849.369
																			Vanguard Group Inc.	Mt Holland - Lithium	808.075
																			Global X Management Co. LLC	Wodgina	805.561
																			Mondrian Investment Partners Ltd.	Atacama(SQM)	792.757
																			UBS Asset Management AG	Greenbushes	790.901
																			Legal & General Investment Management Ltd.	Greenbushes	780.738
																			State Street Global Advisors Inc.	North American Lithium	779.502
																			Jane Street Group LLC	Salar del Hombre Muerto	779.102
																			China Construction Bank Corp.	Chaerhan Lake	776.802
																			BNPP Asset Management Holding	Greenbushes	770.533
																			Jane Street Group LLC	Mt Cattlin	751.577
																			Charles Schwab Investment Management Inc.	Greenbushes	724.493
																			Perpetual Ltd.	Greenbushes	708.405
																			Van Eck Associates Corp.	Greenbushes	699.822
																			Agricultural Bank of China Ltd.	Chaerhan Lake	696.185
																			U.S. Bancorp Asset Management Inc.	Greenbushes	691.445
																			Fitpart Fund Administration Services Ltd.	Grota do Cirilo	682.04
																			Baillie Gifford & Co.	Wodgina	678.251
																			Invesco Capital Management LLC	Atacama(Albemarle)	668.975
																			BlackRock Inc.	Grota do Cirilo	667.831
																			Mirae Asset Global Investments Co. Ltd.	Atacama(Albemarle)	662.876
																			RobecoSAM AG	Atacama(SQM)	660.977
																			BNY Asset Management	Atacama(Albemarle)	660.732
																			State Street Global Advisors Inc.	Salar de Olaroz	660.012
																			Dimensional Fund Advisors LP	Salar del Hombre Muerto	653.391
																			Geode Capital Management LLC	Pilgangoora	653.204
																			Global X Management Co. LLC	Atacama(Albemarle)	651.572
																			Legal & General Investment Management Ltd.	Salar del Hombre Muerto	647.344
																			T. Rowe Price Group Inc.	Altura	642.728
																			Macquarie Investment Management Business Trust	Atacama(SQM)	641.657
																			CI Global Asset Management	Atacama(SQM)	636.406
																			Dimensional Fund Advisors LP	Mt Cattlin	630.307
																			Legal & General Investment Management Ltd.	Mt Cattlin	624.474
																			Shapiro Capital Management LLC	Salar del Hombre Muerto	618.014
																			Geode Capital Management LLC	Salar del Hombre Muerto	610.294
																			First Trust Advisors LP	Greenbushes	606.767
																			Vanguard Group Inc.	Silver Peak	600
																			Shapiro Capital Management LLC	Mt Cattlin	596.18
																			Meichun Sun	Bikita	589.898
																			Geode Capital Management LLC	Mt Cattlin	588.733
																			Allspring Global Investments LLC	Atacama(SQM)	584.358
																			Toyota Industries Corp.	Salar de Olaroz	582.639
																			Norges Bank Investment Management	Pilgangoora	582.403
																			Mirae Asset Global Investments Co. Ltd.	Salar del Hombre Muerto	575.565
																			China Nonferrous Metal Mining (Group) Co. Ltd.	Tanco	571.558
																			Dimensional Fund Advisors LP	Atacama(Albemarle)	570.793
																			Dimensional Fund Advisors LP	Wodgina	568.622
																			Mirae Asset Global Investments Co. Ltd.	Mt Cattlin	555.231
																			Capital Research and Management Co.	Silver Peak	554.662
																			BetaShares Capital Ltd.	Pilgangoora	552.195
																			Liangbin Li	Cauchari-Olaroz	550.401
																			Sichuan Yonghong Industrial Co., Ltd.	Qarhan Lake	550.379
																			Amundi Asset Management SAS	Atacama(SQM)	549.517
																			EARNEST Partners LLC	Atacama(SQM)	540.395
																			T. Rowe Price Group Inc.	Atacama(SQM)	531.671
																			Eaton Vance Management	Greenbushes	529.635
																			Amundi Asset Management SAS	Salar del Hombre Muerto	528.904
																			BNY Asset Management	Salar del Hombre Muerto	526.346
																			Milford Asset Management LTD	Greenbushes	525.435
																			Coatue Management LLC	Greenbushes	523.639
																			Vanguard Group Inc.	North American Lithium	520.197
																			Citadel Advisors LLC	Greenbushes	513.685
																			Heinz C. Schimmelbusch	Mibra	511.072
																			Northern Trust Global Investments	Atacama(Albemarle)	510.843
																			Amundi Asset Management SAS	Mt Cattlin	510.219
																			Argentina Firms	Cauchari-Olaroz	510
																			BNY Asset Management	Mt Cattlin	507.751
																			Geode Capital Management LLC	Atacama(SQM)	501.47
																			ProShare Advisors LLC	Atacama(Albemarle)	493.591
																			Allianz Global Investors U.S. LLC	Greenbushes	492.42
																			JP Morgan Asset Management	Pilgangoora	492.222
																			GF Securities Asset Management Co.Ltd.	Bikita	491.164
																			Pacific Asset Management Co. Ltd.	Greenbushes	487.777
																			HSBC Jintrust Fund Management Co. Ltd.	Greenbushes	484.188
																			LG Chem Ltd.	Greenbushes	482.921
																			Teachers Insurance and Annuity Association-College Retirement Equities Fund	Greenbushes	479.397
																			Janus Henderson Group PLC	Greenbushes	477.824
																			Vanguard Group Inc.	Mibra	477.524
																			Xue Hua Chen	Arcadia	477.5
																			Norges Bank Investment Management	Mibra	473.822
																			China Cinda Asset Management Co. Ltd.	Chaerhan Lake	466.01
																			Northern Trust Global Investments	Wodgina	465.573
																			Teachers Insurance and Annuity Association-College Retirement Equities Fund	Wodgina	463.704
																			E Fund Management Co. Ltd.	Mount Marion	461.218
																			Global X Management Co. LLC	Mount Marion	460.17
																			FMR LLC	Greenbushes	457.524
																			Invesco Capital Management LLC	Wodgina	452.073
																			Mirae Asset Global Investments Co. Ltd.	Wodgina	447.951
																			Itau USA Asset Management Inc.	Atacama(SQM)	447.949
																			Bank of America Corp.	Atacama(Albemarle)	446.895
																			BNY Asset Management	Wodgina	446.503
																			Amundi Asset Management SAS	Atacama(Albemarle)	444.021
																			Minxi Xinghang State-owned Assets Investment Operation Co.Ltd.	Xiangyuan	443.358
																			Pictet Asset Management Ltd.	Atacama(Albemarle)	435.903
																			RobecoSAM AG	Atacama(Albemarle)	434.757
																			BlackRock Inc.	Silver Peak	434.014
																			Managed Account Advisors LLC	Greenbushes	424.348
																			Stichting Pensioenfonds ABP	Greenbushes	423.364
																			Goldman Sachs Asset Management LP	Greenbushes	423.254
																			Global X Management Co. LLC	Altura	420.133
																			Shenzhen Chengtun Industrial Development Co. Ltd.	Sabi Star	420.046
																			JPMorgan Chase & Co.	Finniss	418.659
																			EARNEST Partners LLC	Atacama(Albemarle)	411.307
																			Amundi Asset Management SAS	Wodgina	410.931
																			State Street Global Advisors Inc.	Finniss	408.561
																			Canada Pension Plan Investment Board	Greenbushes	408.487
																			Nt-Comnwlth Super Corp	Greenbushes	405.589
																			Legal & General Investment Management Ltd.	Pilgangoora	404.039
																			Legal & General Investment Management Ltd.	Wodgina	397.5
																			Australian Super Pty Ltd	Mt Holland - Lithium	396.909
																			Principal Global Investors LLC	Salar del Hombre Muerto	396.502
																			Vanguard Group Inc.	Salar de Olaroz	396.123
																			Zuoping Zheng	Qarhan Lake	393.211
																			Morgan Stanley	Atacama(Albemarle)	390.788
																			Colonial First State Investments Ltd.	Greenbushes	389.388
																			Van Eck Associates Corp.	Atacama(SQM)	385.731
																			Principal Global Investors LLC	Mt Cattlin	382.494
																			JPMorgan Chase & Co.	Greenbushes	378.726
																			Legal & General Investment Management Ltd.	Atacama(Albemarle)	375.789
																			Nucleo Capital Ltda.	Grota do Cirilo	374.172
																			BlackRock Inc.	North American Lithium	371.111
																			Barclays Bank PLC	Greenbushes	367.427
																			SEI Investments Co.	Greenbushes	367.016
																			Columbia Management Investment Advisers LLC	Greenbushes	364.232
																			Orient Fund Management Co. Ltd.	Greenbushes	362.583
																			Baillie Gifford & Co.	Mount Marion	361.291
																			Dimensional Fund Advisors LP	Pilgangoora	359.775
																			BlackRock Inc.	Mibra	355.711
																			Northern Trust Global Investments	Pilgangoora	354.529
																			Polygon Global Partners LLP	Greenbushes	354.048
																			Northern Trust Global Investments	Salar del Hombre Muerto	347.436
																			American Century Investment Management Inc	Salar del Hombre Muerto	346.388
																			Voya Investment Management LLC	Greenbushes	345.337
																			Van Eck Associates Corp.	Altura	342.526
																			Perpetual Ltd.	Atacama(Albemarle)	340.973
																			BNPP Asset Management Holding	Salar del Hombre Muerto	339.718
																			LarrainVial Asset Management Administradora General de Fondos SA	Atacama(SQM)	339.585
																			Northern Trust Global Investments	Mt Cattlin	335.161
																			American Century Investment Management Inc	Mt Cattlin	334.151
																			Vanguard Group Inc.	Finniss	333.675
																			ProShare Advisors LLC	Wodgina	333.554
																			Eastspring Investments (Singapore) Ltd.	Atacama(SQM)	332.897
																			U.S. Bancorp Asset Management Inc.	Atacama(Albemarle)	332.809
																			Banchile Administradora General de Fondos SA	Atacama(SQM)	327.761
																			BNPP Asset Management Holding	Mt Cattlin	327.716
																			China Southern Asset Management Co. Ltd.	Greenbushes	326.96
																			Xiaoshen Wang	Qinghai Yiliping	326.293
																			Empower Advisory Group LLC	Greenbushes	326.195
																			Hangzhou Youyou Business Management Partnership Enterprise (L.P.)	Arcadia	324.817
																			Schweizerische Nationalbank	Greenbushes	324.756
																			Deutsche Asset & Wealth Management	Greenbushes	322.253
																			Zijin Mining Group Co. Ltd.	Greenbushes	321.945
																			Fifthdelta Ltd.	Pastos Grandes	321.115
																			Wells Fargo & Co.	Greenbushes	320.034
																			JP Morgan Asset Management	Greenbushes	319.017
																			Morgan Stanley	Salar del Hombre Muerto	317.552
																			Handelsbanken Asset Management	Greenbushes	315.931
																			Rosewill Bay Ltd.	Grota do Cirilo	312.144
																			Hudson River Trading LLC	Salar del Hombre Muerto	308.129
																			Amundi Asset Management SAS	Pilgangoora	306.382
																			Morgan Stanley	Mt Cattlin	306.333
																			Shanghai Guotai Junan Securities Asset Management Co. Ltd.	Bikita	306.219
																			Northern Trust Global Investments	Atacama(SQM)	306.147
																			Orient Fund Management Co. Ltd.	Bikita	305.567
																			UBS Asset Management AG	Atacama(SQM)	305.368
																			Chengdu Tianqi Industry Group Co. Ltd.	Zhabuye	304.68
																			Wellington Management Group LLP	Greenbushes	304.642
																			Royal Bank of Canada	Greenbushes	303.811
																			Nikko Asset Management Co. Ltd.	Greenbushes	302.816
																			GIC Pte. Ltd.	Mount Marion	302.686
																			Bank of America Corp.	Wodgina	301.998
																			UBS SDIC Fund Management Co. Ltd.	Bikita	298.841
																			Hudson River Trading LLC	Mt Cattlin	297.243
																			UBS Asset Management AG	Atacama(Albemarle)	295.618
																			Pictet Asset Management Ltd.	Wodgina	294.57
																			RobecoSAM AG	Wodgina	293.796
																			Barclays PLC	Greenbushes	293.26
																			Citadel Advisors LLC	Atacama(SQM)	292.707
																			Dimensional Fund Advisors LP	Atacama(SQM)	292.285
																			Charles Schwab Investment Management Inc.	Atacama(Albemarle)	292.134
																			First Trust Advisors LP	Atacama(Albemarle)	292.052
																			Wuhu Xinzeqing Investment Management Partnership (Limited Partnership)	Chaerhan Lake	291.515
																			Norges Bank Investment Management	Salar de Olaroz	289.93
																			Colonial First State Investments Ltd.	Wodgina	289.455
																			Jane Street Group LLC	Greenbushes	289.23
																			BNY Asset Management	Pilgangoora	285.054
																			BNPP Asset Management Holding	Atacama(Albemarle)	282.226
																			Frontier Capital Management Co LLC	Grota do Cirilo	281.956
																			Perth Select Seafoods Pty Ltd	Greenbushes	280.44
																			DNB Asset Management AS	Salar del Hombre Muerto	280.159
																			EARNEST Partners LLC	Wodgina	277.949
																			UBS SDIC Fund Management Co. Ltd.	Greenbushes	277.674
																			Nomura Asset Management Co. Ltd.	Salar de Olaroz	277.421
																			ETFS Management (AUS) Ltd.	Salar del Hombre Muerto	276.551
																			Electron Capital Partners LLC	Grota do Cirilo	276.023
																			ZKB Asset Management	Greenbushes	275.659
																			Argo Investments Ltd.	Greenbushes	275.6
																			Toyota Tsusho Corp.	Sal de Vida	274.501
																			Citigroup Inc.	Greenbushes	274.487
																			Electron Capital Partners LLC	Atacama(SQM)	270.971
																			DNB Asset Management AS	Mt Cattlin	270.261
																			Teachers Insurance and Annuity Association-College Retirement Equities Fund	Mount Marion	269.283
																			Jove Pty Ltd	Wodgina	267.216
																			Pingwei Wang	Bikita	266.896
																			ETFS Management (AUS) Ltd.	Mt Cattlin	266.781
																			Sichuan Yahua Industrial Group Co. Ltd.	Finniss	266.686
																			Mccusker Holdings Pty. Ltd.	Wodgina	265.063
																			Morgan Stanley	Wodgina	264.083
																			Teachers Insurance and Annuity Association-College Retirement Equities Fund	Pilgangoora	262.153
																			Charles Schwab Investment Management Inc.	Salar del Hombre Muerto	259.625
																			Huatai-PineBridge Fund Management Co. Ltd.	Greenbushes	257.756
																			Susquehanna International Group LLP	Greenbushes	256.082
																			Zurich Asset Management Administradora General De Fondos SA	Atacama(SQM)	255.659
																			Eaton Vance Management	Atacama(Albemarle)	254.926
																			Barclays PLC	Salar del Hombre Muerto	254.02
																			Nordea Investment Management AB	Atacama(SQM)	253.994
																			Coatue Management LLC	Atacama(Albemarle)	252.041
																			General Motors Co.	Cauchari-Olaroz	251.283
																			Charles Schwab Investment Management Inc.	Mt Cattlin	250.452
																			Calvyn Gardner	Grota do Cirilo	249.716
																			BCI Administradora de Fondos Mutuos SA	Atacama(SQM)	247.639
																			Fullgoal Fund Management Co. Ltd.	Bikita	247.58
																			Citadel Advisors LLC	Atacama(Albemarle)	247.249
																			Schroder Investment Management Ltd.	Greenbushes	246.517
																			Barclays PLC	Mt Cattlin	245.046
																			China Merchants Securities Asset Management Co. Ltd.	Bikita	243.869
																			Administradora de Fondos de Pensiones Habitat SA	Mt Holland - Lithium	243.261
																			Invesco Ltd.	Greenbushes	242.596
																			China Universal Asset Management Co. Ltd.	Greenbushes	240.721
																			D&C Geraghty Pty. Ltd.	Wodgina	238.716
																			State Street Global Advisors Inc.	Silver Peak	238.522
																			Itaú Unibanco Holding SA	Atacama(SQM)	238.107
																			Allianz Global Investors U.S. LLC	Atacama(Albemarle)	237.014
																			Geode Capital Management LLC	Altura	236.888
																			Janus Henderson Group PLC	Pilgangoora	236.602
																			Susquehanna International Group LLP	Salar del Hombre Muerto	234.354
																			Administradora de Fondos de Pensiones Cuprum SA	Mt Holland - Lithium	233.392
																			Fullgoal Fund Management Co. Ltd.	Greenbushes	232.885
																			Acuity Capital Investment Management Pty Ltd	North American Lithium	230.895
																			Bank of America Corp.	Atacama(SQM)	230.707
																			Perpetual Ltd.	Wodgina	230.419
																			SEI Investments Co.	Atacama(SQM)	229.753
																			China Asset Management Co. Ltd.	Greenbushes	229.428
																			AFP Provida SA	Greenbushes	229.266
																			Susquehanna International Group LLP	Mt Cattlin	226.075
																			U.S. Bancorp Asset Management Inc.	Wodgina	224.903
																			Mitsubishi UFJ Trust and Banking Corp.	Greenbushes	223.783
																			Bank of America Corp.	Salar del Hombre Muerto	223.575
																			London Co. of Virginia LLC	Greenbushes	222.52
																			Millennium Management LLC	Atacama(SQM)	221.644
																			Franklin Resources Inc.	Silver Peak	220.496
																			Vanguard Group Inc.	Pastos Grandes	220.334
																			Colonial First State Investments Ltd.	Mount Marion	220.326
																			FMR LLC	Atacama(Albemarle)	220.218
																			China Southern Asset Management Co. Ltd.	Bikita	219.741
																			Empowered Funds LLC	Atacama(SQM)	219.136
																			Legal & General Investment Management Ltd.	Mibra	218.783
																			Leeward Investments LLC	Salar del Hombre Muerto	217.351
																			Bank of America Corp.	Mt Cattlin	215.677
																			Minxi Xinghang State-owned Assets Investment Operation Co.Ltd.	Lakkor Tso Salt Lake	213.814
																			SPF Beheer BV	Greenbushes	213.809
																			State Street Global Advisors Inc.	Sal de Vida	213.305
																			Merrill Lynch Pierce Fenner & Smith Inc.	Salar del Hombre Muerto	213.135
																			Polar Capital Holdings PLC	Salar del Hombre Muerto	212.148
																			Norges Bank Investment Management	Altura	211.212
																			CPU Share Plans Pty Ltd.	Wodgina	210.458
																			Leendert Hoeksema	Finniss	210.094
																			Leeward Investments LLC	Mt Cattlin	209.673
																			Santander Asset Management SA SGIIC	Atacama(SQM)	209.103
																			Haihua Zhong	Bikita	208.895
																			First State Cinda Fund Management Co. Ltd.	Bikita	207.889
																			Merrill Lynch Pierce Fenner & Smith Inc.	Mt Cattlin	205.606
																			Goldman Sachs Group Inc.	Mibra	205.337
																			Polar Capital Holdings PLC	Mt Cattlin	204.653
																			AllianceBernstein LP	Atacama(SQM)	204.403
																			Managed Account Advisors LLC	Atacama(Albemarle)	204.249
																			Stichting Pensioenfonds ABP	Atacama(Albemarle)	203.776
																			Goldman Sachs Asset Management LP	Atacama(Albemarle)	203.723
																			Jove Pty Ltd	Mount Marion	203.399
																			George Ring Ireland	Pastos Grandes	202.722
																			Beijing Lianzhong Peer Biotechnology Co. Ltd.	Qarhan Lake	202.106
																			Administradora de Fondos de Pensiones Capital SA	Mt Holland - Lithium	201.89
																			Todd Asset Management LLC	Atacama(SQM)	201.837
																			Mccusker Holdings Pty. Ltd.	Mount Marion	201.76
																			Nt-Comnwlth Super Corp	Wodgina	201.701
																			Shenzhen Jinhui Rongsheng Wealth Management Co. Ltd.	Mount Marion	200.508
																			Rhumbline Advisers Ltd Partnership	Greenbushes	200.287
																			BetaShares Capital Ltd.	Altura	200.257
																			HSBC Jintrust Fund Management Co. Ltd.	Mount Marion	200.087
																			UBS Asset Management AG	Wodgina	199.77
																			Dimensional Fund Advisors LP	Mibra	199.568
																			Haibo Shen	Mount Marion	198.509
																			Van Eck Associates Corp.	Mibra	198.164
																			Charles Schwab Investment Management Inc.	Pilgangoora	197.617
																			Netwealth Investments Ltd.	Wodgina	197.576
																			Charles Schwab Investment Management Inc.	Wodgina	197.415
																			First Trust Advisors LP	Wodgina	197.36
																			Xiaoshen Wang	Cauchari-Olaroz	197.193
																			Greenwoods Asset Management Ltd.	Greenbushes	197.1
																			Canada Pension Plan Investment Board	Atacama(Albemarle)	196.615
																			China Asset Management Co. Ltd.	Arcadia	195.904
																			Luther King Capital Management Corp.	Greenbushes	195.195
																			HB Wealth Management LLC	Greenbushes	194.766
																			UBS Asset Management AG	Mibra	194.536
																			Huatai-PineBridge Fund Management Co. Ltd.	Bikita	194.035
																			Allianz Asset Management GmbH	Greenbushes	192.872
																			Deutsche Asset & Wealth Management	Atacama(SQM)	192.603
																			First Trust Advisors LP	Atacama(SQM)	191.982
																			BNPP Asset Management Holding	Wodgina	190.72
																			Franklin Resources Inc.	Atacama(SQM)	190.595
																			BTG Pactual Global Asset Management Ltd.	Atacama(SQM)	189.491
																			Legal & General Investment Management Ltd.	Finniss	188.782
																			ABC-CA Fund Management Co. Ltd.	Greenbushes	188.535
																			AFP Provida SA	Mt Holland - Lithium	187.975
																			Truvalue Asset Management Co.,Ltd.	Bikita	187.112
																			Maven Securities Ltd.	Grota do Cirilo	186.8
																			UBS SDIC Fund Management Co. Ltd.	Qarhan Lake	186.68
																			Wanjia Asset Management Co. Ltd.	Greenbushes	186.648
																			Nomura Asset Management Co. Ltd.	Greenbushes	186.228
																			California State Teachers' Retirement System	Greenbushes	185.011
																			CIBC Pvt. Wealth Advisors Inc.	Salar del Hombre Muerto	183.154
																			Harvest Fund Management Co. Ltd.	Greenbushes	183.145
																			Lazard Asset Management LLC	Salar del Hombre Muerto	182.859
																			Global X Management Co. LLC	Bikita	182.501
																			JPMorgan Chase & Co.	Atacama(Albemarle)	182.29
																			D&C Geraghty Pty. Ltd.	Mount Marion	181.705
																			Bosera Asset Management Co. Ltd.	Greenbushes	181.086
																			LG Chem Ltd.	North American Lithium	180.304
																			Citigroup Inc.	Salar del Hombre Muerto	180.283
																			Credit Suisse Asset Management (Switzerland) Ltd.	Atacama(SQM)	180.253
																			Appian Way Asset Management LP	Grota do Cirilo	178.564
																			JP Morgan Asset Management	Altura	178.507
																			Barclays Bank PLC	Atacama(Albemarle)	176.852
																			CIBC Pvt. Wealth Advisors Inc.	Mt Cattlin	176.683
																			SEI Investments Co.	Atacama(Albemarle)	176.654
																			Lazard Asset Management LLC	Mt Cattlin	176.399
																			McCusker Charitable Foundation	Wodgina	176.318
																			Columbia Management Investment Advisers LLC	Atacama(Albemarle)	175.314
																			Citigroup Inc.	Mt Cattlin	173.913
																			Société Générale SA	Mibra	173.731
																			Eaton Vance Management	Wodgina	172.272
																			Foord Asset Management Guernsey Ltd	Salar del Hombre Muerto	171.97
																			JP Morgan Asset Management	Mount Marion	170.526
																			Polygon Global Partners LLP	Atacama(Albemarle)	170.412
																			Coatue Management LLC	Wodgina	170.321
																			Janus Henderson Group PLC	Mibra	169.772
																			Compass Group LLC	Atacama(SQM)	169.708
																			Itaú Administradora General de Fondos SA	Atacama(SQM)	169.344
																			Vest Financial LLC	Greenbushes	169.246
																			E Fund Management Co. Ltd.	Greenbushes	168.301
																			Larrainvial Administradora De Fondos S.A.	Atacama(SQM)	168.176
																			Norges Bank Investment Management	Mt Holland - Lithium	167.939
																			Citadel Advisors LLC	Wodgina	167.084
																			Zangge Mining Company Limited ESOP	Qarhan Lake	166.873
																			BNP Paribas Financial Markets SNC	Greenbushes	166.792
																			Voya Investment Management LLC	Atacama(Albemarle)	166.219
																			Foord Asset Management Guernsey Ltd	Mt Cattlin	165.894
																			Truvalue Asset Management Co.,Ltd.	Greenbushes	165.216
																			BlackRock Inc.	Finniss	165.17
																			ClearBridge Investments LLC	Salar del Hombre Muerto	164.43
																			ETFS Management (AUS) Ltd.	Pilgangoora	163.906
																			Jane Street Group LLC	Atacama(SQM)	162.872
																			Teachers Insurance and Annuity Association-College Retirement Equities Fund	Atacama(Albemarle)	162.676
																			Brett Laurence Lynch	North American Lithium	161.475
																			China Universal Asset Management Co. Ltd.	Bikita	161.458
																			Frontier Capital Management Co LLC	Greenbushes	160.971
																			BMO Asset Management Corp.	Greenbushes	160.698
																			Driehaus Capital Management LLC	Atacama(SQM)	160.431
																			CPU Share Plans Pty Ltd.	Mount Marion	160.195
																			Allianz Global Investors U.S. LLC	Wodgina	160.167
																			AllianceBernstein LP	Greenbushes	160.106
																			Schroder Investment Management Ltd.	Atacama(SQM)	160.07
																			Teachers Insurance and Annuity Association-College Retirement Equities Fund	Atacama(SQM)	159.871
																			CI Global Asset Management	Salar del Hombre Muerto	158.897
																			JPMorgan Chase & Co.	Atacama(SQM)	158.821
																			ClearBridge Investments LLC	Mt Cattlin	158.621
																			Paul Anthony Crawford	North American Lithium	158.247
																			Eric E. Jackson	Mibra	157.974
																			Caisse de dépôt et placement du Québec	Greenbushes	157.944
																			Rosefinch Fund Management Co. Ltd.	Chaerhan Lake	157.896
																			Australian Super Pty Ltd	Greenbushes	157.118
																			Empower Advisory Group LLC	Atacama(Albemarle)	157.006
																			Commonwealth Equity Services LLC	Greenbushes	156.371
																			ICBC Credit Suisse Asset Management Co. Ltd.	Greenbushes	156.367
																			Schweizerische Nationalbank	Atacama(Albemarle)	156.313
																			Xinjiang Tacheng International Resources Ltd.	Sal de los Angeles	156.037
																			Peter Barrett Capp	Pilgangoora	155.917
																			Baillie Gifford & Co.	Salar del Hombre Muerto	155.819
																			Van Eck Associates Corp.	Pastos Grandes	155.288
																			Deutsche Asset & Wealth Management	Atacama(Albemarle)	155.108
																			AXA Investment Managers SA	Greenbushes	154.711
																			Kenneth Edward Brinsden	Pilgangoora	154.297
																			Wells Fargo & Co.	Atacama(Albemarle)	154.04
																			Hermes Investment Management Ltd.	Pilgangoora	153.545
																			Nt-Comnwlth Super Corp	Mount Marion	153.53
																			CI Global Asset Management	Mt Cattlin	153.284
																			Global X Management Co. LLC	Mibra	153.209
																			Handelsbanken Asset Management	Atacama(Albemarle)	152.065
																			Russell Investment Management LLC	Greenbushes	152.015
																			Grandfield & Dodd LLC	Greenbushes	151.839
																			Kowa Company Ltd.	Mt Holland - Lithium	151.65
																			Mariner LLC	Greenbushes	151.252
																			Ping An UOB Fund Management Co. Ltd.	Greenbushes	151.228
																			Mirae Asset Global Investments Co. Ltd.	Pastos Grandes	150.447
																			Netwealth Investments Ltd.	Mount Marion	150.39
																			Baillie Gifford & Co.	Mt Cattlin	150.314
																			Global X Management Co. LLC	Pastos Grandes	150.113
																			Morgan Stanley	Atacama(SQM)	149.908
																			FMR LLC	Wodgina	148.817
																			California Public Employees' Retirement System	Greenbushes	148.22
																			PRIMECAP Management Co.	Silver Peak	148.117
																			JPMorgan Chase & Co.	Mibra	147.52
																			Geode Capital Management LLC	Mount Marion	147.085
																			BetaShares Capital Ltd.	Greenbushes	146.917
																			Principal Global Investors LLC	Greenbushes	146.757
																			Citic Securities Co. Ltd.	Bikita	146.651
																			Wellington Management Group LLP	Atacama(Albemarle)	146.632
																			Legal & General Investment Management Ltd.	Altura	146.527
																			Royal Bank of Canada	Atacama(Albemarle)	146.232
																			Nikko Asset Management Co. Ltd.	Atacama(Albemarle)	145.753
																			Guotai Asset Mgmt Co. Ltd.	Greenbushes	145.497
																			Merrill Lynch Pierce Fenner & Smith Inc.	Greenbushes	143.211
																			First Trust Advisors LP	Salar del Hombre Muerto	143.208
																			Moneda Administradora de Fondos de Invers	Atacama(SQM)	142.158
																			Van Eck Associates Corp.	Atacama(Albemarle)	141.484
																			Barclays PLC	Atacama(Albemarle)	141.153
																			China Asset Management Co. Ltd.	Bikita	140.803
																			HSBC Global Asset Management (UK) Ltd.	Greenbushes	140.567
																			Jupiter Fund Management PLC	Wodgina	140.515
																			National Pension Service	Greenbushes	140.173
																			Zhejiang Hongyue Private Fund Management Co. Ltd.	Qarhan Lake	139.744
																			Capital Advisors Inc.	Atacama(SQM)	139.288
																			Dimensional Fund Advisors LP	Mount Marion	139.217
																			Jane Street Group LLC	Atacama(Albemarle)	139.213
																			Envestnet Asset Management Inc.	Greenbushes	138.844
																			Administradora General de Fondos Security SA	Atacama(SQM)	138.767
																			First Trust Advisors LP	Mt Cattlin	138.149
																			Managed Account Advisors LLC	Wodgina	138.026
																			Stichting Pensioenfonds ABP	Wodgina	137.705
																			Goldman Sachs Asset Management LP	Wodgina	137.67
																			Mitsubishi UFJ Asset Management Co. Ltd.	Greenbushes	137.656
																			Liontrust Asset Management PLC	Atacama(SQM)	137.199
																			Van Eck Associates Corp.	Wodgina	136.899
																			Schweizerische Nationalbank	Salar del Hombre Muerto	136.621
																			Allianz Asset Management GmbH	Mount Marion	135.735
																			Davenport & Co. LLC	Greenbushes	135.035
																			Harvest Fund Management Co. Ltd.	Chaerhan Lake	134.807
																			McCusker Charitable Foundation	Mount Marion	134.209
																			Canada Pension Plan Investment Board	Wodgina	132.866
																			Tredje AP-fonden	Greenbushes	132.751
																			ZKB Asset Management	Atacama(Albemarle)	132.681
																			Citigroup Inc.	Atacama(Albemarle)	132.117
																			Schweizerische Nationalbank	Mt Cattlin	131.794
																			Citic Securities Co. Ltd.	Qarhan Lake	131.446
																			Royal London Asset Management Ltd.	Atacama(SQM)	130.97
																			Dimensional Fund Advisors LP	Altura	130.475
																			John Anthony Kanellitsas	Pastos Grandes	130.336
																			Netwealth Investments Ltd.	Greenbushes	128.958
																			Northern Trust Global Investments	Altura	128.572
																			Huashang Fund Management Co. Ltd.	Greenbushes	128.489
																			Netwealth Investments Ltd.	Pilgangoora	128.317
																			BICE Inversiones Administradora General de Fondos SA	Atacama(SQM)	128.202
																			GF Securities Asset Management Co.Ltd.	Qarhan Lake	128.026
																			Voya Investment Management LLC	Salar del Hombre Muerto	127.6
																			Boston Common Asset Management LLC	Atacama(SQM)	126.838
																			China Merchants Securities Asset Management Co. Ltd.	Qarhan Lake	126.52
																			RobecoSAM AG	Salar del Hombre Muerto	125.619
																			Damask Inc.	Grota do Cirilo	125.607
																			Border To Coast Pensions Partnership Ltd.	Atacama(SQM)	125.283
																			Twin Tree Management LP	Greenbushes	124.877
																			E Fund Management Co. Ltd.	Chaerhan Lake	123.97
																			Teachers' Retirement System of the State of Kentucky	Atacama(SQM)	123.834
																			Australian Super Pty Ltd	Wodgina	123.761
																			Susquehanna International Group LLP	Atacama(Albemarle)	123.259
																			JPMorgan Chase & Co.	Wodgina	123.186
																			Voya Investment Management LLC	Mt Cattlin	123.092
																			Australian Foundation Investment Co. Ltd.	Wodgina	122.909
																			Eaton Vance Management	Salar del Hombre Muerto	121.527
																			Russell Investment Management LLC	Atacama(SQM)	121.495
																			Franklin Templeton Sealand Fund Management Co. Ltd.	Bikita	121.424
																			Credit Suisse Asset Management (Switzerland) Ltd.	Pilgangoora	121.383
																			RobecoSAM AG	Mt Cattlin	121.181
																			Van Eck Associates Corp.	North American Lithium	120.973
																			Baker Steel Capital Managers LLP	Mibra	120.461
																			Truvalue Asset Management Co.,Ltd.	Chaerhan Lake	120.182
																			UBS Asset Management AG	Pilgangoora	120.069
																			MUFG Bank Ltd.	Salar de Olaroz	119.867
																			Barclays Bank PLC	Wodgina	119.511
																			SEI Investments Co.	Wodgina	119.377
																			Milford Asset Management LTD	Pilgangoora	119.093
																			Credit Suisse Asset Management (Switzerland) Ltd.	Greenbushes	118.87
																			Schroder Investment Management Ltd.	Atacama(Albemarle)	118.655
																			Australian Super Pty Ltd	Salar de Olaroz	118.491
																			Columbia Management Investment Advisers LLC	Wodgina	118.472
																			BetaShares Capital Ltd.	Salar del Hombre Muerto	117.983
																			New York State Teachers' Retirement System	Greenbushes	117.832
																			NS Partners Ltd	Atacama(SQM)	117.457
																			Huatai-PineBridge Fund Management Co. Ltd.	Chaerhan Lake	117.275
																			Eaton Vance Management	Mt Cattlin	117.234
																			New York State Common Retirement Fund	Greenbushes	117.108
																			BlackRock Inc.	Salar de Olaroz	117.031
																			Invesco Ltd.	Atacama(Albemarle)	116.768
																			Walleye Capital LLC	Greenbushes	116.134
																			GWL Investment Management Ltd.	Greenbushes	115.852
																			Van Eck Associates Corp.	Finniss	115.386
																			Polygon Global Partners LLP	Wodgina	115.159
																			Columbia Management Investment Advisers LLC	Atacama(SQM)	115.048
																			abrdn PLC	Mt Holland - Lithium	114.936
																			RBC Global Asset Management Inc.	Atacama(SQM)	114.852
																			Jinzhi Jiang	Greenbushes	114.628
																			Gold Fields Ltd.	Wodgina	113.955
																			BetaShares Capital Ltd.	Mt Cattlin	113.815
																			Invesco Ltd.	Salar de Olaroz	113.328
																			UBS SDIC Fund Management Co. Ltd.	Mount Marion	113.239
																			BYD Company Ltd.	Sabi Star	113.119
																			Voya Investment Management LLC	Wodgina	112.326
																			Hardman Johnston Global Advisors LLC	Greenbushes	112.203
																			Korea Investment Corp.	Greenbushes	112.085
																			Geode Capital Management LLC	Silver Peak	111.865
																			Norges Bank Investment Management	Silver Peak	111.267
																			Cesar Chicayban	Grota do Cirilo	111.123
																			Amundi Asset Management SAS	Altura	111.111
																			Meichun Sun	Tanco	110.949
																			AFP Provida SA	Atacama(Albemarle)	110.352
																			State Board of Administration of Florida	Greenbushes	109.688
																			Nikko Asset Management Co. Ltd.	Salar de Olaroz	109.676
																			INTECH Investment Management LLC	Greenbushes	109.271
																			Legal & General Investment Management Ltd.	Mount Marion	109.27
																			Franco Mignacco	Pastos Grandes	108.573
																			Danielle Sharon Tudehope	Pilgangoora	107.943
																			D.E. Shaw & Co. LP	Greenbushes	107.824
																			BNPP Asset Management Holding	North American Lithium	107.795
																			Mitsubishi UFJ Trust and Banking Corp.	Atacama(Albemarle)	107.712
																			Daiwa Asset Management Co. Ltd.	Salar de Olaroz	107.431
																			STRS Ohio	Atacama(SQM)	107.15
																			JP Morgan Asset Management	Wodgina	107.115
																			London Co. of Virginia LLC	Atacama(Albemarle)	107.104
																			Jupiter Fund Management PLC	Mount Marion	106.956
																			Samlyn Capital LLC	Greenbushes	106.498
																			Empower Advisory Group LLC	Wodgina	106.1
																			Goldman Sachs Asset Management LP	Mibra	106.035
																			Baker Steel Capital Managers LLP	Pilgangoora	105.847
																			Schweizerische Nationalbank	Wodgina	105.632
																			Deutsche Asset & Wealth Management	Pilgangoora	105.261
																			Deutsche Asset & Wealth Management	Wodgina	104.817
																			Group One Trading L.P.	Greenbushes	104.696
																			Van Eck Associates Corp.	Mount Marion	104.204
																			Wells Fargo & Co.	Wodgina	104.096
																			Allan Charles Buckler	North American Lithium	103.985
																			Nordea Investment Management AB	Salar del Hombre Muerto	103.759
																			BNY Asset Management	Altura	103.377
																			ALPS Advisors Inc.	Greenbushes	103.23
																			China Asset Management Co. Ltd.	Mount Marion	103.18
																			Norges Bank Investment Management	Finniss	103.082
																			SPF Beheer BV	Atacama(Albemarle)	102.912
																			Handelsbanken Asset Management	Wodgina	102.761
																			GWL Investment Management Ltd.	Salar del Hombre Muerto	102.672
																			Eaton Vance Management	Atacama(SQM)	102.501
																			BTG Pactual Serviços Financeiros S.A. Distribuidora de Títulos e Valores Mobiliá	Grota do Cirilo	102.168
																			ALPS Advisors Inc.	Salar del Hombre Muerto	102.167
																			DNB Asset Management AS	Greenbushes	102.02
																			Goldman Sachs Group Inc.	Atacama(SQM)	101.772
																			Ossiam	Greenbushes	101.576
																			PGGM	Greenbushes	101.208
																			Adage Capital Management LP	Greenbushes	100.885
																			Truvalue Asset Management Co.,Ltd.	Mount Marion	100.738
																			Baillie Gifford & Co.	Silver Peak	100.367
																			AQR Capital Management LLC	Greenbushes	100.357
																			Nordea Investment Management AB	Mt Cattlin	100.093
																			Bridgewater Associates LP	Greenbushes	99.7255

## Sheet: Figure 6
												2012
2012	Exporting country	Importing country	Trade volume (Tons)									GeoPolRisk values	Mines	Companies	Shareholders
	Australia	China	9970.21									Republic of Korea	0.100072	0.0863381	0.0990427
	Chile	China	2473.34									Japan	0.0994706	0.0858191	0.0952779
	Viet Nam	China	137.08									EU	0.0999089	0.0861971	0.0970867
	Argentina	China	74.4104									China	0.0495055	0.0427113	0.0447853
	Rep. of Korea	China	39.643									USA	0.0846424	0.022856	0.020048
	Other Asia, nes	China	31.878
	Japan	China	30.3477
	Chile	China	24.8688
	Russian Federation	China	19.8007									2016
	Germany	China	10.1096									GeoPolRisk values	Mines	Companies	Shareholders
	Chile	Japan	1805.46									Republic of Korea	0.0999082	0.0998658	0.100832
	USA	Japan	650.12									Japan	0.103098	0.0962328	0.0986254
	Argentina	Japan	446.426									EU	0.101483	0.10144	0.0985146
	China	Japan	135.292									China	0.0521158	0.0349897	0.0412852
	China	Japan	70.9841									USA	0.0929794	0.0192872	0.0247744
	China	Japan	63.4012
	Belgium	Japan	23
	Germany	Japan	11.6886
	USA	Japan	10.2971									2020
	Chile	Rep. of Korea	2491.73									GeoPolRisk values	Mines	Companies	Shareholders
	China	Rep. of Korea	76.8669									Republic of Korea	0.147199	0.104672	0.124805
	Chile	Rep. of Korea	74.7831									Japan	0.150547	0.101008	0.12505
	Japan	Rep. of Korea	49.0663									EU	0.131261	0.0461343	0.102317
	China	Rep. of Korea	47.3284									China	0.0687755	0.0381033	0.0517762
	China	Rep. of Korea	41.6873									USA	0.0848976	0.0143726	0.0191829
	Argentina	Rep. of Korea	40.5948
	USA	Rep. of Korea	26.2061
	India	Rep. of Korea	23
	Belgium	Rep. of Korea	12.696									2023
	Germany	Rep. of Korea	11.5092									GeoPolRisk values	Mines	Companies	Shareholders
	Chile	USA	1363.06									Republic of Korea	0.143584	0.0915047	0.119884
	Argentina	USA	1056.58									Japan	0.148045	0.0856499	0.115153
	Chile	USA	239.489									EU	0.12484	0.0177226	0.0730742
	China	USA	151.223									China	0.0760887	0.0418931	0.0622813
	China	USA	56.1624									USA	0.10091	0.00724608	0.00691066
	Belgium	USA	21.9046
	China	USA	18.9635
	Germany	USA	14.3561
	Chile	EUR	2262.49
	Chile	EUR	291.061
	China	EUR	266.971
	USA	EUR	171.851
	Russian Federation	EUR	93.84
	China	EUR	79.707
	USA	EUR	72.6479
	China	EUR	60.4179
	Russian Federation	EUR	58.7659
	India	EUR	52.4432
	Argentina	EUR	43.052
	Special Categories	EUR	21.22
2016	Exporting country	Importing country	Trade volume (Tons)
	Australia	China	10248.2
	Chile	China	2844.06
	Argentina	China	1075.31
	Japan	China	851.693
	Rep. of Korea	China	441.544
	Japan	China	347.768
	Germany	China	61.9049
	Rep. of Korea	China	58.6893
	USA	China	30.1539
	Thailand	China	21.3341
	USA	China	17.233
	Netherlands	China	17.0039
	Other Asia, nes	China	9.78461
	Chile	Japan	2452.47
	USA	Japan	962.333
	China	Japan	543.795
	Argentina	Japan	318.623
	China	Japan	162.482
	China	Japan	53.8994
	Russian Federation	Japan	20.1547
	Belgium	Japan	18.86
	USA	Japan	15.9802
	Chile	Rep. of Korea	3474.01
	China	Rep. of Korea	488.365
	Chile	Rep. of Korea	338.597
	Argentina	Rep. of Korea	304.881
	China	Rep. of Korea	87.9066
	Japan	Rep. of Korea	47.7015
	USA	Rep. of Korea	22.0973
	Belgium	Rep. of Korea	14.72
	India	Rep. of Korea	11.5925
	Argentina	USA	1997.98
	Chile	USA	876.977
	China	USA	367.424
	Mexico	USA	239.09
	Chile	USA	136.925
	Belgium	USA	69.8059
	China	USA	62.5662
	Russian Federation	USA	43.89
	China	USA	20.8905
	Other Asia, nes	USA	10.0239
	Germany	USA	9.66156
	Chile	EUR	2689.09
	China	EUR	658.744
	Russian Federation	EUR	202.22
	Chile	EUR	201.262
	USA	EUR	193.51
	Argentina	EUR	158.051
	Russian Federation	EUR	92.207
	USA	EUR	63.9898
	China	EUR	51.3747
	India	EUR	42.5534
	China	EUR	20.6089
2020	Exporting country	Importing country	Trade volume (Tons)
	Australia	China	33826.8
	Chile	China	6977.98
	Argentina	China	2414.07
	Chile	China	53.794
	Russian Federation	China	24.586
	Rep. of Korea	China	21.8394
	Brazil	China	21.16
	Germany	China	20.8597
	Rep. of Korea	China	18.1115
	Japan	China	13.4483
	China	Japan	4313.28
	Chile	Japan	2512.96
	USA	Japan	861.277
	China	Japan	435.949
	Argentina	Japan	366.468
	Russian Federation	Japan	130.187
	China	Japan	95.6059
	Chile	Japan	57.915
	USA	Japan	21.5098
	Rep. of Korea	Japan	16.5351
	Thailand	Japan	10.028
	Chile	Rep. of Korea	5096.28
	China	Rep. of Korea	4718.44
	Chile	Rep. of Korea	920.976
	China	Rep. of Korea	668.89
	Russian Federation	Rep. of Korea	284.633
	China	Rep. of Korea	215.216
	Argentina	Rep. of Korea	100.872
	USA	Rep. of Korea	42.3052
	Japan	Rep. of Korea	23.6668
	Argentina	USA	1398.97
	Chile	USA	753.709
	China	USA	336.654
	Russian Federation	USA	120.816
	Chile	USA	117.219
	Belgium	USA	55.5468
	Other Asia, nes	USA	45.0915
	China	USA	32.7616
	Japan	USA	27.7101
	Germany	USA	16.5315
	Russian Federation	USA	15.088
	Germany	USA	9.61322
	Chile	EUR	2594.11
	China	EUR	536.404
	Russian Federation	EUR	396.44
	Switzerland	EUR	292.718
	Argentina	EUR	277.642
	Russian Federation	EUR	154.33
	USA	EUR	92.9984
	United Kingdom	EUR	91.4718
	China	EUR	73.1709
	United Kingdom	EUR	68.363
	Special Categories	EUR	64.9922
	China	EUR	40.2529
	United Kingdom	EUR	23.6057
	Rep. of Korea	EUR	13.5813
2023	Exporting country	Importing country	Trade volume (Tons)
	Australia	China	76043.8
	Chile	China	26065.1
	Zimbabwe	China	6211.96
	Brazil	China	4092.22
	Argentina	China	3431.07
	Canada	China	1998.97
	Nigeria	China	1252.89
	South Africa	China	1210.21
	Chile	China	283.978
	Rep. of Korea	China	147.761
	China	China	135.946
	USA	China	91.166
	United Kingdom	China	71.4413
	Australia	China	68.3224
	China	China	58.4729
	Japan	China	48.9603
	Rep. of Korea	China	34.2867
	Russian Federation	China	33.0107
	Japan	China	24.889
	India	China	17.4965
	Japan	China	11.0966
	China	Japan	5770.83
	Chile	Japan	2179.73
	Argentina	Japan	882.397
	USA	Japan	739.15
	Rep. of Korea	Japan	20.1705
	Germany	Japan	15.8295
	United Kingdom	Japan	11.2831
	Thailand	Japan	9.568
	China	Rep. of Korea	16297.9
	Chile	Rep. of Korea	11818
	Argentina	Rep. of Korea	507.619
	USA	Rep. of Korea	290.901
	Japan	Rep. of Korea	248.543
	United Kingdom	Rep. of Korea	226.561
	Russian Federation	Rep. of Korea	104.78
	Other Asia, nes	Rep. of Korea	20.48
	Belgium	Rep. of Korea	18.8
	Chile	USA	1690.03
	Argentina	USA	1438.01
	China	USA	274.689
	Japan	USA	66.2934
	Belgium	USA	58.3659
	Other Asia, nes	USA	22.9989
	United Kingdom	USA	15.0417
	India	USA	13.2433
	Germany	USA	12.7147
	Spain	USA	10.0577
	Chile	EUR	1392.22
	China	EUR	1114.06
	USA	EUR	291.79
	Argentina	EUR	165.297
	United Kingdom	EUR	158.145
	Switzerland	EUR	127.322
	Russian Federation	EUR	103.22
	Japan	EUR	21.3115
	Rep. of Korea	EUR	19.2748
	Special Categories	EUR	14.7454
	Brazil	EUR	13.8901
	South Africa	EUR	9.78037

## Sheet: 2012
	Company’s country	Lithium mining companies	Production (t,LCE)		Lithium mining companies	Mines	Production (t,LCE)		Lithium mining companies	Shareholders of lithium companies	Production (t,LCE)		Mine’s country	Mines	Production (t,LCE)		Shareholders of lithium companies	Shareholder’s country	Production (t,LCE)		Shareholders of lithium companies	Mines	Production (t,LCE)
	Australia	Talison Lithium Ltd.	53000		Talison Lithium Ltd.	Greenbushes	53000		Talison Lithium Ltd.	RCF Management LLC	19705.4		Australia	Greenbushes	53000		RCF Management LLC	USA	19705.4		RCF Management LLC	Greenbushes	19705.4
	Chile	Sociedad Química y Minera de Chile S.A.	41000		Sociedad Química y Minera de Chile S.A.	Salar de Atacama1	41000		Sociedad Química y Minera de Chile S.A.	Nutrien Ltd.	13117.9		Chile	Salar de Atacama1	41000		Nutrien Ltd.	Canada	13117.9		Tianqi Lithium Corp.	Greenbushes	10893.1
	USA	Rockwood Holdings Inc.	33169		Rockwood Holdings Inc.	Salar de Atacama2	29208		Talison Lithium Ltd.	Tianqi Lithium Corp.	10893.1		Chile	Salar de Atacama2	29208		Tianqi Lithium Corp.	China	10893.1		Royal Bank of Canada	Greenbushes	7331.77
	USA	FMC Corp.	14202		FMC Corp.	Salar del Hombre Muerto	14202		Yichun Tantalum Co Ltd	Jiangxi Tungsten Holding Group Co., LTD	9787		Argentina	Salar del Hombre Muerto	14202		Jiangxi Tungsten Holding Group Co., LTD	China	9787		RBC Dominion Securities Inc.	Greenbushes	2862.83
	China	Yichun Tantalum Co Ltd	9787		Yichun Tantalum Co Ltd	Yichun	9787		Sociedad Química y Minera de Chile S.A.	Inversiones SQYA S.A	9712.9		China	Yichun	9787		Inversiones SQYA S.A	Chile	9712.9		Goldman Sachs Group Inc.	Greenbushes	2585.47
	Zimbabwe	Bikita Minerals (PTY) Ltd	5505		Bikita Minerals (PTY) Ltd	Bikita	5505		Talison Lithium Ltd.	Royal Bank of Canada	7331.77		Zimbabwe	Bikita	5505		China Firms	China	7826		CIBC Mellon Trust Co.	Greenbushes	2030.82
	China	Sichuan Mineral Industry Co., Ltd.	4856		Sichuan Mineral Industry Co., Ltd.	Jiajika	4856		Bikita Minerals (PTY) Ltd	Zimbabwe Firms	5505		China	Jiajika	4856		Royal Bank of Canada	Canada	7331.77		Merrill Lynch Pierce Fenner & Smith Inc.	Greenbushes	1974.75
	Australia	Galaxy Resources Ltd.	3651		Rockwood Holdings Inc.	Silver Peak	3961		Sichuan Mineral Industry Co., Ltd.	China Firms	4856		USA	Silver Peak	3961		Zimbabwe Firms	Zimbabwe	5505		AQR Arbitrage LLC	Greenbushes	1022.08
	China	Western Mining Group Co. Ltd.	2970		Galaxy Resources Ltd.	Mt Cattlin	3651		Rockwood Holdings Inc.	T. Rowe Price Group Inc.	4289.18		Australia	Mt Cattlin	3651		T. Rowe Price Group Inc.	USA	4955.66		Longfellow Investment Management Co. LLC	Greenbushes	523.754
	China	Tibet Mineral Dev. Co. LTD	2592		Western Mining Group Co. Ltd.	East Taijinair	2970		Western Mining Group Co. Ltd.	China Firms	2970		China	East Taijinair	2970		BlackRock Inc.	USA	3422.42		Global X Management Co. LLC	Greenbushes	372.615
	China	Qinghai Zhongxin Guoan Technology development Co., LTD	1980		Tibet Mineral Dev. Co. LTD	Zhabuye	2592		Talison Lithium Ltd.	RBC Dominion Securities Inc.	2862.83		China	Zhabuye	2592		RBC Dominion Securities Inc.	Canada	2862.83		Vertex One Asset Management Inc.	Greenbushes	333.298
	Portugal	Grupo Mota	1280		Qinghai Zhongxin Guoan Technology development Co., LTD	West Taijinair	1980		Sociedad Química y Minera de Chile S.A.	Nitratos de Chile SA	2790.95		China	West Taijinair	1980		Vanguard Group Inc.	USA	2822.95		Water Island Capital LLC	Greenbushes	231.67
	Brazil	Companhia Brasileira de Lítio	606		Grupo Mota	Alvarroes	1280		Talison Lithium Ltd.	Goldman Sachs Group Inc.	2585.47		Portugal	Alvarroes	1280		Nitratos de Chile SA	Chile	2790.95		David Andrew Shaw	Greenbushes	189.127
	China	Qinghai Salt Lake Industry Co.	451		Companhia Brasileira de Lítio	Cachoeira	606		Rockwood Holdings Inc.	Morgan Stanley Investment Management Inc.	2099.35		Brazil	Cachoeira	606		Morgan Stanley Investment Management Inc.	USA	2587.89		Syquant Capital SAS	Greenbushes	179.457
					Qinghai Salt Lake Industry Co.	Chaerhan Lake	451		Rockwood Holdings Inc.	Atlantic Investment Management Inc.	2061.67		China	Chaerhan Lake	451		Goldman Sachs Group Inc.	USA	2585.47		PineBridge Investments LLC	Greenbushes	114.651
									Talison Lithium Ltd.	CIBC Mellon Trust Co.	2030.82						Atlantic Investment Management Inc.	USA	2061.67		Aegon Asset Management UK Plc	Greenbushes	113.271
									Qinghai Zhongxin Guoan Technology development Co., LTD	Zhongxin Guoan	1980						CIBC Mellon Trust Co.	Canada	2030.82		Jennison Associates LLC	Greenbushes	107.773
									Talison Lithium Ltd.	Merrill Lynch Pierce Fenner & Smith Inc.	1974.75						Zhongxin Guoan	China	1980		Nutrien Ltd.	Salar de Atacama1	13117.9
									FMC Corp.	Capital Research & Mgmt Co.	1615.21						Merrill Lynch Pierce Fenner & Smith Inc.	USA	1974.75		Inversiones SQYA S.A	Salar de Atacama1	9712.9
									Rockwood Holdings Inc.	Iridian Asset Management LLC	1550.57						Iridian Asset Management LLC	USA	1727.72		Nitratos de Chile SA	Salar de Atacama1	2790.95
									Rockwood Holdings Inc.	Vanguard Group Inc.	1441.74						Capital Research & Mgmt Co.	USA	1615.21		Global Mining Investments (Chile ) S.A.	Salar de Atacama1	1370.39
									Sociedad Química y Minera de Chile S.A.	Global Mining Investments (Chile ) S.A.	1370.39						FMR LLC	USA	1569.69		BlackRock Inc.	Salar de Atacama1	973.549
									Rockwood Holdings Inc.	Barrow Hanley Mewhinney & Strauss LLC	1342.11						Global Mining Investments (Chile ) S.A.	Chile	1370.39		T. Rowe Price Group Inc.	Salar de Atacama1	666.481
									Grupo Mota	Portugal Firms	1280						Barrow Hanley Mewhinney & Strauss LLC	USA	1342.11		Kowa Company Ltd.	Salar de Atacama1	575.346
									Rockwood Holdings Inc.	BlackRock Inc.	1272.76						Portugal Firms	Portugal	1280		Morgan Stanley Investment Management Inc.	Salar de Atacama1	488.534
									FMC Corp.	BlackRock Inc.	1176.11						Jana Partners Management LP	USA	1172.68		Vanguard Group Inc.	Salar de Atacama1	364.704
									Rockwood Holdings Inc.	Jana Partners Management LP	1172.68						State Street Global Advisors Inc.	USA	1026.2		Baillie Gifford & Co.	Salar de Atacama1	354.461
									Talison Lithium Ltd.	AQR Arbitrage LLC	1022.08						AQR Arbitrage LLC	USA	1022.08		Neuberger Berman BD LLC prior to change in line of business	Salar de Atacama1	332.457
									Rockwood Holdings Inc.	Cadian Capital Management LP	996.367						Cadian Capital Management LP	USA	996.367		Van Eck Associates Corp.	Salar de Atacama1	276.567
									Sociedad Química y Minera de Chile S.A.	BlackRock Inc.	973.549						Axon Capital LP	USA	924.287		Administradora de Fondos de Pensiones Cuprum SA	Salar de Atacama1	245.717
									FMC Corp.	FMR LLC	972.314						Allianz Asset Management GmbH	Germany	702.934		Scout Investments Inc.	Salar de Atacama1	218.099
									Rockwood Holdings Inc.	Axon Capital LP	924.287						Fred Alger Management LLC	USA	701.116		ClariVest Asset Management LLC	Salar de Atacama1	205.825
									FMC Corp.	Vanguard Group Inc.	862.061						PPM America Inc.	USA	674.241		William Blair Investment Management LLC	Salar de Atacama1	194.657
									Rockwood Holdings Inc.	Allianz Asset Management GmbH	702.934						First Eagle Investment Management LLC	USA	631.225		Frank Russell Co.	Salar de Atacama1	134.583
									Rockwood Holdings Inc.	Fred Alger Management LLC	701.116						Brazil Firms	Brazil	606		Federated Hermes, Inc.	Salar de Atacama1	133.54
									Galaxy Resources Ltd.	PPM America Inc.	674.241						Kowa Company Ltd.	Japan	575.346		State Street Global Advisors Inc.	Salar de Atacama1	132.078
									Sociedad Química y Minera de Chile S.A.	T. Rowe Price Group Inc.	666.481						JP Morgan Asset Management	USA	542.711		GE Asset Management Inc.	Salar de Atacama1	122.443
									Rockwood Holdings Inc.	First Eagle Investment Management LLC	631.225						Longfellow Investment Management Co. LLC	USA	523.754		Principal Global Investors LLC	Salar de Atacama1	110.365
									Companhia Brasileira de Lítio	Brazil Firms	606						RS Investment Management Co. LLC	USA	505.05		Columbia Wanger Asset Management LLC	Salar de Atacama1	109.961
									Rockwood Holdings Inc.	FMR LLC	597.371						Sculptor Capital Management Inc.	USA	488.289		T. Rowe Price Group Inc.	Salar de Atacama2	3776.59
									FMC Corp.	State Street Global Advisors Inc.	588.694						American Century Investment Management Inc	USA	470.542		Morgan Stanley Investment Management Inc.	Salar de Atacama2	1848.47
									Sociedad Química y Minera de Chile S.A.	Kowa Company Ltd.	575.346						William Blair Investment Management LLC	USA	459.592		Atlantic Investment Management Inc.	Salar de Atacama2	1815.28
									FMC Corp.	JP Morgan Asset Management	542.711						Tibet Mining Asset Operation Co. Ltd.	China	458.525		Iridian Asset Management LLC	Salar de Atacama2	1365.27
									Talison Lithium Ltd.	Longfellow Investment Management Co. LLC	523.754						Gates Capital Management Inc.	USA	458.304		Vanguard Group Inc.	Salar de Atacama2	1269.45
									Sociedad Química y Minera de Chile S.A.	Morgan Stanley Investment Management Inc.	488.534						D.E. Shaw & Co. LP	USA	449.396		Barrow Hanley Mewhinney & Strauss LLC	Salar de Atacama2	1181.72
									Rockwood Holdings Inc.	Sculptor Capital Management Inc.	488.289						Southpoint Capital Advisors LP	USA	387.914		BlackRock Inc.	Salar de Atacama2	1120.66
									Tibet Mineral Dev. Co. LTD	Tibet Mining Asset Operation Co. Ltd.	458.525						Global X Management Co. LLC	USA	372.615		Jana Partners Management LP	Salar de Atacama2	1032.54
									Rockwood Holdings Inc.	Gates Capital Management Inc.	458.304						Cramer Rosenthal McGlynn LLC	USA	368.523		Cadian Capital Management LP	Salar de Atacama2	877.295
									Rockwood Holdings Inc.	D.E. Shaw & Co. LP	449.396						Baillie Gifford & Co.	United Kingdom	354.461		Axon Capital LP	Salar de Atacama2	813.829
									Rockwood Holdings Inc.	Southpoint Capital Advisors LP	387.914						ClearBridge Investments LLC	USA	335.813		Allianz Asset Management GmbH	Salar de Atacama2	702.934
									Talison Lithium Ltd.	Global X Management Co. LLC	372.615						Vertex One Asset Management Inc.	Canada	333.298		Fred Alger Management LLC	Salar de Atacama2	701.116
									FMC Corp.	Cramer Rosenthal McGlynn LLC	368.523						Neuberger Berman BD LLC prior to change in line of business	USA	332.457		First Eagle Investment Management LLC	Salar de Atacama2	631.225
									Sociedad Química y Minera de Chile S.A.	Vanguard Group Inc.	364.704						Invesco Ltd.	USA	321.197		FMR LLC	Salar de Atacama2	597.371
									Sociedad Química y Minera de Chile S.A.	Baillie Gifford & Co.	354.461						Jennison Associates LLC	USA	303.532		Sculptor Capital Management Inc.	Salar de Atacama2	488.289
									Rockwood Holdings Inc.	ClearBridge Investments LLC	335.813						Northern Trust Global Investments	United Kingdom	301.601		Gates Capital Management Inc.	Salar de Atacama2	458.304
									Talison Lithium Ltd.	Vertex One Asset Management Inc.	333.298						Allianz Global Investors U.S. LLC	USA	298.902		D.E. Shaw & Co. LP	Salar de Atacama2	449.396
									Sociedad Química y Minera de Chile S.A.	Neuberger Berman BD LLC prior to change in line of business	332.457						Teachers Insurance and Annuity Association-College Retirement Equities Fund	USA	288.037		Southpoint Capital Advisors LP	Salar de Atacama2	387.914
									FMC Corp.	RS Investment Management Co. LLC	329.593						Van Eck Associates Corp.	USA	276.567		ClearBridge Investments LLC	Salar de Atacama2	335.813
									Rockwood Holdings Inc.	Invesco Ltd.	321.197						Janus Henderson Investors US LLC	USA	273.959		Invesco Ltd.	Salar de Atacama2	321.197
									Rockwood Holdings Inc.	State Street Global Advisors Inc.	305.427						BNY Asset Management	USA	271.261		State Street Global Advisors Inc.	Salar de Atacama2	305.427
									Rockwood Holdings Inc.	Allianz Global Investors U.S. LLC	298.902						LSV Asset Management	USA	269.07		Allianz Global Investors U.S. LLC	Salar de Atacama2	298.902
									Sociedad Química y Minera de Chile S.A.	Van Eck Associates Corp.	276.567						Adage Capital Management LP	USA	267.816		American Century Investment Management Inc	Salar de Atacama2	271.353
									FMC Corp.	Janus Henderson Investors US LLC	273.959						Columbia Wanger Asset Management LLC	USA	261.787		Adage Capital Management LP	Salar de Atacama2	267.816
									Rockwood Holdings Inc.	American Century Investment Management Inc	271.353						Seifollah Ghasemi	USA	261.706		William Blair Investment Management LLC	Salar de Atacama2	264.936
									FMC Corp.	LSV Asset Management	269.07						Massachusetts Financial Services Company	USA	258.182		Seifollah Ghasemi	Salar de Atacama2	261.706
									Rockwood Holdings Inc.	Adage Capital Management LP	267.816						Administradora de Fondos de Pensiones Cuprum SA	Chile	245.717		Massachusetts Financial Services Company	Salar de Atacama2	258.182
									Rockwood Holdings Inc.	William Blair Investment Management LLC	264.936						Creat Resources Holdings Ltd.	Australia	244.775		Corvex Management LP	Salar de Atacama2	204.669
									Rockwood Holdings Inc.	Seifollah Ghasemi	261.706						Water Island Capital LLC	USA	231.67		Standard Investments LLC	Salar de Atacama2	192.017
									Rockwood Holdings Inc.	Massachusetts Financial Services Company	258.182						Luther King Capital Management Corp.	USA	224.009		Amundi Asset Management SAS	Salar de Atacama2	187.143
									Sociedad Química y Minera de Chile S.A.	Administradora de Fondos de Pensiones Cuprum SA	245.717						Scout Investments Inc.	USA	218.099		RS Investment Management Co. LLC	Salar de Atacama2	175.457
									Galaxy Resources Ltd.	Creat Resources Holdings Ltd.	244.775						Sasco Capital Inc.	USA	213.255		Brown Advisory Inc.	Salar de Atacama2	156.238
									Talison Lithium Ltd.	Water Island Capital LLC	231.67						ClariVest Asset Management LLC	USA	205.825		Norges Bank Investment Management	Salar de Atacama2	146.051
									FMC Corp.	Luther King Capital Management Corp.	224.009						Corvex Management LP	USA	204.669		Two Sigma Investments LP	Salar de Atacama2	144.27
									Sociedad Química y Minera de Chile S.A.	Scout Investments Inc.	218.099						Standard Investments LLC	USA	192.017		Serengeti Asset Management LP	Salar de Atacama2	139.547
									FMC Corp.	Sasco Capital Inc.	213.255						Frontier Capital Management Co LLC	USA	189.872		Denver Investment Advisors LLC	Salar de Atacama2	137.58
									Sociedad Química y Minera de Chile S.A.	ClariVest Asset Management LLC	205.825						David Andrew Shaw	Canada	189.127		UBS Asset Management AG	Salar de Atacama2	137.463
									Rockwood Holdings Inc.	Corvex Management LP	204.669						Amundi Asset Management SAS	France	187.143		Mackenzie Financial Corp.	Salar de Atacama2	135.416
									FMC Corp.	American Century Investment Management Inc	199.189						Syquant Capital SAS	France	179.457		NLG Capital Inc.	Salar de Atacama2	135.134
									FMC Corp.	Jennison Associates LLC	195.759						Wellington Management Group LLP	USA	173.575		BNY Asset Management	Salar de Atacama2	133.952
									Sociedad Química y Minera de Chile S.A.	William Blair Investment Management LLC	194.657						SailingStone Capital Partners LLC	USA	172.101		Teachers Insurance and Annuity Association-College Retirement Equities Fund	Salar de Atacama2	128.899
									Rockwood Holdings Inc.	Standard Investments LLC	192.017						Brown Advisory Inc.	USA	156.238		Riverbridge Partners LLC	Salar de Atacama2	126.582
									FMC Corp.	Frontier Capital Management Co LLC	189.872						Norges Bank Investment Management	Norway	146.051		Northern Trust Global Investments	Salar de Atacama2	118.148
									Talison Lithium Ltd.	David Andrew Shaw	189.127						Two Sigma Investments LP	USA	144.27		Brighthouse Investment Advisers LLC	Salar de Atacama2	115.572
									Rockwood Holdings Inc.	Amundi Asset Management SAS	187.143						Qinghai State-owned Assets Investment and Management Co. Ltd.	China	139.765		GAMCO Investors Inc.	Salar de Atacama2	111.972
									FMC Corp.	Northern Trust Global Investments	183.454						Serengeti Asset Management LP	USA	139.547		Renaissance Technologies LLC	Salar de Atacama2	104.865
									Talison Lithium Ltd.	Syquant Capital SAS	179.457						Denver Investment Advisors LLC	USA	137.58		ClearArc Capital Inc.	Salar de Atacama2	100.478
									FMC Corp.	Iridian Asset Management LLC	177.144						UBS Asset Management AG	Switzerland	137.463		PPM America Inc.	Mt Cattlin	674.241
									Rockwood Holdings Inc.	RS Investment Management Co. LLC	175.457						Mackenzie Financial Corp.	Canada	135.416		Creat Resources Holdings Ltd.	Mt Cattlin	244.775
									FMC Corp.	Wellington Management Group LLP	173.575						NLG Capital Inc.	USA	135.134		Vanguard Group Inc.	Mt Cattlin	154.437
									FMC Corp.	SailingStone Capital Partners LLC	172.101						Frank Russell Co.	USA	134.583		Qinghai State-owned Assets Investment and Management Co. Ltd.	Chaerhan Lake	139.765
									FMC Corp.	Teachers Insurance and Annuity Association-College Retirement Equities Fund	159.138						Federated Hermes, Inc.	USA	133.54		Sinochem Holdings Corporation Ltd.	Chaerhan Lake	108.049
									Rockwood Holdings Inc.	Brown Advisory Inc.	156.238						Riverbridge Partners LLC	USA	126.582		Capital Research & Mgmt Co.	Salar del Hombre Muerto	1615.21
									Galaxy Resources Ltd.	Vanguard Group Inc.	154.437						Findlay Park Partners LLP	United Kingdom	126.084		BlackRock Inc.	Salar del Hombre Muerto	1176.11
									FMC Corp.	Columbia Wanger Asset Management LLC	151.826						STRS Ohio	USA	124.042		FMR LLC	Salar del Hombre Muerto	972.314
									Rockwood Holdings Inc.	Norges Bank Investment Management	146.051						GE Asset Management Inc.	USA	122.443		Vanguard Group Inc.	Salar del Hombre Muerto	862.061
									Rockwood Holdings Inc.	Two Sigma Investments LP	144.27						Brighthouse Investment Advisers LLC	USA	115.572		State Street Global Advisors Inc.	Salar del Hombre Muerto	588.694
									Qinghai Salt Lake Industry Co.	Qinghai State-owned Assets Investment and Management Co. Ltd.	139.765						Westfield Capital Management Co. L.P.	USA	115.505		JP Morgan Asset Management	Salar del Hombre Muerto	542.711
									Rockwood Holdings Inc.	Serengeti Asset Management LP	139.547						PineBridge Investments LLC	USA	114.651		Cramer Rosenthal McGlynn LLC	Salar del Hombre Muerto	368.523
									Rockwood Holdings Inc.	Denver Investment Advisors LLC	137.58						Aegon Asset Management UK Plc	United Kingdom	113.271		RS Investment Management Co. LLC	Salar del Hombre Muerto	329.593
									Rockwood Holdings Inc.	UBS Asset Management AG	137.463						GAMCO Investors Inc.	USA	111.972		Janus Henderson Investors US LLC	Salar del Hombre Muerto	273.959
									FMC Corp.	BNY Asset Management	137.309						Principal Global Investors LLC	USA	110.365		LSV Asset Management	Salar del Hombre Muerto	269.07
									Rockwood Holdings Inc.	Mackenzie Financial Corp.	135.416						Sinochem Holdings Corporation Ltd.	China	108.049		Luther King Capital Management Corp.	Salar del Hombre Muerto	224.009
									Rockwood Holdings Inc.	NLG Capital Inc.	135.134						Renaissance Technologies LLC	USA	104.865		Sasco Capital Inc.	Salar del Hombre Muerto	213.255
									Sociedad Química y Minera de Chile S.A.	Frank Russell Co.	134.583						Fairpointe Capital LLC	USA	102.67		American Century Investment Management Inc	Salar del Hombre Muerto	199.189
									Rockwood Holdings Inc.	BNY Asset Management	133.952						ClearArc Capital Inc.	USA	100.478		Jennison Associates LLC	Salar del Hombre Muerto	195.759
									Sociedad Química y Minera de Chile S.A.	Federated Hermes, Inc.	133.54										Frontier Capital Management Co LLC	Salar del Hombre Muerto	189.872
									Sociedad Química y Minera de Chile S.A.	State Street Global Advisors Inc.	132.078										Northern Trust Global Investments	Salar del Hombre Muerto	183.454
									Rockwood Holdings Inc.	Teachers Insurance and Annuity Association-College Retirement Equities Fund	128.899										Iridian Asset Management LLC	Salar del Hombre Muerto	177.144
									Rockwood Holdings Inc.	Riverbridge Partners LLC	126.582										Wellington Management Group LLP	Salar del Hombre Muerto	173.575
									FMC Corp.	Findlay Park Partners LLP	126.084										SailingStone Capital Partners LLC	Salar del Hombre Muerto	172.101
									FMC Corp.	STRS Ohio	124.042										Teachers Insurance and Annuity Association-College Retirement Equities Fund	Salar del Hombre Muerto	159.138
									Sociedad Química y Minera de Chile S.A.	GE Asset Management Inc.	122.443										Columbia Wanger Asset Management LLC	Salar del Hombre Muerto	151.826
									Rockwood Holdings Inc.	Northern Trust Global Investments	118.148										BNY Asset Management	Salar del Hombre Muerto	137.309
									Rockwood Holdings Inc.	Brighthouse Investment Advisers LLC	115.572										Findlay Park Partners LLP	Salar del Hombre Muerto	126.084
									FMC Corp.	Westfield Capital Management Co. L.P.	115.505										STRS Ohio	Salar del Hombre Muerto	124.042
									Talison Lithium Ltd.	PineBridge Investments LLC	114.651										Westfield Capital Management Co. L.P.	Salar del Hombre Muerto	115.505
									Talison Lithium Ltd.	Aegon Asset Management UK Plc	113.271										Fairpointe Capital LLC	Salar del Hombre Muerto	102.67
									Rockwood Holdings Inc.	GAMCO Investors Inc.	111.972										Zimbabwe Firms	Bikita	5505
									Sociedad Química y Minera de Chile S.A.	Principal Global Investors LLC	110.365										China Firms	East Taijinair	2970
									Sociedad Química y Minera de Chile S.A.	Columbia Wanger Asset Management LLC	109.961										T. Rowe Price Group Inc.	Silver Peak	512.582
									Qinghai Salt Lake Industry Co.	Sinochem Holdings Corporation Ltd.	108.049										Morgan Stanley Investment Management Inc.	Silver Peak	250.885
									Talison Lithium Ltd.	Jennison Associates LLC	107.773										Atlantic Investment Management Inc.	Silver Peak	246.381
									Rockwood Holdings Inc.	Renaissance Technologies LLC	104.865										Iridian Asset Management LLC	Silver Peak	185.303
									FMC Corp.	Fairpointe Capital LLC	102.67										Vanguard Group Inc.	Silver Peak	172.297
									Rockwood Holdings Inc.	ClearArc Capital Inc.	100.478										Barrow Hanley Mewhinney & Strauss LLC	Silver Peak	160.39
																					BlackRock Inc.	Silver Peak	152.102
																					Jana Partners Management LP	Silver Peak	140.142
																					Cadian Capital Management LP	Silver Peak	119.072
																					Axon Capital LP	Silver Peak	110.458
																					Jiangxi Tungsten Holding Group Co., LTD	Yichun	9787
																					China Firms	Jiajika	4856
																					Tibet Mining Asset Operation Co. Ltd.	Zhabuye	458.525
																					Zhongxin Guoan	West Taijinair	1980
																					Brazil Firms	Cachoeira	606
																					Portugal Firms	Alvarroes	1280

## Sheet: 2013
	Company’s country	Lithium mining companies	Production (t,LCE)		Lithium mining companies	Mines	Production (t,LCE)		Lithium mining companies	Shareholders of lithium companies	Production (t,LCE)		Mine’s country	Mines	Production (t,LCE)		Shareholders of lithium companies	Shareholder’s country	Production (t,LCE)		Shareholders of lithium companies	Mines	Production (t,LCE)
	China	Chengdu Tianqi Industry Grp Co	64174		Chengdu Tianqi Industry Grp Co	Greenbushes	64174		Chengdu Tianqi Industry Grp Co	China Firms	64174		Australia	Greenbushes	64174		China Firms	China	73409		China Firms	Greenbushes	64174
	Chile	Sociedad Química y Minera de Chile S.A.	33000		Sociedad Química y Minera de Chile S.A.	Salar de Atacama1	33000		Sociedad Química y Minera de Chile S.A.	Inversiones SQYA S.A	9867		Chile	Salar de Atacama1	33000		Inversiones SQYA S.A	Chile	9867		Inversiones SQYA S.A	Salar de Atacama1	9867
	USA	Rockwood Holdings Inc.	28400		Rockwood Holdings Inc.	Salar de Atacama2	23800		Sociedad Química y Minera de Chile S.A.	Nutrien Ltd.	8606.94		Chile	Salar de Atacama2	23800		Jiangxi Tungsten Holding Group Co., LTD	China	9787		Jiangxi Tungsten Holding Group Co., LTD	Yichun	9787
	USA	FMC Corp.	13664		FMC Corp.	Salar del Hombre Muerto	13664		Sociedad Química y Minera de Chile S.A.	RS Investment Management Co. LLC	1944.05		Argentina	Salar del Hombre Muerto	13664		Nutrien Ltd.	Canada	8606.94		Nutrien Ltd.	Salar de Atacama1	8606.94
	China	Yichun Tantalum Co Ltd	9787		Yichun Tantalum Co Ltd	Yichun	9787		Sociedad Química y Minera de Chile S.A.	SailingStone Capital Partners LLC	1295.75		China	Yichun	9787		Zimbabwe Firms	Zimbabwe	5193		Zimbabwe Firms	Bikita	5193
	Australia	Galaxy Resources Ltd.	5844		Galaxy Resources Ltd.	Mt Cattlin	5844		Sociedad Química y Minera de Chile S.A.	Baillie Gifford & Co.	691.296		Australia	Mt Cattlin	5844		T. Rowe Price Group Inc.	USA	4729.43		China Firms	East Taijinair	4951
	Zimbabwe	Bikita Minerals (PTY) Ltd	5193		Bikita Minerals (PTY) Ltd	Bikita	5193		Sociedad Química y Minera de Chile S.A.	Vontobel Asset Management Inc.	610.542		Zimbabwe	Bikita	5193		Vanguard Group Inc.	USA	2965.11		China Firms	Jiajika	4284
	China	Western Mining Group Co., Ltd.	4951		Western Mining Group Co., Ltd.	East Taijinair	4951		Sociedad Química y Minera de Chile S.A.	Kowa Company Ltd.	463.083		China	East Taijinair	4951		BlackRock Inc.	USA	2370.37		T. Rowe Price Group Inc.	Salar de Atacama2	3575.44
	China	Sichuan Mineral Industry Co.	4284		Rockwood Holdings Inc.	Silver Peak	4600		Sociedad Química y Minera de Chile S.A.	Fiduciary Management Inc.	412.291		USA	Silver Peak	4600		First Eagle Investment Management LLC	USA	2070.94		Zhongxin Guoan	West Taijinair	1980
	China	Qinghai Zhongxin Guoan Technology development Co., LTD	1980		Sichuan Mineral Industry Co.	Jiajika	4284		Sociedad Química y Minera de Chile S.A.	BlackRock Inc.	345.83		China	Jiajika	4284		Zhongxin Guoan	China	1980		RS Investment Management Co. LLC	Salar de Atacama1	1944.05
	China	Tibet Mineral Dev. Co. LTD	1652		Qinghai Zhongxin Guoan Technology development Co., LTD	West Taijinair	1980		Sociedad Química y Minera de Chile S.A.	Vanguard Group Inc.	326.874		China	West Taijinair	1980		RS Investment Management Co. LLC	USA	1944.05		Tibet Mining Asset Operation Co. Ltd.	Zhabuye	1652
	Portugal	Grupo Mota	1233		Tibet Mineral Dev. Co. LTD	Zhabuye	1652		Sociedad Química y Minera de Chile S.A.	Macquarie Investment Management Business Trust	281.132		China	Zhabuye	1652		Tibet Mining Asset Operation Co. Ltd.	China	1652		First Eagle Investment Management LLC	Salar de Atacama2	1614.52
	China	Qinghai Salt Lake Industry Co.,Ltd	657		Grupo Mota	Alvarroes	1233		Sociedad Química y Minera de Chile S.A.	Columbia Wanger Asset Management LLC	213.867		Portugal	Alvarroes	1233		Capital Research & Mgmt Co.	USA	1557.63		Capital Research & Mgmt Co.	Salar del Hombre Muerto	1557.63
	Brazil	Companhia Brasileira de Lítio	592		Qinghai Salt Lake Industry Co.,Ltd	Chaerhan Lake	657		Sociedad Química y Minera de Chile S.A.	Administradora de Fondos de Pensiones Cuprum SA	197.772		China	Chaerhan Lake	657		Orbis Investment Management Ltd.	USA	1419.94		Vanguard Group Inc.	Salar de Atacama2	1303.1
					Companhia Brasileira de Lítio	Cachoeira	592		Sociedad Química y Minera de Chile S.A.	Sarasin & Partners LLP	179.548		Brazil	Cachoeira	592		Fred Alger Management LLC	USA	1317.59		SailingStone Capital Partners LLC	Salar de Atacama1	1295.75
									Sociedad Química y Minera de Chile S.A.	FOURPOINTS Investment Managers SAS	121.66						SailingStone Capital Partners LLC	USA	1295.75		Portugal Firms	Alvarroes	1233
									Rockwood Holdings Inc.	T. Rowe Price Group Inc.	4266.49						Iridian Asset Management LLC	USA	1258.57		Orbis Investment Management Ltd.	Salar de Atacama2	1189.95
									Rockwood Holdings Inc.	First Eagle Investment Management LLC	1926.58						Portugal Firms	Portugal	1233		Fred Alger Management LLC	Salar de Atacama2	1104.18
									Rockwood Holdings Inc.	Vanguard Group Inc.	1554.96						FMR LLC	USA	1174.96		FMR LLC	Salar del Hombre Muerto	1030.46
									Rockwood Holdings Inc.	Orbis Investment Management Ltd.	1419.94						Barrow Hanley Mewhinney & Strauss LLC	USA	1115.48		Vanguard Group Inc.	Salar del Hombre Muerto	948.282
									Rockwood Holdings Inc.	Fred Alger Management LLC	1317.59						Gates Capital Management Inc.	USA	968.689		BlackRock Inc.	Salar del Hombre Muerto	939.661
									Rockwood Holdings Inc.	Barrow Hanley Mewhinney & Strauss LLC	1115.48						State Street Global Advisors Inc.	USA	890.111		Barrow Hanley Mewhinney & Strauss LLC	Salar de Atacama2	934.807
									Rockwood Holdings Inc.	BlackRock Inc.	1084.88						Pzena Investment Management Inc.	USA	748.355		BlackRock Inc.	Salar de Atacama2	909.16
									Rockwood Holdings Inc.	Gates Capital Management Inc.	968.689						Baillie Gifford & Co.	United Kingdom	691.296		Gates Capital Management Inc.	Salar de Atacama2	811.788
									Rockwood Holdings Inc.	Iridian Asset Management LLC	929.228						PPM America Inc.	USA	660.526		Iridian Asset Management LLC	Salar de Atacama2	778.719
									Rockwood Holdings Inc.	Pzena Investment Management Inc.	748.355						Westwood Management Corp.	USA	628.085		Baillie Gifford & Co.	Salar de Atacama1	691.296
									Rockwood Holdings Inc.	Westwood Management Corp.	628.085						Vontobel Asset Management Inc.	USA	610.542		T. Rowe Price Group Inc.	Silver Peak	691.051
									Rockwood Holdings Inc.	Adage Capital Management LP	456.404						Brazil Firms	Brazil	592		PPM America Inc.	Mt Cattlin	660.526
									Rockwood Holdings Inc.	D.E. Shaw & Co. LP	444.177						Deutsche Bank AG	United Kingdom	497.604		Pzena Investment Management Inc.	Salar de Atacama2	627.143
									Rockwood Holdings Inc.	Strategic Advisers LLC	367.921						Westfield Capital Management Co. L.P.	USA	496.208		State Street Global Advisors Inc.	Salar del Hombre Muerto	616.361
									Rockwood Holdings Inc.	ClearBridge Investments LLC	316.089						M&G Investment Management Ltd.	United Kingdom	491.819		Vontobel Asset Management Inc.	Salar de Atacama1	610.542
									Rockwood Holdings Inc.	Point72 Asset Management LP	306.992						Cramer Rosenthal McGlynn LLC	USA	478.261		Brazil Firms	Cachoeira	592
									Rockwood Holdings Inc.	Westfield Capital Management Co. L.P.	283.561						Kowa Company Ltd.	Japan	463.083		Westwood Management Corp.	Salar de Atacama2	526.353
									Rockwood Holdings Inc.	Invesco Ltd.	278.786						Adage Capital Management LP	USA	456.404		Deutsche Bank AG	Mt Cattlin	497.604
									Rockwood Holdings Inc.	State Street Global Advisors Inc.	273.75						D.E. Shaw & Co. LP	USA	444.177		M&G Investment Management Ltd.	Mt Cattlin	491.819
									Rockwood Holdings Inc.	William Blair Investment Management LLC	263.109						Massachusetts Financial Services Company	USA	427.89		Cramer Rosenthal McGlynn LLC	Salar del Hombre Muerto	478.261
									Rockwood Holdings Inc.	Renaissance Technologies LLC	260.113						Fiduciary Management Inc.	USA	412.291		Kowa Company Ltd.	Salar de Atacama1	463.083
									Rockwood Holdings Inc.	Seifollah Ghasemi	236.211						BNY Asset Management	USA	380.042		T. Rowe Price Group Inc.	Salar del Hombre Muerto	462.939
									Rockwood Holdings Inc.	Bronson Point Management LLC	234.886						Strategic Advisers LLC	USA	367.921		Adage Capital Management LP	Salar de Atacama2	456.404
									Rockwood Holdings Inc.	Millennium Management LLC	220.372						Columbia Wanger Asset Management LLC	USA	354.578		D.E. Shaw & Co. LP	Salar de Atacama2	444.177
									Rockwood Holdings Inc.	Goldman Sachs Group Inc.	204.644						ClearBridge Investments LLC	USA	316.089		Fiduciary Management Inc.	Salar de Atacama1	412.291
									Rockwood Holdings Inc.	Massachusetts Financial Services Company	179.437						Point72 Asset Management LP	USA	306.992		Strategic Advisers LLC	Salar de Atacama2	367.921
									Rockwood Holdings Inc.	Brown Advisory Inc.	174.509						Northern Trust Global Investments	United Kingdom	304.706		BlackRock Inc.	Salar de Atacama1	345.83
									Rockwood Holdings Inc.	Riverbridge Partners LLC	172.495						Macquarie Investment Management Business Trust	USA	281.132		Iridian Asset Management LLC	Salar del Hombre Muerto	329.341
									Rockwood Holdings Inc.	Norges Bank Investment Management	171.135						Invesco Ltd.	USA	278.786		Vanguard Group Inc.	Salar de Atacama1	326.874
									Rockwood Holdings Inc.	Morgan Stanley	160.514						LSV Asset Management	USA	268.147		ClearBridge Investments LLC	Salar de Atacama2	316.089
									Rockwood Holdings Inc.	Sandler Capital Management	157.503						William Blair Investment Management LLC	USA	263.109		First Eagle Investment Management LLC	Silver Peak	312.051
									Rockwood Holdings Inc.	FMR LLC	144.499						Renaissance Technologies LLC	USA	260.113		Point72 Asset Management LP	Salar de Atacama2	306.992
									Rockwood Holdings Inc.	Tourbillon Capital Partners LP	138.358						Jennison Associates LLC	USA	248.198		Westfield Capital Management Co. L.P.	Salar de Atacama2	283.561
									Rockwood Holdings Inc.	Marshall Wace LLP	134.001						Seifollah Ghasemi	USA	236.211		Macquarie Investment Management Business Trust	Salar de Atacama1	281.132
									Rockwood Holdings Inc.	Federated Hermes, Inc.	130.448						Bronson Point Management LLC	USA	234.886		Invesco Ltd.	Salar de Atacama2	278.786
									Rockwood Holdings Inc.	Two Sigma Investments LP	120.618						Frontier Capital Management Co LLC	USA	232.157		State Street Global Advisors Inc.	Salar de Atacama2	273.75
									Rockwood Holdings Inc.	CR Intrinsic Investors LLC	119.052						Luther King Capital Management Corp.	USA	222.964		BNY Asset Management	Salar del Hombre Muerto	270.149
									Rockwood Holdings Inc.	Litespeed Management L.L.C.	116.81						Millennium Management LLC	USA	220.372		LSV Asset Management	Salar del Hombre Muerto	268.147
									Rockwood Holdings Inc.	Geode Capital Management LLC	113.618						Creat Resources Holdings Ltd.	Australia	213.962		William Blair Investment Management LLC	Salar de Atacama2	263.109
									Rockwood Holdings Inc.	BNY Asset Management	109.894						Teachers Insurance and Annuity Association-College Retirement Equities Fund	USA	213.594		Renaissance Technologies LLC	Salar de Atacama2	260.113
									Rockwood Holdings Inc.	Barclays Bank PLC	109.228						Goldman Sachs Group Inc.	USA	204.644		Vanguard Group Inc.	Silver Peak	251.859
									Rockwood Holdings Inc.	Standard Investments LLC	104.503						Sasco Capital Inc.	USA	204.637		Massachusetts Financial Services Company	Salar del Hombre Muerto	248.453
									Rockwood Holdings Inc.	Northern Trust Global Investments	104.01						Qinghai State-owned Assets Investment and Management Co. Ltd.	China	203.604		Jennison Associates LLC	Salar del Hombre Muerto	248.198
									Rockwood Holdings Inc.	Teachers Insurance and Annuity Association-College Retirement Equities Fund	103.004						Administradora de Fondos de Pensiones Cuprum SA	Chile	197.772		Seifollah Ghasemi	Salar de Atacama2	236.211
									Rockwood Holdings Inc.	Allianz Asset Management GmbH	99.8287						Sarasin & Partners LLP	United Kingdom	179.548		Bronson Point Management LLC	Salar de Atacama2	234.886
									Qinghai Salt Lake Industry Co.,Ltd	Qinghai State-owned Assets Investment and Management Co. Ltd.	203.604						Brown Advisory Inc.	USA	174.509		Frontier Capital Management Co LLC	Salar del Hombre Muerto	232.157
									Qinghai Salt Lake Industry Co.,Ltd	Sinochem Holdings Corporation Ltd.	157.402						Riverbridge Partners LLC	USA	172.495		Orbis Investment Management Ltd.	Silver Peak	229.99
									FMC Corp.	Capital Research & Mgmt Co.	1557.63						Norges Bank Investment Management	Norway	171.135		Luther King Capital Management Corp.	Salar del Hombre Muerto	222.964
									FMC Corp.	FMR LLC	1030.46						Morgan Stanley	USA	160.514		Millennium Management LLC	Salar de Atacama2	220.372
									FMC Corp.	Vanguard Group Inc.	948.282						Sandler Capital Management	USA	157.503		Creat Resources Holdings Ltd.	Mt Cattlin	213.962
									FMC Corp.	BlackRock Inc.	939.661						Sinochem Holdings Corporation Ltd.	China	157.402		Columbia Wanger Asset Management LLC	Salar de Atacama1	213.867
									FMC Corp.	State Street Global Advisors Inc.	616.361						American Century Investment Management Inc	USA	155.392		Fred Alger Management LLC	Silver Peak	213.412
									FMC Corp.	Cramer Rosenthal McGlynn LLC	478.261						Tourbillon Capital Partners LP	USA	138.358		Westfield Capital Management Co. L.P.	Salar del Hombre Muerto	212.647
									FMC Corp.	T. Rowe Price Group Inc.	462.939						Marshall Wace LLP	United Kingdom	134.001		Goldman Sachs Group Inc.	Salar de Atacama2	204.644
									FMC Corp.	Iridian Asset Management LLC	329.341						Federated Hermes, Inc.	USA	130.448		Sasco Capital Inc.	Salar del Hombre Muerto	204.637
									FMC Corp.	BNY Asset Management	270.149						Foord Asset Management Guernsey Ltd	United Kingdom	129.78		Qinghai State-owned Assets Investment and Management Co. Ltd.	Chaerhan Lake	203.604
									FMC Corp.	LSV Asset Management	268.147						MultiConcept Fund Management S.A.	Luxembourg	129.78		Northern Trust Global Investments	Salar del Hombre Muerto	200.696
									FMC Corp.	Massachusetts Financial Services Company	248.453						Axon Capital LP	USA	121.958		Administradora de Fondos de Pensiones Cuprum SA	Salar de Atacama1	197.772
									FMC Corp.	Jennison Associates LLC	248.198						FOURPOINTS Investment Managers SAS	France	121.66		Barrow Hanley Mewhinney & Strauss LLC	Silver Peak	180.677
									FMC Corp.	Frontier Capital Management Co LLC	232.157						Two Sigma Investments LP	USA	120.618		Sarasin & Partners LLP	Salar de Atacama1	179.548
									FMC Corp.	Luther King Capital Management Corp.	222.964						CR Intrinsic Investors LLC	USA	119.052		Massachusetts Financial Services Company	Salar de Atacama2	179.437
									FMC Corp.	Westfield Capital Management Co. L.P.	212.647						Litespeed Management L.L.C.	USA	116.81		BlackRock Inc.	Silver Peak	175.72
									FMC Corp.	Sasco Capital Inc.	204.637						Geode Capital Management LLC	USA	113.618		Brown Advisory Inc.	Salar de Atacama2	174.509
									FMC Corp.	Northern Trust Global Investments	200.696						Barclays Bank PLC	United Kingdom	109.228		Riverbridge Partners LLC	Salar de Atacama2	172.495
									FMC Corp.	American Century Investment Management Inc	155.392						Congress Asset Management Co. LLP	USA	107.461		Norges Bank Investment Management	Salar de Atacama2	171.135
									FMC Corp.	First Eagle Investment Management LLC	144.367						Standard Investments LLC	USA	104.503		Morgan Stanley	Salar de Atacama2	160.514
									FMC Corp.	Columbia Wanger Asset Management LLC	140.711						Allianz Asset Management GmbH	Germany	99.8287		Sandler Capital Management	Salar de Atacama2	157.503
									FMC Corp.	Foord Asset Management Guernsey Ltd	129.78										Sinochem Holdings Corporation Ltd.	Chaerhan Lake	157.402
									FMC Corp.	MultiConcept Fund Management S.A.	129.78										Gates Capital Management Inc.	Silver Peak	156.9
									FMC Corp.	Axon Capital LP	121.958										American Century Investment Management Inc	Salar del Hombre Muerto	155.392
									FMC Corp.	Teachers Insurance and Annuity Association-College Retirement Equities Fund	110.589										Iridian Asset Management LLC	Silver Peak	150.509
									FMC Corp.	Congress Asset Management Co. LLP	107.461										FMR LLC	Salar de Atacama2	144.499
									Yichun Tantalum Co Ltd	Jiangxi Tungsten Holding Group Co., LTD	9787										First Eagle Investment Management LLC	Salar del Hombre Muerto	144.367
									Galaxy Resources Ltd.	PPM America Inc.	660.526										Columbia Wanger Asset Management LLC	Salar del Hombre Muerto	140.711
									Galaxy Resources Ltd.	Deutsche Bank AG	497.604										Tourbillon Capital Partners LP	Salar de Atacama2	138.358
									Galaxy Resources Ltd.	M&G Investment Management Ltd.	491.819										Vanguard Group Inc.	Mt Cattlin	134.996
									Galaxy Resources Ltd.	Creat Resources Holdings Ltd.	213.962										Marshall Wace LLP	Salar de Atacama2	134.001
									Galaxy Resources Ltd.	Vanguard Group Inc.	134.996										Federated Hermes, Inc.	Salar de Atacama2	130.448
									Bikita Minerals (PTY) Ltd	Zimbabwe Firms	5193										Foord Asset Management Guernsey Ltd	Salar del Hombre Muerto	129.78
									Western Mining Group Co., Ltd.	China Firms	4951										MultiConcept Fund Management S.A.	Salar del Hombre Muerto	129.78
									Sichuan Mineral Industry Co.	China Firms	4284										Axon Capital LP	Salar del Hombre Muerto	121.958
									Tibet Mineral Dev. Co. LTD	Tibet Mining Asset Operation Co. Ltd.	1652										FOURPOINTS Investment Managers SAS	Salar de Atacama1	121.66
									Qinghai Zhongxin Guoan Technology development Co., LTD	Zhongxin Guoan	1980										Pzena Investment Management Inc.	Silver Peak	121.212
									Companhia Brasileira de Lítio	Brazil Firms	592										Two Sigma Investments LP	Salar de Atacama2	120.618
									Grupo Mota	Portugal Firms	1233										CR Intrinsic Investors LLC	Salar de Atacama2	119.052
																					Litespeed Management L.L.C.	Salar de Atacama2	116.81
																					Geode Capital Management LLC	Salar de Atacama2	113.618
																					Teachers Insurance and Annuity Association-College Retirement Equities Fund	Salar del Hombre Muerto	110.589
																					BNY Asset Management	Salar de Atacama2	109.894
																					Barclays Bank PLC	Salar de Atacama2	109.228
																					Congress Asset Management Co. LLP	Salar del Hombre Muerto	107.461
																					Standard Investments LLC	Salar de Atacama2	104.503
																					Northern Trust Global Investments	Salar de Atacama2	104.01
																					Teachers Insurance and Annuity Association-College Retirement Equities Fund	Salar de Atacama2	103.004
																					Westwood Management Corp.	Silver Peak	101.732
																					Allianz Asset Management GmbH	Salar de Atacama2	99.8287

## Sheet: 2014
	Company’s country	Lithium mining companies	Production (t,LCE)		Lithium mining companies	Mines	Production (t,LCE)		Lithium mining companies	Shareholders of lithium companies	Production (t,LCE)		Mine’s country	Mines	Production (t,LCE)		Shareholders of lithium companies	Shareholder’s country	Production (t,LCE)		Shareholders of lithium companies	Mines	Production (t,LCE)
	USA	Rockwood Holdings Inc.	68111.1		Tianqi Lithium Corporation	Greenbushes	33295.9		Tianqi Lithium Corporation	Chengdu Tianqi Industry Group Co. Ltd.	12171.2		Australia	Greenbushes	65286		Chengdu Tianqi Industry Group Co. Ltd.	China	12171.2		Capital Research and Management Co.	Greenbushes	2199.81
	China	Tianqi Lithium Corporation	33603.7		Rockwood Holdings Inc.	Greenbushes	31990.1		Yichun Tantalum Co Ltd	Jiangxi Tungsten Holding Group Co., LTD	9787		Chile	Salar de Atacama2	31170		Jiangxi Tungsten Holding Group Co., LTD	China	9787		Vanguard Group Inc.	Greenbushes	1909.54
	Chile	Sociedad Química y Minera de Chile S.A.	30000		Rockwood Holdings Inc.	Salar de Atacama2	31170		Sociedad Química y Minera de Chile S.A.	Nutrien Ltd.	9601.48		Chile	Salar de Atacama1	30000		Nutrien Ltd.	Canada	9601.48		Sculptor Capital Management Inc.	Greenbushes	1564.4
	USA	FMC Corp.	18018		Sociedad Química y Minera de Chile S.A.	Salar de Atacama1	30000		Sociedad Química y Minera de Chile S.A.	Inversiones SQYA S.A	8982		Argentina	Salar del Hombre Muerto	18018		Inversiones SQYA S.A	Chile	8982		Morgan Stanley	Greenbushes	1386.23
	China	Yichun Tantalum Co Ltd	9787		FMC Corp.	Salar del Hombre Muerto	18018		Western Mining Group Co., Ltd.	China Firms	5941		China	Yichun	9787		China Firms	China	5941		BlackRock Inc.	Greenbushes	1225.22
	China	Western Mining Group Co., Ltd.	5941		Yichun Tantalum Co Ltd	Yichun	9787		Bikita Minerals (PTY) Ltd	Zimbabwe Firms	5193		China	East Taijinair	5941		Vanguard Group Inc.	USA	5752.83		Farallon Capital Management L.L.C.	Greenbushes	1046.59
	Zimbabwe	Bikita Minerals (PTY) Ltd	5193		Western Mining Group Co., Ltd.	East Taijinair	5941		Rockwood Holdings Inc.	Capital Research and Management Co.	4683.69		Zimbabwe	Bikita	5193		Zimbabwe Firms	Zimbabwe	5193		D.E. Shaw & Co. LP	Greenbushes	993.388
	China	Qinghai Zhongxin Guoan Technology development Co., LTD	1980		Bikita Minerals (PTY) Ltd	Bikita	5193		Rockwood Holdings Inc.	Vanguard Group Inc.	4065.66		USA	Silver Peak	4951		Capital Research and Management Co.	USA	4683.69		TIG Advisors LLC	Greenbushes	978.809
	China	Qinghai Salt Lake Industry Co.,Ltd	1672		Rockwood Holdings Inc.	Silver Peak	4951		Rockwood Holdings Inc.	Sculptor Capital Management Inc.	3330.81		China	West Taijinair	1980		BlackRock Inc.	USA	4231.23		Adage Capital Management LP	Greenbushes	921.004
	China	Tibet Mineral Development Co., LTD	1231.2		Qinghai Zhongxin Guoan Technology development Co., LTD	West Taijinair	1980		Rockwood Holdings Inc.	Morgan Stanley	2951.47		China	Chaerhan Lake	1672		Sculptor Capital Management Inc.	USA	3330.81		AQR Capital Management LLC	Greenbushes	826.8
	Portugal	Grupo Mota	1079		Qinghai Salt Lake Industry Co.,Ltd	Chaerhan Lake	1672		Rockwood Holdings Inc.	BlackRock Inc.	2608.66		China	Zhabuye	1539		Morgan Stanley	USA	2951.47		Bardin Hill Investment Partners LP	Greenbushes	819.619
	Brazil	Companhia Brasileira de Lítio	602		Tibet Mineral Development Co., LTD	Zhabuye	1231.2		Rockwood Holdings Inc.	Farallon Capital Management L.L.C.	2228.33		Portugal	Alvarroes	1079		Farallon Capital Management L.L.C.	USA	2228.33		Gates Capital Management Inc.	Greenbushes	796.754
					Grupo Mota	Alvarroes	1079		FMC Corp.	Capital Research & Mgmt Co.	2132.79		Brazil	Cachoeira	602		Capital Research & Mgmt Co.	USA	2132.79		Alpine Associates Management Inc.	Greenbushes	766.617
					Companhia Brasileira de Lítio	Cachoeira	602		Rockwood Holdings Inc.	D.E. Shaw & Co. LP	2115.05						D.E. Shaw & Co. LP	USA	2115.05		Carlson Capital L.P.	Greenbushes	725.611
					Tianqi Lithium Corporation	Zhabuye	307.8		Rockwood Holdings Inc.	TIG Advisors LLC	2084.01						TIG Advisors LLC	USA	2084.01		Davidson Kempner Capital Management LLC	Greenbushes	703.123
									Qinghai Zhongxin Guoan Technology development Co., LTD	Zhongxin Guoan	1980						Zhongxin Guoan	China	1980		JPMorgan Chase & Co.	Greenbushes	669.031
									Rockwood Holdings Inc.	Adage Capital Management LP	1960.94						Adage Capital Management LP	USA	1960.94		Merrill Lynch Pierce Fenner & Smith Inc.	Greenbushes	649.288
									Tianqi Lithium Corporation	Wei Ping Jiang	1890.09						State Street Global Advisors Inc.	USA	1911.42		Barrow Hanley Mewhinney & Strauss LLC	Greenbushes	590.717
									Sociedad Química y Minera de Chile S.A.	SailingStone Capital Partners LLC	1841.97						Wei Ping Jiang	China	1890.09		State Street Global Advisors Inc.	Greenbushes	574.352
									Tianqi Lithium Corporation	Guo Hua Life Insurance Company Ltd.	1775.82						SailingStone Capital Partners LLC	USA	1841.97		Two Sigma Investments LP	Greenbushes	486.533
									Rockwood Holdings Inc.	AQR Capital Management LLC	1760.36						Guo Hua Life Insurance Company Ltd.	China	1775.82		Water Island Capital LLC	Greenbushes	479.158
									Tianqi Lithium Corporation	New China Life Insurance Co. Ltd.	1750.09						AQR Capital Management LLC	USA	1760.36		Pzena Investment Management Inc.	Greenbushes	423.168
									Rockwood Holdings Inc.	Bardin Hill Investment Partners LP	1745.08						New China Life Insurance Co. Ltd.	China	1750.09		Credit Suisse Group AG	Greenbushes	414.852
									Tianqi Lithium Corporation	Tibet RuiHua Capital Management Co. Ltd.	1737.22						Bardin Hill Investment Partners LP	USA	1745.08		Westfield Capital Management Co. L.P.	Greenbushes	332.228
									Rockwood Holdings Inc.	Gates Capital Management Inc.	1696.39						Tibet RuiHua Capital Management Co. Ltd.	China	1737.22		Verition Fund Management LLC	Greenbushes	326.282
									Rockwood Holdings Inc.	Alpine Associates Management Inc.	1632.23						Gates Capital Management Inc.	USA	1696.39		UBS O'Connor LLC	Greenbushes	324.708
									Rockwood Holdings Inc.	Carlson Capital L.P.	1544.92						FMR LLC	USA	1665.17		UBS Asset Management AG	Greenbushes	321.944
									FMC Corp.	FMR LLC	1531.68						Alpine Associates Management Inc.	USA	1632.23		Seifollah Ghasemi	Greenbushes	319.678
									Rockwood Holdings Inc.	Davidson Kempner Capital Management LLC	1497.04						Carlson Capital L.P.	USA	1544.92		Westwood Management Corp.	Greenbushes	312.275
									Rockwood Holdings Inc.	JPMorgan Chase & Co.	1424.45						Barrow Hanley Mewhinney & Strauss LLC	USA	1522.4		New Jersey Division of Investment	Greenbushes	298.705
									FMC Corp.	Vanguard Group Inc.	1385.58						Davidson Kempner Capital Management LLC	USA	1497.04		Two Sigma Advisers LP	Greenbushes	292.859
									Rockwood Holdings Inc.	Merrill Lynch Pierce Fenner & Smith Inc.	1382.42						JPMorgan Chase & Co.	USA	1424.45		Goldman Sachs Group Inc.	Greenbushes	272.269
									Tianqi Lithium Corporation	Ping An Asset Management Co. Ltd.	1344.73						Merrill Lynch Pierce Fenner & Smith Inc.	USA	1382.42		Capstone Investment Advisors LLC	Greenbushes	259.894
									FMC Corp.	BlackRock Inc.	1304.43						Ping An Asset Management Co. Ltd.	China	1344.73		Norges Bank Investment Management	Greenbushes	245.173
									Tianqi Lithium Corporation	China Universal Asset Management Co. Ltd.	1273.96						China Universal Asset Management Co. Ltd.	China	1273.96		GAMCO Investors Inc.	Greenbushes	236.067
									Rockwood Holdings Inc.	Barrow Hanley Mewhinney & Strauss LLC	1166.29						PortugalFirms	Portugal	1079		BTG Pactual Global Asset Management Ltd.	Greenbushes	226.433
									Rockwood Holdings Inc.	State Street Global Advisors Inc.	1133.98						Two Sigma Investments LP	USA	960.594		Deutsche Bank AG	Greenbushes	218.894
									Grupo Mota	PortugalFirms	1079						Water Island Capital LLC	USA	946.032		Citigroup Inc.	Greenbushes	200.851
									Rockwood Holdings Inc.	Two Sigma Investments LP	960.594						Pzena Investment Management Inc.	USA	835.486		Brown Advisory Inc.	Greenbushes	193.671
									Rockwood Holdings Inc.	Water Island Capital LLC	946.032						Credit Suisse Group AG	Switzerland	819.069		Alberta Investment Management Corp.	Greenbushes	186.082
									Rockwood Holdings Inc.	Pzena Investment Management Inc.	835.486						AEGON-Industrial Fund Mgmt Co.	China	773.383		Barclays Bank PLC	Greenbushes	181.248
									Rockwood Holdings Inc.	Credit Suisse Group AG	819.069						Aegon-Industrial Target Season New Issue No.41 Classification Specific Multi-Cli	China	741.213		Ascend Capital LLC	Greenbushes	175.676
									FMC Corp.	State Street Global Advisors Inc.	777.442						Shanghai Chaos Investment (Group) Co., Ltd.	China	669.15		Geode Capital Management LLC	Greenbushes	173.917
									Tianqi Lithium Corporation	AEGON-Industrial Fund Mgmt Co.	773.383						Westfield Capital Management Co. L.P.	USA	655.938		OMERS Administration Corp.	Greenbushes	166.781
									Tianqi Lithium Corporation	Aegon-Industrial Target Season New Issue No.41 Classification Specific Multi-Cli	741.213						China Southern Asset Management Co. Ltd.	China	653.734		Teachers Insurance and Annuity Association-College Retirement Equities Fund	Greenbushes	150.038
									Tianqi Lithium Corporation	Shanghai Chaos Investment (Group) Co., Ltd.	669.15						Verition Fund Management LLC	USA	644.2		Gabelli & Co. Investment Advisers Inc.	Greenbushes	148.364
									Rockwood Holdings Inc.	Westfield Capital Management Co. L.P.	655.938						UBS O'Connor LLC	USA	641.092		Alyeska Investment Group L.P.	Greenbushes	146.902
									Tianqi Lithium Corporation	China Southern Asset Management Co. Ltd.	653.734						UBS Asset Management AG	Switzerland	635.634		Dimensional Fund Advisors LP	Greenbushes	141.561
									Rockwood Holdings Inc.	Verition Fund Management LLC	644.2						Seifollah Ghasemi	USA	631.16		Visium Asset Management LP	Greenbushes	140.222
									Rockwood Holdings Inc.	UBS O'Connor LLC	641.092						Westwood Management Corp.	USA	616.544		BNY Asset Management	Greenbushes	137.859
									Rockwood Holdings Inc.	UBS Asset Management AG	635.634						Norges Bank Investment Management	Norway	613.529		P. Schoenfeld Asset Management LP	Greenbushes	135.08
									Rockwood Holdings Inc.	Seifollah Ghasemi	631.16						Baillie Gifford & Co.	United Kingdom	608.014		Northern Trust Global Investments	Greenbushes	127.821
									Rockwood Holdings Inc.	Westwood Management Corp.	616.544						Brazil Firms	Brazil	602		Gardner Lewis Asset Management LP	Greenbushes	125.521
									Sociedad Química y Minera de Chile S.A.	Baillie Gifford & Co.	608.014						New Jersey Division of Investment	USA	589.753		Jefferies Group LLC	Greenbushes	119.484
									Companhia Brasileira de Lítio	Brazil Firms	602						Select Equity Group L.P.	USA	587.454		ClearBridge Investments LLC	Greenbushes	118.542
									Rockwood Holdings Inc.	New Jersey Division of Investment	589.753						Two Sigma Advisers LP	USA	578.21		W. R. Berkley Corp.	Greenbushes	116.403
									FMC Corp.	Select Equity Group L.P.	587.454						Jennison Associates LLC	USA	563.193		BlueCrest Capital Management Ltd.	Greenbushes	112.811
									Rockwood Holdings Inc.	Two Sigma Advisers LP	578.21						Goldman Sachs Group Inc.	USA	537.558		BBT Capital Management LLC	Greenbushes	112.295
									FMC Corp.	Jennison Associates LLC	563.193						Qinghai State-owned Assets Investment and Management Co. Ltd.	China	518.153		Credit Suisse Asset Management (Switzerland) Ltd.	Greenbushes	108.886
									Rockwood Holdings Inc.	Goldman Sachs Group Inc.	537.558						Capstone Investment Advisors LLC	USA	513.126		Glazer Capital LLC	Greenbushes	108.583
									Qinghai Salt Lake Industry Co.,Ltd	Qinghai State-owned Assets Investment and Management Co. Ltd.	518.153						Northern Trust Global Investments	United Kingdom	493.332		Good Hill Partners LP	Greenbushes	107.593
									Rockwood Holdings Inc.	Capstone Investment Advisors LLC	513.126						BNY Asset Management	USA	485.882		Longfellow Investment Management Co. LLC	Greenbushes	105.692
									Rockwood Holdings Inc.	Norges Bank Investment Management	484.06						Geode Capital Management LLC	USA	475.202		Massachusetts Financial Services Company	Greenbushes	102.694
									Rockwood Holdings Inc.	GAMCO Investors Inc.	466.082						GAMCO Investors Inc.	USA	466.082		Vertex One Asset Management Inc.	Greenbushes	102.006
									FMC Corp.	Fairpointe Capital LLC	457.188						Fairpointe Capital LLC	USA	457.188		Chengdu Tianqi Industry Group Co. Ltd.	Greenbushes	12059.8
									Sociedad Química y Minera de Chile S.A.	Fiduciary Management Inc.	453.194						Fiduciary Management Inc.	USA	453.194		Wei Ping Jiang	Greenbushes	1890.09
									Rockwood Holdings Inc.	BTG Pactual Global Asset Management Ltd.	447.061						Teachers Insurance and Annuity Association-College Retirement Equities Fund	USA	450.39		Guo Hua Life Insurance Company Ltd.	Greenbushes	1775.82
									Rockwood Holdings Inc.	Deutsche Bank AG	432.176						BTG Pactual Global Asset Management Ltd.	Bermuda	447.061		New China Life Insurance Co. Ltd.	Greenbushes	1750.09
									Sociedad Química y Minera de Chile S.A.	Kowa Company Ltd.	423.125						Deutsche Bank AG	United Kingdom	432.176		Tibet RuiHua Capital Management Co. Ltd.	Greenbushes	1737.22
									Sociedad Química y Minera de Chile S.A.	Manning & Napier Advisors LLC	406.424						Kowa Company Ltd.	Japan	423.125		Ping An Asset Management Co. Ltd.	Greenbushes	1344.73
									Qinghai Salt Lake Industry Co.,Ltd	Sinochem Holdings Corporation Ltd.	400.573						Manning & Napier Advisors LLC	USA	406.424		China Universal Asset Management Co. Ltd.	Greenbushes	1273.96
									Rockwood Holdings Inc.	Citigroup Inc.	396.552						Sinochem Holdings Corporation Ltd.	China	400.573		AEGON-Industrial Fund Mgmt Co.	Greenbushes	773.383
									Rockwood Holdings Inc.	Brown Advisory Inc.	382.376						Citigroup Inc.	USA	396.552		Aegon-Industrial Target Season New Issue No.41 Classification Specific Multi-Cli	Greenbushes	741.213
									Rockwood Holdings Inc.	Alberta Investment Management Corp.	367.393						Brown Advisory Inc.	USA	382.376		Shanghai Chaos Investment (Group) Co., Ltd.	Greenbushes	669.15
									FMC Corp.	Cramer Rosenthal McGlynn LLC	360.352						Alberta Investment Management Corp.	Canada	367.393		China Southern Asset Management Co. Ltd.	Greenbushes	653.734
									Rockwood Holdings Inc.	Barclays Bank PLC	357.849						Cramer Rosenthal McGlynn LLC	USA	360.352		National Council for Social Security Fund	Greenbushes	323.321
									FMC Corp.	Barrow Hanley Mewhinney & Strauss LLC	356.111						Barclays Bank PLC	United Kingdom	357.849		Yinhua Fund Management Co. Ltd.	Greenbushes	257.338
									FMC Corp.	LSV Asset Management	352.495						LSV Asset Management	USA	352.495		Shenzhen Qianyuan Investment Co., Ltd.	Greenbushes	237.42
									FMC Corp.	River Road Asset Management LLC	347.672						River Road Asset Management LLC	USA	347.672		China Asset Management Co. Ltd.	Greenbushes	198.566
									Rockwood Holdings Inc.	Ascend Capital LLC	346.847						Ascend Capital LLC	USA	346.847		Fullgoal Fund Management Co. Ltd.	Greenbushes	161.666
									Rockwood Holdings Inc.	Geode Capital Management LLC	343.374						Sasco Capital Inc.	USA	339.991		Bank of China Investment Management Co. Ltd.	Greenbushes	105.549
									FMC Corp.	Sasco Capital Inc.	339.991						OMERS Administration Corp.	Canada	329.286		Kuwait Investment Authority	Greenbushes	101.132
									Rockwood Holdings Inc.	OMERS Administration Corp.	329.286						Litespeed Management L.L.C.	USA	325.644		Nutrien Ltd.	Salar de Atacama1	9601.48
									FMC Corp.	Litespeed Management L.L.C.	325.644						National Council for Social Security Fund	China	323.321		Inversiones SQYA S.A	Salar de Atacama1	8982
									Tianqi Lithium Corporation	National Council for Social Security Fund	323.321						Luther King Capital Management Corp.	USA	305.195		SailingStone Capital Partners LLC	Salar de Atacama1	1841.97
									Sociedad Química y Minera de Chile S.A.	BlackRock Inc.	318.142						Gabelli & Co. Investment Advisers Inc.	USA	292.925		Baillie Gifford & Co.	Salar de Atacama1	608.014
									FMC Corp.	Luther King Capital Management Corp.	305.195						Alyeska Investment Group L.P.	USA	290.038		Fiduciary Management Inc.	Salar de Atacama1	453.194
									Sociedad Química y Minera de Chile S.A.	Vanguard Group Inc.	301.588						Foord Asset Management Guernsey Ltd	United Kingdom	281.885		Kowa Company Ltd.	Salar de Atacama1	423.125
									Rockwood Holdings Inc.	Teachers Insurance and Annuity Association-College Retirement Equities Fund	296.229						MultiConcept Fund Management S.A.	Luxembourg	281.885		Manning & Napier Advisors LLC	Salar de Atacama1	406.424
									Rockwood Holdings Inc.	Gabelli & Co. Investment Advisers Inc.	292.925						Dimensional Fund Advisors LP	USA	279.493		BlackRock Inc.	Salar de Atacama1	318.142
									Rockwood Holdings Inc.	Alyeska Investment Group L.P.	290.038						Visium Asset Management LP	USA	276.849		Vanguard Group Inc.	Salar de Atacama1	301.588
									FMC Corp.	Foord Asset Management Guernsey Ltd	281.885						Sarasin & Partners LLP	United Kingdom	268.381		Sarasin & Partners LLP	Salar de Atacama1	268.381
									FMC Corp.	MultiConcept Fund Management S.A.	281.885						P. Schoenfeld Asset Management LP	USA	266.698		Abrdn Holdings Limited	Salar de Atacama1	244.686
									Rockwood Holdings Inc.	Dimensional Fund Advisors LP	279.493						Yinhua Fund Management Co. Ltd.	China	257.338		Macquarie Investment Management Business Trust	Salar de Atacama1	236.256
									Rockwood Holdings Inc.	Visium Asset Management LP	276.849						Gardner Lewis Asset Management LP	USA	247.825		Administradora de Fondos de Pensiones Cuprum SA	Salar de Atacama1	179.849
									Rockwood Holdings Inc.	BNY Asset Management	272.185						Abrdn Holdings Limited	United Kingdom	244.686		FMR LLC	Salar de Atacama1	133.497
									Sociedad Química y Minera de Chile S.A.	Sarasin & Partners LLP	268.381						Shenzhen Qianyuan Investment Co., Ltd.	China	237.42		Columbia Wanger Asset Management LLC	Salar de Atacama1	128.121
									Rockwood Holdings Inc.	P. Schoenfeld Asset Management LP	266.698						Macquarie Investment Management Business Trust	USA	236.256		Capital Research and Management Co.	Salar de Atacama2	2143.42
									Tianqi Lithium Corporation	Yinhua Fund Management Co. Ltd.	257.338						Jefferies Group LLC	USA	235.906		Vanguard Group Inc.	Salar de Atacama2	1860.58
									Rockwood Holdings Inc.	Northern Trust Global Investments	252.364						ClearBridge Investments LLC	USA	234.045		Sculptor Capital Management Inc.	Salar de Atacama2	1524.29
									Rockwood Holdings Inc.	Gardner Lewis Asset Management LP	247.825						American Century Investment Management Inc	USA	230.976		Morgan Stanley	Salar de Atacama2	1350.7
									Sociedad Química y Minera de Chile S.A.	Abrdn Holdings Limited	244.686						W. R. Berkley Corp.	USA	229.823		BlackRock Inc.	Salar de Atacama2	1193.81
									FMC Corp.	Northern Trust Global Investments	240.967						BlueCrest Capital Management Ltd.	United Kingdom	222.73		Farallon Capital Management L.L.C.	Salar de Atacama2	1019.76
									Tianqi Lithium Corporation	Shenzhen Qianyuan Investment Co., Ltd.	237.42						BBT Capital Management LLC	USA	221.712		D.E. Shaw & Co. LP	Salar de Atacama2	967.921
									Sociedad Química y Minera de Chile S.A.	Macquarie Investment Management Business Trust	236.256						Tibet Mining Asset Operation Co. Ltd.	China	217.799		TIG Advisors LLC	Salar de Atacama2	953.715
									Rockwood Holdings Inc.	Jefferies Group LLC	235.906						Credit Suisse Asset Management (Switzerland) Ltd.	Switzerland	214.98		Adage Capital Management LP	Salar de Atacama2	897.392
									Rockwood Holdings Inc.	ClearBridge Investments LLC	234.045						Glazer Capital LLC	USA	214.382		AQR Capital Management LLC	Salar de Atacama2	805.603
									FMC Corp.	American Century Investment Management Inc	230.976						Good Hill Partners LP	USA	212.428		Bardin Hill Investment Partners LP	Salar de Atacama2	798.606
									Rockwood Holdings Inc.	W. R. Berkley Corp.	229.823						Citadel Advisors LLC	USA	210.279		Gates Capital Management Inc.	Salar de Atacama2	776.328
									Rockwood Holdings Inc.	BlueCrest Capital Management Ltd.	222.73						Longfellow Investment Management Co. LLC	USA	208.675		Alpine Associates Management Inc.	Salar de Atacama2	746.963
									Rockwood Holdings Inc.	BBT Capital Management LLC	221.712						Massachusetts Financial Services Company	USA	202.756		Carlson Capital L.P.	Salar de Atacama2	707.008
									Tibet Mineral Development Co., LTD	Tibet Mining Asset Operation Co. Ltd.	217.799						China Asset Management Co. Ltd.	China	198.566		Davidson Kempner Capital Management LLC	Salar de Atacama2	685.097
									Rockwood Holdings Inc.	Credit Suisse Asset Management (Switzerland) Ltd.	214.98						Atlantic Investment Management Inc.	USA	189.976		JPMorgan Chase & Co.	Salar de Atacama2	651.879
									Rockwood Holdings Inc.	Glazer Capital LLC	214.382						Administradora de Fondos de Pensiones Cuprum SA	Chile	179.849		Merrill Lynch Pierce Fenner & Smith Inc.	Salar de Atacama2	632.642
									FMC Corp.	BNY Asset Management	213.697						Fullgoal Fund Management Co. Ltd.	China	161.666		Barrow Hanley Mewhinney & Strauss LLC	Salar de Atacama2	575.573
									Rockwood Holdings Inc.	Good Hill Partners LP	212.428						Perkins Investment Management LLC	USA	138.866		State Street Global Advisors Inc.	Salar de Atacama2	559.627
									FMC Corp.	Citadel Advisors LLC	210.279						Columbia Wanger Asset Management LLC	USA	128.121		Two Sigma Investments LP	Salar de Atacama2	474.06
									Rockwood Holdings Inc.	Longfellow Investment Management Co. LLC	208.675						China Cinda Asset Management Co. Ltd.	China	121.63		Water Island Capital LLC	Salar de Atacama2	466.874
									Rockwood Holdings Inc.	Massachusetts Financial Services Company	202.756						Neuberger Berman BD LLC prior to change in line of business	USA	114.17		Pzena Investment Management Inc.	Salar de Atacama2	412.319
									Tianqi Lithium Corporation	China Asset Management Co. Ltd.	198.566						Metropolitan West Capital Management LLC	USA	109.942		Credit Suisse Group AG	Salar de Atacama2	404.217
									FMC Corp.	Atlantic Investment Management Inc.	189.976						Bank of China Investment Management Co. Ltd.	China	105.549		Westfield Capital Management Co. L.P.	Salar de Atacama2	323.71
									Sociedad Química y Minera de Chile S.A.	Administradora de Fondos de Pensiones Cuprum SA	179.849						Vertex One Asset Management Inc.	Canada	102.006		Verition Fund Management LLC	Salar de Atacama2	317.917
									Tianqi Lithium Corporation	Fullgoal Fund Management Co. Ltd.	161.666						Kuwait Investment Authority	Kuwait	101.132		UBS O'Connor LLC	Salar de Atacama2	316.384
									FMC Corp.	Teachers Insurance and Annuity Association-College Retirement Equities Fund	154.161										UBS Asset Management AG	Salar de Atacama2	313.69
									FMC Corp.	Perkins Investment Management LLC	138.866										Seifollah Ghasemi	Salar de Atacama2	311.482
									Sociedad Química y Minera de Chile S.A.	FMR LLC	133.497										Westwood Management Corp.	Salar de Atacama2	304.269
									FMC Corp.	Geode Capital Management LLC	131.828										New Jersey Division of Investment	Salar de Atacama2	291.047
									FMC Corp.	Norges Bank Investment Management	129.469										Two Sigma Advisers LP	Salar de Atacama2	285.351
									Sociedad Química y Minera de Chile S.A.	Columbia Wanger Asset Management LLC	128.121										Goldman Sachs Group Inc.	Salar de Atacama2	265.289
									Qinghai Salt Lake Industry Co.,Ltd	China Cinda Asset Management Co. Ltd.	121.63										Capstone Investment Advisors LLC	Salar de Atacama2	253.231
									FMC Corp.	Neuberger Berman BD LLC prior to change in line of business	114.17										Norges Bank Investment Management	Salar de Atacama2	238.887
									FMC Corp.	Metropolitan West Capital Management LLC	109.942										GAMCO Investors Inc.	Salar de Atacama2	230.015
									Tianqi Lithium Corporation	Bank of China Investment Management Co. Ltd.	105.549										BTG Pactual Global Asset Management Ltd.	Salar de Atacama2	220.628
									Rockwood Holdings Inc.	Vertex One Asset Management Inc.	102.006										Deutsche Bank AG	Salar de Atacama2	213.282
									Tianqi Lithium Corporation	Kuwait Investment Authority	101.132										Citigroup Inc.	Salar de Atacama2	195.702
																					Brown Advisory Inc.	Salar de Atacama2	188.705
																					Alberta Investment Management Corp.	Salar de Atacama2	181.311
																					Barclays Bank PLC	Salar de Atacama2	176.601
																					Ascend Capital LLC	Salar de Atacama2	171.172
																					Geode Capital Management LLC	Salar de Atacama2	169.458
																					OMERS Administration Corp.	Salar de Atacama2	162.505
																					Teachers Insurance and Annuity Association-College Retirement Equities Fund	Salar de Atacama2	146.191
																					Gabelli & Co. Investment Advisers Inc.	Salar de Atacama2	144.561
																					Alyeska Investment Group L.P.	Salar de Atacama2	143.136
																					Dimensional Fund Advisors LP	Salar de Atacama2	137.932
																					Visium Asset Management LP	Salar de Atacama2	136.627
																					BNY Asset Management	Salar de Atacama2	134.325
																					P. Schoenfeld Asset Management LP	Salar de Atacama2	131.617
																					Northern Trust Global Investments	Salar de Atacama2	124.544
																					Gardner Lewis Asset Management LP	Salar de Atacama2	122.303
																					Jefferies Group LLC	Salar de Atacama2	116.421
																					ClearBridge Investments LLC	Salar de Atacama2	115.503
																					W. R. Berkley Corp.	Salar de Atacama2	113.419
																					BlueCrest Capital Management Ltd.	Salar de Atacama2	109.919
																					BBT Capital Management LLC	Salar de Atacama2	109.416
																					Credit Suisse Asset Management (Switzerland) Ltd.	Salar de Atacama2	106.094
																					Glazer Capital LLC	Salar de Atacama2	105.799
																					Good Hill Partners LP	Salar de Atacama2	104.835
																					Longfellow Investment Management Co. LLC	Salar de Atacama2	102.983
																					Massachusetts Financial Services Company	Salar de Atacama2	100.062
																					Qinghai State-owned Assets Investment and Management Co. Ltd.	Chaerhan Lake	518.153
																					Sinochem Holdings Corporation Ltd.	Chaerhan Lake	400.573
																					China Cinda Asset Management Co. Ltd.	Chaerhan Lake	121.63
																					Capital Research & Mgmt Co.	Salar del Hombre Muerto	2132.79
																					FMR LLC	Salar del Hombre Muerto	1531.68
																					Vanguard Group Inc.	Salar del Hombre Muerto	1385.58
																					BlackRock Inc.	Salar del Hombre Muerto	1304.43
																					State Street Global Advisors Inc.	Salar del Hombre Muerto	777.442
																					Select Equity Group L.P.	Salar del Hombre Muerto	587.454
																					Jennison Associates LLC	Salar del Hombre Muerto	563.193
																					Fairpointe Capital LLC	Salar del Hombre Muerto	457.188
																					Cramer Rosenthal McGlynn LLC	Salar del Hombre Muerto	360.352
																					Barrow Hanley Mewhinney & Strauss LLC	Salar del Hombre Muerto	356.111
																					LSV Asset Management	Salar del Hombre Muerto	352.495
																					River Road Asset Management LLC	Salar del Hombre Muerto	347.672
																					Sasco Capital Inc.	Salar del Hombre Muerto	339.991
																					Litespeed Management L.L.C.	Salar del Hombre Muerto	325.644
																					Luther King Capital Management Corp.	Salar del Hombre Muerto	305.195
																					Foord Asset Management Guernsey Ltd	Salar del Hombre Muerto	281.885
																					MultiConcept Fund Management S.A.	Salar del Hombre Muerto	281.885
																					Northern Trust Global Investments	Salar del Hombre Muerto	240.967
																					American Century Investment Management Inc	Salar del Hombre Muerto	230.976
																					BNY Asset Management	Salar del Hombre Muerto	213.697
																					Citadel Advisors LLC	Salar del Hombre Muerto	210.279
																					Atlantic Investment Management Inc.	Salar del Hombre Muerto	189.976
																					Teachers Insurance and Annuity Association-College Retirement Equities Fund	Salar del Hombre Muerto	154.161
																					Perkins Investment Management LLC	Salar del Hombre Muerto	138.866
																					Geode Capital Management LLC	Salar del Hombre Muerto	131.828
																					Norges Bank Investment Management	Salar del Hombre Muerto	129.469
																					Neuberger Berman BD LLC prior to change in line of business	Salar del Hombre Muerto	114.17
																					Metropolitan West Capital Management LLC	Salar del Hombre Muerto	109.942
																					Jiangxi Tungsten Holding Group Co., LTD	Yichun	9787
																					Zimbabwe Firms	Bikita	5193
																					China Firms	East Taijinair	5941
																					Capital Research and Management Co.	Silver Peak	340.457
																					Vanguard Group Inc.	Silver Peak	295.533
																					Sculptor Capital Management Inc.	Silver Peak	242.116
																					Morgan Stanley	Silver Peak	214.543
																					BlackRock Inc.	Silver Peak	189.623
																					Farallon Capital Management L.L.C.	Silver Peak	161.977
																					D.E. Shaw & Co. LP	Silver Peak	153.743
																					TIG Advisors LLC	Silver Peak	151.487
																					Adage Capital Management LP	Silver Peak	142.54
																					AQR Capital Management LLC	Silver Peak	127.961
																					Bardin Hill Investment Partners LP	Silver Peak	126.85
																					Gates Capital Management Inc.	Silver Peak	123.311
																					Alpine Associates Management Inc.	Silver Peak	118.647
																					Carlson Capital L.P.	Silver Peak	112.3
																					Davidson Kempner Capital Management LLC	Silver Peak	108.82
																					JPMorgan Chase & Co.	Silver Peak	103.544
																					Merrill Lynch Pierce Fenner & Smith Inc.	Silver Peak	100.488
																					Tibet Mining Asset Operation Co. Ltd.	Zhabuye	217.799
																					Chengdu Tianqi Industry Group Co. Ltd.	Zhabuye	111.485
																					Zhongxin Guoan	West Taijinair	1980
																					Brazil Firms	Cachoeira	602
																					PortugalFirms	Alvarroes	1079

## Sheet: 2015
	Company’s country	Lithium mining companies	Production (t,LCE)		Lithium mining companies	Mines	Production (t,LCE)		Lithium mining companies	Shareholders of lithium companies	Production (t,LCE)		Mine’s country	Mines	Production (t,LCE)		Shareholders of lithium companies	Shareholder’s country	Production (t,LCE)		Shareholders of lithium companies	Mines	Production (t,LCE)
	USA	Albemarle Corporation	72381.5		Tianqi Lithium Corporation	Greenbushes	44446.5		Albemarle Corporation	Capital Research & Mgmt Co.	8839.53		Australia	Greenbushes	87150		Chengdu Tianqi Industry Group Co. Ltd.	China	16538		Chengdu Tianqi Industry Group Co. Ltd.	Greenbushes	15929.6
	China	Tianqi Lithium Corporation	45054.9		Albemarle Corporation	Greenbushes	42703.5		Albemarle Corporation	BlackRock Inc.	6635.56		Chile	Salar de Atacama1	33000		China Firms	China	11268.8		Nutrien Ltd.	Salar de Atacama1	10558.3
	Chile	Sociedad Química y Minera de Chile S.A.	33000		Sociedad Química y Minera de Chile S.A.	Salar de Atacama1	33000		Albemarle Corporation	Vanguard Group Inc.	5508.23		Chile	Salar de Atacama2	24268		Capital Research & Mgmt Co.	USA	10972.9		Inversiones SQYA S.A	Salar de Atacama1	9886.8
	USA	FMC Corp.	17411		Albemarle Corporation	Salar de Atacama2	24268		Albemarle Corporation	Franklin Resources Inc.	5271.31		Argentina	Salar del Hombre Muerto	17411		Nutrien Ltd.	Canada	10558.3		Jiangxi Tungsten Holding Group Co., LTD	Yichun	9787
	China	Yichun Tantalum Co Ltd	9787		FMC Corp.	Salar del Hombre Muerto	17411		Albemarle Corporation	Teachers Insurance and Annuity Association-College Retirement Equities Fund	4455.89		Argentina	Cauchari-Olaroz	10000		Inversiones SQYA S.A	Chile	9886.8		China Firms	East Taijinair	7426
	Canada	Lithium Americas (Argentina) Corp.	9150		Yichun Tantalum Co Ltd	Yichun	9787		Albemarle Corporation	State Street Global Advisors Inc.	4089.98		China	Yichun	9787		Jiangxi Tungsten Holding Group Co., LTD	China	9787		Capital Research & Mgmt Co.	Greenbushes	5215.13
	China	Western Mining Group Co., Ltd.	7426		Lithium Americas (Argentina) Corp.	Cauchari-Olaroz	9150		Albemarle Corporation	FMR LLC	3084.26		China	East Taijinair	7426		BlackRock Inc.	USA	8176.91		BlackRock Inc.	Greenbushes	3914.83
	China	Sinomine International Exploration (Hong Kong) Co. Ltd.	3842.82		Western Mining Group Co., Ltd.	East Taijinair	7426		Albemarle Corporation	JP Morgan Asset Management	1898.13		USA	Silver Peak	5410		Vanguard Group Inc.	USA	7340.36		China Firms	Bikita	3842.82
	China	Qinghai Salt Lake Industry Co.,Ltd	3631		Albemarle Corporation	Silver Peak	5410		Albemarle Corporation	Systematic Financial Management LP	1685.87		Zimbabwe	Bikita	5193		Franklin Resources Inc.	USA	5271.31		Vanguard Group Inc.	Greenbushes	3249.74
	China	Qinghai Zhongxin Guoan Technology development Co., LTD	2475		Sinomine International Exploration (Hong Kong) Co. Ltd.	Bikita	3842.82		Albemarle Corporation	Columbia Management Investment Advisers LLC	1644.3		China	Chaerhan Lake	3631		State Street Global Advisors Inc.	USA	4813.07		Franklin Resources Inc.	Greenbushes	3109.96
	China	Tibet Mineral Development Co., LTD	2433.6		Qinghai Salt Lake Industry Co.,Ltd	Chaerhan Lake	3631		Albemarle Corporation	ClearBridge LLC	1009.88		China	Zhabuye	3042		Teachers Insurance and Annuity Association-College Retirement Equities Fund	USA	4455.89		SailingStone Capital Partners LLC	Salar de Atacama1	3042.9
	Australia	Allkem Limited	1142.47		Qinghai Zhongxin Guoan Technology development Co., LTD	West Taijinair	2475		Albemarle Corporation	Massachusetts Financial Services Company	909.322		China	West Taijinair	2475		FMR LLC	USA	3809.75		Capital Research & Mgmt Co.	Salar de Atacama2	2963.71
	Portugal	Grupo Mota	1058		Tibet Mineral Development Co., LTD	Zhabuye	2433.6		Albemarle Corporation	BNY Asset Management	781.637		Argentina	Salar de Olaroz	1718		SailingStone Capital Partners LLC	USA	3042.9		Teachers Insurance and Annuity Association-College Retirement Equities Fund	Greenbushes	2628.88
	Argentina	Jujuy Energia y Mineria Sociedad del Estado	996.03		Allkem Limited	Salar de Olaroz	1142.47		Albemarle Corporation	Stelliam Investment Management LP	775.423		Portugal	Alvarroes	1058		Zhongxin Guoan	China	2475		Zhongxin Guoan	West Taijinair	2475
	Brazil	Companhia Brasileira de Lítio	507		Grupo Mota	Alvarroes	1058		Albemarle Corporation	Dimensional Fund Advisors LP	766.95		Brazil	Cachoeira	507		Tibet Mining Asset Operation Co. Ltd.	China	2433.6		Tibet Mining Asset Operation Co. Ltd.	Zhabuye	2433.6
	Japan	Toyota Tsusho Corporation	429.5		Jujuy Energia y Mineria Sociedad del Estado	Cauchari-Olaroz	850		Albemarle Corporation	Point72 Asset Management LP	670.28						New China Life Insurance Co. Ltd.	China	2311.67		State Street Global Advisors Inc.	Greenbushes	2413
					Tianqi Lithium Corporation	Zhabuye	608.4		Albemarle Corporation	Gates Capital Management Inc.	622.417						Wei Ping Jiang	China	2294.27		New China Life Insurance Co. Ltd.	Greenbushes	2311.67
					Companhia Brasileira de Lítio	Cachoeira	507		Albemarle Corporation	Millennium Management LLC	618.498						Columbia Management Investment Advisers LLC	USA	1950.81		Wei Ping Jiang	Greenbushes	2294.27
					Toyota Tsusho Corporation	Salar de Olaroz	429.5		Albemarle Corporation	Macquarie Investment Management Business Trust	599.464						JP Morgan Asset Management	USA	1898.13		BlackRock Inc.	Salar de Atacama2	2224.76
					Jujuy Energia y Mineria Sociedad del Estado	Salar de Olaroz	146.03		Albemarle Corporation	Northern Trust Global Investments	572.825						China Universal Asset Management Co. Ltd.	China	1801.74		Capital Research & Mgmt Co.	Salar del Hombre Muerto	2133.33
									Albemarle Corporation	Norges Bank Investment Management	562.474						Systematic Financial Management LP	USA	1685.87		Vanguard Group Inc.	Salar de Atacama2	1846.79
									Albemarle Corporation	Thrivent Investment Management Inc.	561.603						Glenview Capital Management LLC	USA	1549.06		FMR LLC	Greenbushes	1819.65
									Albemarle Corporation	Bank of America Corp.	533.711						National Council for Social Security Fund	China	1513.19		China Universal Asset Management Co. Ltd.	Greenbushes	1801.74
									Albemarle Corporation	Alyeska Investment Group L.P.	531.18						Central Huijin Asset Management Ltd.	China	1085.4		Franklin Resources Inc.	Salar de Atacama2	1767.36
									Albemarle Corporation	SPF Beheer BV	489.975						Portugal Firms	Portugal	1058		Glenview Capital Management LLC	Salar del Hombre Muerto	1549.06
									Albemarle Corporation	Tide Point Capital Management LP	477.184						ClearBridge LLC	USA	1009.88		National Council for Social Security Fund	Greenbushes	1513.19
									Albemarle Corporation	Westwood Management Corp.	445.896						George Ring Ireland	USA	1007.42		Teachers Insurance and Annuity Association-College Retirement Equities Fund	Salar de Atacama2	1493.97
									Albemarle Corporation	New Jersey Division of Investment	441.395						Argentina Firms	Argentina	996.03		Vanguard Group Inc.	Salar del Hombre Muerto	1492.12
									Albemarle Corporation	Lord Abbett & Co. LLC	401.823						Qinghai State-owned Assets Investment and Management Co. Ltd.	China	981.459		State Street Global Advisors Inc.	Salar de Atacama2	1371.29
									Albemarle Corporation	Geode Capital Management LLC	398.325						BNY Asset Management	USA	934.707		BlackRock Inc.	Salar del Hombre Muerto	1233.19
									Albemarle Corporation	Principal Global Investors LLC	391.366						Massachusetts Financial Services Company	USA	909.322		JP Morgan Asset Management	Greenbushes	1119.85
									Albemarle Corporation	STRS Ohio	358.852						Barrow Hanley Mewhinney & Strauss LLC	USA	821.411		Central Huijin Asset Management Ltd.	Greenbushes	1085.4
									Albemarle Corporation	Edge Asset Management Inc.	321.51						Macquarie Investment Management Business Trust	USA	804.037		Portugal Firms	Alvarroes	1058
									Albemarle Corporation	Royce & Associates LP	316.671						Northern Trust Global Investments	United Kingdom	792.934		FMR LLC	Salar de Atacama2	1034.09
									Albemarle Corporation	Invesco Ltd.	296.612						Stelliam Investment Management LP	USA	775.423		George Ring Ireland	Cauchari-Olaroz	1007.42
									Albemarle Corporation	Schroder Investment Management North America Inc.	295.154						Dimensional Fund Advisors LP	USA	766.95		Systematic Financial Management LP	Greenbushes	994.624
									Albemarle Corporation	Anchor Bolt Capital LP	291.54						Sinochem Holdings Corporation Ltd.	China	744.927		Qinghai State-owned Assets Investment and Management Co. Ltd.	Chaerhan Lake	981.459
									Albemarle Corporation	Putnam LLC	279.482						Norges Bank Investment Management	Norway	702.938		Columbia Management Investment Advisers LLC	Greenbushes	970.102
									Albemarle Corporation	London Co. of Virginia LLC	170.086						Kowa Company Ltd.	Japan	690.008		Argentina Firms	Cauchari-Olaroz	850
									Albemarle Corporation	RBC Global Asset Management Inc.	133.959						Jennison Associates LLC	USA	671.75		Barrow Hanley Mewhinney & Strauss LLC	Salar del Hombre Muerto	821.411
									Albemarle Corporation	Luminus Management LLC	132.735						Point72 Asset Management LP	USA	670.28		Sinochem Holdings Corporation Ltd.	Chaerhan Lake	744.927
									Albemarle Corporation	Goldman Sachs Group Inc.	122.67						China International Fund Management Co. Ltd.	China	664.302		State Street Global Advisors Inc.	Salar del Hombre Muerto	723.086
									Albemarle Corporation	Honeywell Capital Management LLC	122.65						Manning & Napier Advisors LLC	USA	663.973		Kowa Company Ltd.	Salar de Atacama1	690.008
									Albemarle Corporation	Legg Mason, Inc.	115.623						Gates Capital Management Inc.	USA	622.417		Jennison Associates LLC	Salar del Hombre Muerto	671.75
									Albemarle Corporation	Hahn Capital Management LLC	113.226						Millennium Management LLC	USA	618.498		China International Fund Management Co. Ltd.	Greenbushes	664.302
									Albemarle Corporation	SKBA Capital Management LLC	111.515						Thrivent Investment Management Inc.	USA	561.603		Manning & Napier Advisors LLC	Salar de Atacama1	663.973
									Albemarle Corporation	Nikko Asset Management Co. Ltd.	111.307						Geode Capital Management LLC	USA	534.278		Capital Research & Mgmt Co.	Silver Peak	660.692
									Albemarle Corporation	New York State Common Retirement Fund	110.889						Bank of America Corp.	USA	533.711		ClearBridge LLC	Greenbushes	643.935
									Albemarle Corporation	UBS Asset Management AG	109.106						Alyeska Investment Group L.P.	USA	531.18		JP Morgan Asset Management	Salar de Atacama2	636.403
									Albemarle Corporation	California Public Employees' Retirement System	107.532						Brazil Firms	Brazil	507		Chengdu Tianqi Industry Group Co. Ltd.	Zhabuye	608.4
									Albemarle Corporation	Charles Schwab Investment Management Inc.	105.736						SPF Beheer BV	Netherlands	489.975		Massachusetts Financial Services Company	Greenbushes	579.817
									Albemarle Corporation	New Amsterdam Partners LLC	104.319						Tide Point Capital Management LP	USA	477.184		Systematic Financial Management LP	Salar de Atacama2	565.236
									Albemarle Corporation	Retirement Systems Of Alabama	104.085						Fullgoal Fund Management Co. Ltd.	China	475.932		Columbia Management Investment Advisers LLC	Salar de Atacama2	551.3
									Albemarle Corporation	Discovery Capital Management LLC	100.168						Fairpointe Capital LLC	USA	469.05		FMR LLC	Salar del Hombre Muerto	507.661
									Tianqi Lithium Corporation	Chengdu Tianqi Industry Group Co. Ltd.	16538						Atlantic Investment Management Inc.	USA	449.732		Brazil Firms	Cachoeira	507
									Tianqi Lithium Corporation	New China Life Insurance Co. Ltd.	2311.67						Westwood Management Corp.	USA	445.896		BNY Asset Management	Greenbushes	498.4
									Tianqi Lithium Corporation	Wei Ping Jiang	2294.27						New Jersey Division of Investment	USA	441.395		BlackRock Inc.	Silver Peak	495.96
									Tianqi Lithium Corporation	China Universal Asset Management Co. Ltd.	1801.74						Japan Firms	Japan	429.5		Stelliam Investment Management LP	Greenbushes	494.439
									Tianqi Lithium Corporation	National Council for Social Security Fund	1513.19						Lord Abbett & Co. LLC	USA	401.823		Dimensional Fund Advisors LP	Greenbushes	489.036
									Tianqi Lithium Corporation	Central Huijin Asset Management Ltd.	1085.4						Brandes Investment Partners LP	USA	399.932		Fullgoal Fund Management Co. Ltd.	Greenbushes	475.932
									Tianqi Lithium Corporation	China International Fund Management Co. Ltd.	664.302						Principal Global Investors LLC	USA	391.366		Fairpointe Capital LLC	Salar del Hombre Muerto	469.05
									Tianqi Lithium Corporation	Fullgoal Fund Management Co. Ltd.	475.932						Sarasin & Partners LLP	United Kingdom	388.336		Atlantic Investment Management Inc.	Salar del Hombre Muerto	449.732
									Tianqi Lithium Corporation	GF Fund Management Co. Ltd.	361.774						Sasco Capital Inc.	USA	366.228		Japan Firms	Salar de Olaroz	429.5
									Tianqi Lithium Corporation	Guotai Asset Mgmt Co. Ltd.	344.512						GF Fund Management Co. Ltd.	China	361.774		Point72 Asset Management LP	Greenbushes	427.395
									Tianqi Lithium Corporation	China Southern Asset Management Co. Ltd.	339.942						STRS Ohio	USA	358.852		Vanguard Group Inc.	Silver Peak	411.701
									Tianqi Lithium Corporation	Yinhua Fund Management Co. Ltd.	339.915						Pzena Investment Management Inc.	USA	351.235		Brandes Investment Partners LP	Salar de Atacama1	399.932
									Tianqi Lithium Corporation	Shenzhen Qianyuan Investment Co., Ltd.	313.605						Guotai Asset Mgmt Co. Ltd.	China	344.512		Gates Capital Management Inc.	Greenbushes	396.876
									Tianqi Lithium Corporation	China Asset Management Co. Ltd.	262.283						China Southern Asset Management Co. Ltd.	China	339.942		Millennium Management LLC	Greenbushes	394.377
									Tianqi Lithium Corporation	Harvest Fund Management Co. Ltd.	245.405						Yinhua Fund Management Co. Ltd.	China	339.915		Franklin Resources Inc.	Silver Peak	393.993
									Tianqi Lithium Corporation	China Merchants Fund Management Co. Ltd.	223.393						LSV Asset Management	USA	339.594		Sarasin & Partners LLP	Salar de Atacama1	388.336
									Tianqi Lithium Corporation	E Fund Management Co. Ltd.	221.054						Thunderbird Partners LLP	United Kingdom	329.96		Macquarie Investment Management Business Trust	Greenbushes	382.24
									Sociedad Química y Minera de Chile S.A.	Nutrien Ltd.	10558.3						River Road Asset Management LLC	USA	323.027		Sasco Capital Inc.	Salar del Hombre Muerto	366.228
									Sociedad Química y Minera de Chile S.A.	Inversiones SQYA S.A	9886.8						Foord Asset Management Guernsey Ltd	United Kingdom	322.395		ClearBridge LLC	Salar de Atacama2	365.942
									Sociedad Química y Minera de Chile S.A.	SailingStone Capital Partners LLC	3042.9						Edge Asset Management Inc.	USA	321.51		Northern Trust Global Investments	Greenbushes	365.255
									Sociedad Química y Minera de Chile S.A.	Kowa Company Ltd.	690.008						Royce & Associates LP	USA	316.671		GF Fund Management Co. Ltd.	Greenbushes	361.774
									Sociedad Química y Minera de Chile S.A.	Manning & Napier Advisors LLC	663.973						Shenzhen Qianyuan Investment Co., Ltd.	China	313.605		Norges Bank Investment Management	Greenbushes	358.654
									Sociedad Química y Minera de Chile S.A.	Brandes Investment Partners LP	399.932						Invesco Ltd.	USA	296.612		Thrivent Investment Management Inc.	Greenbushes	358.099
									Sociedad Química y Minera de Chile S.A.	Sarasin & Partners LLP	388.336						Abrdn Holdings Limited	United Kingdom	295.17		Pzena Investment Management Inc.	Salar del Hombre Muerto	351.235
									Sociedad Química y Minera de Chile S.A.	Vanguard Group Inc.	340.001						Schroder Investment Management North America Inc.	USA	295.154		Guotai Asset Mgmt Co. Ltd.	Greenbushes	344.512
									Sociedad Química y Minera de Chile S.A.	BlackRock Inc.	308.166						Anchor Bolt Capital LP	USA	291.54		Bank of America Corp.	Greenbushes	340.314
									Sociedad Química y Minera de Chile S.A.	Abrdn Holdings Limited	295.17						Luther King Capital Management Corp.	USA	285.618		Vanguard Group Inc.	Salar de Atacama1	340.001
									Sociedad Química y Minera de Chile S.A.	FMR LLC	217.829						Putnam LLC	USA	279.482		China Southern Asset Management Co. Ltd.	Greenbushes	339.942
									Sociedad Química y Minera de Chile S.A.	Macquarie Investment Management Business Trust	204.574						China Asset Management Co. Ltd.	China	262.283		Yinhua Fund Management Co. Ltd.	Greenbushes	339.915
									Sociedad Química y Minera de Chile S.A.	Administradora de Fondos de Pensiones Cuprum SA	197.772						MultiConcept Fund Management S.A.	Luxembourg	260.531		LSV Asset Management	Salar del Hombre Muerto	339.594
									Sociedad Química y Minera de Chile S.A.	Eaton Vance Management	123.229						Harvest Fund Management Co. Ltd.	China	245.405		Alyeska Investment Group L.P.	Greenbushes	338.7
									Qinghai Salt Lake Industry Co.,Ltd	Qinghai State-owned Assets Investment and Management Co. Ltd.	981.459						Frank Russell Co.	USA	241.579		Teachers Insurance and Annuity Association-College Retirement Equities Fund	Silver Peak	333.046
									Qinghai Salt Lake Industry Co.,Ltd	Sinochem Holdings Corporation Ltd.	744.927						China Cinda Asset Management Co. Ltd.	China	226.189		Thunderbird Partners LLP	Salar del Hombre Muerto	329.96
									Qinghai Salt Lake Industry Co.,Ltd	China Cinda Asset Management Co. Ltd.	226.189						China Merchants Fund Management Co. Ltd.	China	223.393		Massachusetts Financial Services Company	Salar de Atacama2	329.505
									Qinghai Salt Lake Industry Co.,Ltd	China Great Wall Asset Management Co. Ltd.	106.477						American Century Investment Management Inc	USA	222.522		River Road Asset Management LLC	Salar del Hombre Muerto	323.027
									FMC Corp.	Capital Research & Mgmt Co.	2133.33						E Fund Management Co. Ltd.	China	221.054		Foord Asset Management Guernsey Ltd	Salar del Hombre Muerto	322.395
									FMC Corp.	Glenview Capital Management LLC	1549.06						Perkins Investment Management LLC	USA	199.01		Shenzhen Qianyuan Investment Co., Ltd.	Greenbushes	313.605
									FMC Corp.	Vanguard Group Inc.	1492.12						Administradora de Fondos de Pensiones Cuprum SA	Chile	197.772		SPF Beheer BV	Greenbushes	312.426
									FMC Corp.	BlackRock Inc.	1233.19						Franco Mignacco	Canada	178.52		BlackRock Inc.	Salar de Atacama1	308.166
									FMC Corp.	Barrow Hanley Mewhinney & Strauss LLC	821.411						London Co. of Virginia LLC	USA	170.086		Columbia Management Investment Advisers LLC	Salar del Hombre Muerto	306.505
									FMC Corp.	State Street Global Advisors Inc.	723.086						Allspring Global Investments LLC	USA	164.882		State Street Global Advisors Inc.	Silver Peak	305.697
									FMC Corp.	Jennison Associates LLC	671.75						Ivory Investment Management LLC	USA	157.633		Tide Point Capital Management LP	Greenbushes	304.27
									FMC Corp.	FMR LLC	507.661						Australia Firms	Australia	150		Abrdn Holdings Limited	Salar de Atacama1	295.17
									FMC Corp.	Fairpointe Capital LLC	469.05						RBC Global Asset Management Inc.	Canada	133.959		Luther King Capital Management Corp.	Salar del Hombre Muerto	285.618
									FMC Corp.	Atlantic Investment Management Inc.	449.732						Luminus Management LLC	USA	132.735		Westwood Management Corp.	Greenbushes	284.32
									FMC Corp.	Sasco Capital Inc.	366.228						Eaton Vance Management	USA	123.229		BNY Asset Management	Salar de Atacama2	283.236
									FMC Corp.	Pzena Investment Management Inc.	351.235						Goldman Sachs Group Inc.	USA	122.67		New Jersey Division of Investment	Greenbushes	281.45
									FMC Corp.	LSV Asset Management	339.594						Honeywell Capital Management LLC	USA	122.65		Stelliam Investment Management LP	Salar de Atacama2	280.985
									FMC Corp.	Thunderbird Partners LLP	329.96						Cove Street Capital LLC	USA	117.591		Dimensional Fund Advisors LP	Salar de Atacama2	277.914
									FMC Corp.	River Road Asset Management LLC	323.027						John Anthony Kanellitsas	Canada	115.756		China Asset Management Co. Ltd.	Greenbushes	262.283
									FMC Corp.	Foord Asset Management Guernsey Ltd	322.395						Legg Mason, Inc.	USA	115.623		MultiConcept Fund Management S.A.	Salar del Hombre Muerto	260.531
									FMC Corp.	Columbia Management Investment Advisers LLC	306.505						Hahn Capital Management LLC	USA	113.226		Lord Abbett & Co. LLC	Greenbushes	256.217
									FMC Corp.	Luther King Capital Management Corp.	285.618						SKBA Capital Management LLC	USA	111.515		Geode Capital Management LLC	Greenbushes	253.987
									FMC Corp.	MultiConcept Fund Management S.A.	260.531						Nikko Asset Management Co. Ltd.	Japan	111.307		Principal Global Investors LLC	Greenbushes	249.549
									FMC Corp.	Frank Russell Co.	241.579						New York State Common Retirement Fund	USA	110.889		Harvest Fund Management Co. Ltd.	Greenbushes	245.405
									FMC Corp.	American Century Investment Management Inc	222.522						UBS Asset Management AG	Switzerland	109.106		Point72 Asset Management LP	Salar de Atacama2	242.885
									FMC Corp.	Northern Trust Global Investments	220.109						California Public Employees' Retirement System	USA	107.532		Frank Russell Co.	Salar del Hombre Muerto	241.579
									FMC Corp.	Perkins Investment Management LLC	199.01						China Great Wall Asset Management Co. Ltd.	China	106.477		FMR LLC	Silver Peak	230.526
									FMC Corp.	Allspring Global Investments LLC	164.882						Charles Schwab Investment Management Inc.	USA	105.736		STRS Ohio	Greenbushes	228.817
									FMC Corp.	Ivory Investment Management LLC	157.633						New Amsterdam Partners LLC	USA	104.319		China Cinda Asset Management Co. Ltd.	Chaerhan Lake	226.189
									FMC Corp.	BNY Asset Management	153.07						Retirement Systems Of Alabama	USA	104.085		Gates Capital Management Inc.	Salar de Atacama2	225.541
									FMC Corp.	Norges Bank Investment Management	140.464						Discovery Capital Management LLC	USA	100.168		Millennium Management LLC	Salar de Atacama2	224.121
									FMC Corp.	Geode Capital Management LLC	135.953										China Merchants Fund Management Co. Ltd.	Greenbushes	223.393
									FMC Corp.	Cove Street Capital LLC	117.591										American Century Investment Management Inc	Salar del Hombre Muerto	222.522
									Yichun Tantalum Co Ltd	Jiangxi Tungsten Holding Group Co., LTD	9787										E Fund Management Co. Ltd.	Greenbushes	221.054
									Allkem Limited	Australia Firms	150										Northern Trust Global Investments	Salar del Hombre Muerto	220.109
									Toyota Tsusho Corporation	Japan Firms	429.5										FMR LLC	Salar de Atacama1	217.829
									Jujuy Energia y Mineria Sociedad del Estado	Argentina Firms	996.03										Macquarie Investment Management Business Trust	Salar de Atacama2	217.224
									Sinomine International Exploration (Hong Kong) Co. Ltd.	China Firms	3842.82										Northern Trust Global Investments	Salar de Atacama2	207.571
									Lithium Americas (Argentina) Corp.	George Ring Ireland	1007.42										Edge Asset Management Inc.	Greenbushes	205.007
									Lithium Americas (Argentina) Corp.	Franco Mignacco	178.52										Macquarie Investment Management Business Trust	Salar de Atacama1	204.574
									Lithium Americas (Argentina) Corp.	John Anthony Kanellitsas	115.756										Norges Bank Investment Management	Salar de Atacama2	203.82
									Western Mining Group Co., Ltd.	China Firms	7426										Thrivent Investment Management Inc.	Salar de Atacama2	203.504
									Tibet Mineral Development Co., LTD	Tibet Mining Asset Operation Co. Ltd.	2433.6										Royce & Associates LP	Greenbushes	201.921
									Qinghai Zhongxin Guoan Technology development Co., LTD	Zhongxin Guoan	2475										Perkins Investment Management LLC	Salar del Hombre Muerto	199.01
									Companhia Brasileira de Lítio	Brazil Firms	507										Administradora de Fondos de Pensiones Cuprum SA	Salar de Atacama1	197.772
									Grupo Mota	Portugal Firms	1058										Bank of America Corp.	Salar de Atacama2	193.397
																					Alyeska Investment Group L.P.	Salar de Atacama2	192.48
																					Invesco Ltd.	Greenbushes	189.131
																					Schroder Investment Management North America Inc.	Greenbushes	188.201
																					Anchor Bolt Capital LP	Greenbushes	185.897
																					Franco Mignacco	Cauchari-Olaroz	178.52
																					Putnam LLC	Greenbushes	178.208
																					SPF Beheer BV	Salar de Atacama2	177.549
																					Tide Point Capital Management LP	Salar de Atacama2	172.914
																					London Co. of Virginia LLC	Greenbushes	170.086
																					Allspring Global Investments LLC	Salar del Hombre Muerto	164.882
																					Westwood Management Corp.	Salar de Atacama2	161.576
																					New Jersey Division of Investment	Salar de Atacama2	159.945
																					Ivory Investment Management LLC	Salar del Hombre Muerto	157.633
																					BNY Asset Management	Salar del Hombre Muerto	153.07
																					Australia Firms	Salar de Olaroz	150
																					Argentina Firms	Salar de Olaroz	146.03
																					Lord Abbett & Co. LLC	Salar de Atacama2	145.606
																					Geode Capital Management LLC	Salar de Atacama2	144.338
																					JP Morgan Asset Management	Silver Peak	141.872
																					Principal Global Investors LLC	Salar de Atacama2	141.816
																					Norges Bank Investment Management	Salar del Hombre Muerto	140.464
																					Geode Capital Management LLC	Salar del Hombre Muerto	135.953
																					RBC Global Asset Management Inc.	Greenbushes	133.959
																					Luminus Management LLC	Greenbushes	132.735
																					STRS Ohio	Salar de Atacama2	130.035
																					Systematic Financial Management LP	Silver Peak	126.006
																					Eaton Vance Management	Salar de Atacama1	123.229
																					Columbia Management Investment Advisers LLC	Silver Peak	122.9
																					Goldman Sachs Group Inc.	Greenbushes	122.67
																					Honeywell Capital Management LLC	Greenbushes	122.65
																					Cove Street Capital LLC	Salar del Hombre Muerto	117.591
																					Edge Asset Management Inc.	Salar de Atacama2	116.503
																					John Anthony Kanellitsas	Cauchari-Olaroz	115.756
																					Legg Mason, Inc.	Greenbushes	115.623
																					Royce & Associates LP	Salar de Atacama2	114.75
																					Hahn Capital Management LLC	Greenbushes	113.226
																					SKBA Capital Management LLC	Greenbushes	111.515
																					Nikko Asset Management Co. Ltd.	Greenbushes	111.307
																					New York State Common Retirement Fund	Greenbushes	110.889
																					UBS Asset Management AG	Greenbushes	109.106
																					California Public Employees' Retirement System	Greenbushes	107.532
																					Invesco Ltd.	Salar de Atacama2	107.481
																					Schroder Investment Management North America Inc.	Salar de Atacama2	106.953
																					China Great Wall Asset Management Co. Ltd.	Chaerhan Lake	106.477
																					Charles Schwab Investment Management Inc.	Greenbushes	105.736
																					Anchor Bolt Capital LP	Salar de Atacama2	105.643
																					New Amsterdam Partners LLC	Greenbushes	104.319
																					Retirement Systems Of Alabama	Greenbushes	104.085
																					Putnam LLC	Salar de Atacama2	101.274
																					Discovery Capital Management LLC	Greenbushes	100.168

[truncated: 8 more sheets: 2016, 2017, 2018, 2019, 2020, 2021, 2022, 2023]
